# Supplementary material
Source: publisher site journal article supplement (https://www.spandidos-publications.com/299/downloadSupplementary)
Supplement: Supplementary file 1 [file downloadSupplementary]

## Sheet: TCGA RCC
Table SI. Basic information of patients with renal cell carcinoma in TCGA database.
Case ID	Submitter ID	Project ID	Sex	Year of birth	Race	Ethnicity	Year of death	Tumor stage	Age at diagnosis (days)	Vital status	Days to death	Days to last follow up
08a8eec3-c97a-4493-a7de-b2a686b4df67	TCGA-B2-3923	TCGA-KIRC	Male	1951	Caucasian	Not Hispanic or Latin American	--	Stage II	21793	Survived	--	992
ac30d54e-f7e3-4185-ab99-89adceff3e69	TCGA-B0-4834	TCGA-KIRC	Male	1954	Caucasian	Not Hispanic or Latin American	2008	Stage I	18224	Deceased	2090	--
e1e15226-9f8e-4035-8f08-eb1fed57080e	TCGA-KN-8434	TCGA-KICH	Female	1944	Caucasian	Not Hispanic or Latin American	--	Stage II	23934	Survived	--	1797
685a343d-c253-40e9-a53c-6521baf24f9f	TCGA-A4-7915	TCGA-KIRP	Female	1976	African descent	Not Hispanic or Latin American	--	Stage II	12832	Survived	--	7
104604c8-2cb5-4538-b964-dbff3b6bc19f	TCGA-P4-A5ED	TCGA-KIRP	Male	1954	Caucasian	Hispanic or Latin American	--	Stage I	18698	Survived	--	2816
f8804530-3c83-4787-9467-b18a1c73f610	TCGA-BP-4159	TCGA-KIRC	Male	1932	Caucasian	Not reported	2009	Stage I	25677	Deceased	2601	--
f184de71-65d0-4e52-aec2-25c5414588c5	TCGA-B0-4945	TCGA-KIRC	Female	1928	Caucasian	Not Hispanic or Latin American	2008	Stage I	27523	Deceased	2145	--
d26f3a6b-72f4-4e48-815e-57b8b211112d	TCGA-B0-5698	TCGA-KIRC	Male	1928	African descent	Not Hispanic or Latin American	--	Stage I	28438	Survived	--	3631
f9c593d1-f204-4026-8a9b-a6af0922c885	TCGA-2Z-A9JL	TCGA-KIRP	Male	1965	African descent	Not Hispanic or Latin American	--	Stage I	17367	Survived	--	1006
366f39be-05ab-402b-9525-725e095de570	TCGA-F9-A7Q0	TCGA-KIRP	Female	1976	Asian	Not Hispanic or Latin American	--	Stage I	13523	Survived	--	398
77657eb5-0c77-4f85-9a5e-9f7071d82155	TCGA-B1-A657	TCGA-KIRP	Male	1958	Caucasian	Not Hispanic or Latin American	--	Stage I	19806	Survived	--	641
9cdda9fa-d492-4902-afc1-eb2244e70c1b	TCGA-CZ-5451	TCGA-KIRC	Male	1932	Caucasian	Not reported	--	Stage II	27312	Survived	--	1929
ed2e9354-5ee1-4fcf-92ec-a1b507818b91	TCGA-B2-5636	TCGA-KIRC	Male	1931	Caucasian	Not Hispanic or Latin American	--	Stage I	28901	Survived	--	919
44143697-c4b3-4051-9594-d53131c05889	TCGA-BP-4758	TCGA-KIRC	Male	1964	Caucasian	Not reported	--	Stage I	14824	Survived	--	2208
31e9d2fc-79fa-49db-adac-7afb9609f915	TCGA-B0-4837	TCGA-KIRC	Male	1940	Caucasian	Not Hispanic or Latin American	2006	Stage I	23129	Deceased	1378	--
0a93c52e-7e96-406b-b40d-b2925ba4ebd1	TCGA-AK-3465	TCGA-KIRC	Female	1937	African descent	Not Hispanic or Latin American	--	Stage I	26232	Survived	--	369
c129b63f-90cb-40dc-beed-757634004821	TCGA-BP-4963	TCGA-KIRC	Male	1942	Caucasian	Not Hispanic or Latin American	--	Stage I	23373	Survived	--	1834
7a4283eb-00e8-4174-b6b9-6d98c65932c5	TCGA-B0-4688	TCGA-KIRC	Male	1962	Caucasian	Not Hispanic or Latin American	2008	Stage IV	16804	Deceased	101	--
fb9bafa5-7133-4955-8156-4eb6763dc8e1	TCGA-B0-5695	TCGA-KIRC	Female	1946	Caucasian	Not Hispanic or Latin American	--	Stage I	22320	Survived	--	2150
f2b90375-6806-4833-a927-565674cbf355	TCGA-B8-A7U6	TCGA-KIRC	Female	1959	African descent	Not Hispanic or Latin American	--	Stage I	19803	Survived	--	495
6ab00314-5228-43ba-9880-9d5177b64c61	TCGA-CJ-6030	TCGA-KIRC	Male	1938	Caucasian	Not Hispanic or Latin American	2009	Stage I	24096	Deceased	2299	--
6ccd4657-ffa3-4e82-929f-9a7366a89578	TCGA-BP-4993	TCGA-KIRC	Male	1949	Caucasian	Not reported	--	Stage I	21407	Survived	--	177
9fc9c087-0c82-49ea-8437-861a3029c3d4	TCGA-B9-A5W9	TCGA-KIRP	Male	1972	Caucasian	Not Hispanic or Latin American	--	Stage I	14668	Survived	--	5
9245a557-01ea-4446-b9e9-313f6ab18834	TCGA-BP-4995	TCGA-KIRC	Male	1939	Caucasian	Not Hispanic or Latin American	--	Stage I	24850	Survived	--	1371
2e81cfda-5080-49b8-95ca-ba3963dae30c	TCGA-A3-3326	TCGA-KIRC	Male	1959	Caucasian	Not reported	--	Stage I	17285	Survived	--	1137
295004c6-d52e-4971-82ff-84595850f548	TCGA-5P-A9JU	TCGA-KIRP	Male	1931	Caucasian	Not Hispanic or Latin American	--	Stage III	29594	Survived	--	373
a8db1341-a7fc-4306-91ad-5caaca5c8a6e	TCGA-CJ-4912	TCGA-KIRC	Male	1945	Caucasian	Hispanic or Latin American	--	Stage II	22623	Survived	--	1657
2bc5b2ec-aa8f-4889-9d92-d27f96c9fda1	TCGA-A3-3373	TCGA-KIRC	Female	1953	Caucasian	Not Hispanic or Latin American	--	Stage I	19964	Survived	--	1621
a50fe35a-c05b-42a4-a1ce-dac49d6e761d	TCGA-BP-4774	TCGA-KIRC	Female	1948	Caucasian	Not reported	--	Stage I	20827	Survived	--	1885
10d3a64b-22d0-4846-8972-d78173deca2c	TCGA-DW-7837	TCGA-KIRP	Male	1964	African descent	Not Hispanic or Latin American	--	Stage I	15891	Survived	--	1142
315b6dea-02c6-44dc-9788-a72f78fae815	TCGA-BP-5182	TCGA-KIRC	Male	1951	Caucasian	Not Hispanic or Latin American	--	Stage I	20597	Survived	--	1165
e8c2a8c6-5c2b-460b-b536-60bc537e6be3	TCGA-KN-8433	TCGA-KICH	Female	1962	Caucasian	Not Hispanic or Latin American	--	Stage III	17108	Survived	--	341
57578a0d-b719-46e7-83ab-872a4e984dbb	TCGA-B0-4811	TCGA-KIRC	Male	1953	Caucasian	Not Hispanic or Latin American	2004	Stage III	17792	Deceased	1417	--
9868ae73-3459-4aa6-b71a-39953cdbbe1a	TCGA-A3-3325	TCGA-KIRC	Male	1954	Caucasian	Not Hispanic or Latin American	--	Stage I	19126	Deceased	1170	751
284b4e63-ae72-476c-a28e-866c6b77ac00	TCGA-GL-8500	TCGA-KIRP	Male	1948	Caucasian	Not Hispanic or Latin American	--	Stage I	23338	Survived	--	841
a9f73fb6-fc3e-4c0d-ace3-36cd7dcee256	TCGA-BP-4347	TCGA-KIRC	Male	1932	Caucasian	Not Hispanic or Latin American	--	Stage III	27146	Survived	--	1367
b15f495d-8598-4404-86b0-519df0f2d504	TCGA-BP-4776	TCGA-KIRC	Male	1953	Caucasian	Not reported	--	Stage I	19143	Survived	--	411
2a9c4ce5-f5b3-4d3e-b6f5-07a9369096b8	TCGA-BP-4972	TCGA-KIRC	Female	1963	Caucasian	Not reported	--	Stage III	16038	Survived	--	1502
3cad2139-0bc5-4c8f-994a-018be7e2e6ea	TCGA-BQ-7058	TCGA-KIRP	Male	1929	Caucasian	Not Hispanic or Latin American	2010	Stage III	29856	Deceased	343	--
b06cdf61-61c9-4035-a55d-1ef21dc21069	TCGA-AL-A5DJ	TCGA-KIRP	Female	1955	Caucasian	Not Hispanic or Latin American	--	Stage III	20079	Deceased	1498	26
b6abbdcc-f826-499d-b6f1-f6e2c83f9d8b	TCGA-B0-5116	TCGA-KIRC	Male	1958	Caucasian	Not Hispanic or Latin American	--	Stage III	19352	Survived	--	1274
68642658-7996-4423-bb25-d3beb9a414f1	TCGA-SX-A71W	TCGA-KIRP	Male	1946	Caucasian	Not Hispanic or Latin American	--	Stage I	24110	Survived	--	1076
f6d28a1d-6691-4ac1-8afb-ab0e7dcef867	TCGA-DV-5565	TCGA-KIRC	Male	1948	Caucasian	Not Hispanic or Latin American	--	Stage I	21642	Survived	--	1329
9256867c-dc82-4e1a-85d6-e4c9bde8ab8c	TCGA-B8-A54D	TCGA-KIRC	Male	1942	African descent	Not Hispanic or Latin American	--	Stage III	25429	Survived	--	830
fef57c51-0858-42fb-b9eb-3727d274a4e1	TCGA-DV-A4VZ	TCGA-KIRC	Male	1954	African descent	Not Hispanic or Latin American	--	Stage I	19560	Survived	--	365
65d56c51-1d58-419e-8c77-a037fc588f5b	TCGA-B8-4621	TCGA-KIRC	Male	1947	African descent	Not Hispanic or Latin American	--	Stage I	23176	Survived	--	788
87971996-94d7-4e88-8ed5-e059db838af7	TCGA-5P-A9KF	TCGA-KIRP	Male	1958	Caucasian	Not Hispanic or Latin American	--	Not reported	19631	Survived	--	845
8af42b33-6ab7-4ea0-860d-f3af9177ee2d	TCGA-B1-A656	TCGA-KIRP	Male	1948	Caucasian	Not Hispanic or Latin American	--	Stage I	23702	Survived	--	618
766999d7-fa28-415b-8783-be62b1b2fd70	TCGA-B8-5164	TCGA-KIRC	Male	1945	Caucasian	Not Hispanic or Latin American	--	Stage III	23863	Survived	--	26
5f0f03c2-4a39-48c4-a41d-c2990c422741	TCGA-B0-4690	TCGA-KIRC	Male	1943	Caucasian	Not Hispanic or Latin American	2008	Stage IV	23985	Deceased	43	--
21eea125-1298-42d3-a50c-57d596e0420d	TCGA-A3-3329	TCGA-KIRC	Male	1932	Caucasian	Not Hispanic or Latin American	--	Stage I	27650	Survived	--	1624
02979422-5149-4750-ad5f-483e0bec6ac5	TCGA-KL-8327	TCGA-KICH	Female	1955	Caucasian	Not reported	--	Stage I	17121	Survived	--	4169
0d88e6ab-cf1d-4888-878b-0ac7d687c4cc	TCGA-BP-4960	TCGA-KIRC	Male	1958	Caucasian	Not reported	--	Stage II	17099	Survived	--	2172
8fd493c5-1375-4f76-b337-c9a75e3abdbe	TCGA-CJ-4644	TCGA-KIRC	Female	1956	Caucasian	Not Hispanic or Latin American	2004	Stage IV	17882	Deceased	336	--
5cbf0134-023b-4bd0-97da-eb836ccbc729	TCGA-2Z-A9J9	TCGA-KIRP	Male	1929	African descent	Not Hispanic or Latin American	--	Stage I	28346	Survived	--	2294
3b76c73f-f530-4a3a-91c4-31834747321e	TCGA-BQ-5892	TCGA-KIRP	Male	1959	Caucasian	Not Hispanic or Latin American	--	Stage I	18785	Survived	--	364
c3cc716b-1b9c-4e73-9a40-f1f891a17c2d	TCGA-BP-4770	TCGA-KIRC	Female	1932	Caucasian	Not reported	2005	Stage IV	26824	Deceased	329	--
4a9a3a6d-090a-4c26-b16c-d65055f05628	TCGA-Q2-A5QZ	TCGA-KIRP	Female	1951	African descent	Not Hispanic or Latin American	--	Stage III	22531	Survived	--	428
a904ce56-42e6-4e61-ab62-cdf8192afbb4	TCGA-UZ-A9PJ	TCGA-KIRP	Male	--	Caucasian	Not Hispanic or Latin American	--	Stage I	28490	Deceased	797	0
0242658f-a698-4e68-b6e3-2f4aa076763e	TCGA-BP-4162	TCGA-KIRC	Female	1937	Caucasian	Not reported	--	Stage I	23966	Survived	--	3074
d23d354d-04b0-4ff4-bd83-6a2d1ecf3b47	TCGA-BP-4961	TCGA-KIRC	Male	1958	Caucasian	Not reported	--	Stage I	17284	Survived	--	1935
f9e6afeb-cf13-4dd7-8a1f-571ab610df4f	TCGA-BP-4353	TCGA-KIRC	Male	1946	Caucasian	Not reported	2008	Stage I	22415	Deceased	375	--
270c9a0b-d71a-4d4e-8686-f183412159f2	TCGA-BP-4761	TCGA-KIRC	Male	1947	Caucasian	Not reported	--	Stage III	21019	Survived	--	182
817a7f60-2d13-4372-9dcc-740da772740e	TCGA-UN-AAZ9	TCGA-KIRP	Female	1937	African descent	Not Hispanic or Latin American	--	Stage I	27851	Survived	--	548
66e2fda4-23de-49c6-bb89-82e9edc56e4b	TCGA-P4-AAVK	TCGA-KIRP	Male	1936	Caucasian	Hispanic or Latin American	--	Stage III	27073	Survived	--	1590
18524601-30d9-4dc6-a345-cbdb33349521	TCGA-B0-4827	TCGA-KIRC	Female	1925	Caucasian	Not Hispanic or Latin American	2004	Stage III	28467	Deceased	885	--
ed560804-50b9-488e-bfa9-33f20cb83106	TCGA-BQ-5890	TCGA-KIRP	Male	1940	Caucasian	Not Hispanic or Latin American	--	Stage III	25272	Survived	--	233
36ed3269-0a57-4c50-bbfa-cfd2a7b56d4f	TCGA-A3-3322	TCGA-KIRC	Male	1955	Caucasian	Not reported	--	Stage I	18754	Survived	--	1478
514af471-31d2-43fa-88dc-8639a5e97181	TCGA-B0-5712	TCGA-KIRC	Female	1936	African descent	Not Hispanic or Latin American	--	Stage IV	24988	Survived	--	2722
830626c5-891f-4b62-bc0a-68fbfb8bc2a8	TCGA-BP-4174	TCGA-KIRC	Male	1955	Caucasian	Not reported	--	Stage II	18054	Survived	--	1879
0db35585-c319-4feb-b157-41fa14f9aa11	TCGA-UZ-A9PP	TCGA-KIRP	Male	--	Caucasian	Not Hispanic or Latin American	--	Stage I	21915	Survived	--	3010
7f677700-65c8-4d17-b6ae-520869ba1bbd	TCGA-DW-5561	TCGA-KIRP	Male	1957	African descent	Not Hispanic or Latin American	--	Stage I	18744	Survived	--	414
88e7ce26-5b3f-4e4e-89b7-f706063fc467	TCGA-CZ-4863	TCGA-KIRC	Female	1955	Caucasian	Not Hispanic or Latin American	--	Stage III	18730	Survived	--	1928
f24b772a-147e-4889-be23-e4ea10824d66	TCGA-GL-7966	TCGA-KIRP	Female	1983	Caucasian	Not Hispanic or Latin American	--	Stage III	10428	Survived	--	112
4c3e4727-77f5-4374-9d83-ec86d61b02b2	TCGA-BP-5196	TCGA-KIRC	Male	1955	Caucasian	Not reported	--	Stage I	19719	Survived	--	1018
d599ff9b-66c7-4690-b37a-cb86bdda7782	TCGA-B0-4703	TCGA-KIRC	Male	1954	Caucasian	Not Hispanic or Latin American	2005	Stage IV	18921	Deceased	182	--
c01afa58-af3f-40f1-b4fe-36909ae3871e	TCGA-BP-4970	TCGA-KIRC	Male	1962	Asian	Not reported	--	Stage III	16228	Survived	--	433
38469030-8539-4c76-b53b-57073569501c	TCGA-BP-4795	TCGA-KIRC	Female	1933	Caucasian	Not reported	--	Stage I	27162	Survived	--	620
9f8aa332-e625-46f7-b77b-1fcb3ca99ee2	TCGA-KN-8430	TCGA-KICH	Male	1932	Caucasian	Not Hispanic or Latin American	--	Stage I	27467	Deceased	--	--
0e065977-9138-4aed-9c9f-24e475f214c4	TCGA-5P-A9KA	TCGA-KIRP	Male	1952	Caucasian	Not Hispanic or Latin American	--	Not reported	22545	Survived	--	395
226ce515-c12c-4195-bb5d-d6df2e135ff6	TCGA-CZ-4861	TCGA-KIRC	Male	1942	Caucasian	Not reported	2006	Stage II	23053	Deceased	446	--
136c95cd-febd-43f0-af35-125d3321a145	TCGA-A3-3365	TCGA-KIRC	Male	1960	Caucasian	Not reported	--	Stage I	16915	Survived	--	873
d97ac1d1-fc06-4e9b-b3ad-415582ff66f1	TCGA-BP-4975	TCGA-KIRC	Male	1966	Caucasian	Not Hispanic or Latin American	--	Stage I	14710	Survived	--	1433
2939c03a-6f3f-4f7b-b246-34361baadeb9	TCGA-CJ-5681	TCGA-KIRC	Female	1959	Caucasian	Not Hispanic or Latin American	2004	Stage IV	16121	Deceased	552	--
08a50ae7-179c-4241-8aed-79db6c218c90	TCGA-BQ-7046	TCGA-KIRP	Male	1941	Caucasian	Not reported	--	Stage I	22337	Survived	--	2948
83b3060c-2449-4581-88ef-817d126e4525	TCGA-KL-8323	TCGA-KICH	Female	1943	Caucasian	Not reported	2003	Stage III	20849	Deceased	1158	--
0843841b-afab-4831-9084-a850db85287c	TCGA-A4-7584	TCGA-KIRP	Male	1952	African descent	Not Hispanic or Latin American	--	Stage I	21782	Survived	--	650
3dd36758-04ad-4ba4-bf17-707649d6f1a0	TCGA-B0-4810	TCGA-KIRC	Male	1954	Caucasian	Not Hispanic or Latin American	2002	Stage III	17402	Deceased	478	--
1f298bcc-c8d0-43bd-8ca6-5c160922b607	TCGA-UZ-A9PR	TCGA-KIRP	Male	--	Caucasian	Not Hispanic or Latin American	--	Stage I	30681	Survived	--	2627
2d0f6d4f-acb9-4b45-a69d-c9a3f68c3732	TCGA-CW-5581	TCGA-KIRC	Male	1959	Caucasian	Not Hispanic or Latin American	--	Stage I	16195	Survived	--	2799
ec6aa756-c875-49f5-89e4-365b3f18b589	TCGA-BP-4965	TCGA-KIRC	Male	1959	Caucasian	Not reported	--	Stage I	16992	Survived	--	1871
ad4101b9-b9e3-4d41-8c88-424559012853	TCGA-Y8-A896	TCGA-KIRP	Male	1951	Caucasian	Not Hispanic or Latin American	--	Stage III	22750	Survived	--	567
dacfb24c-dc54-488c-9ad3-520ad061f1b5	TCGA-SX-A71U	TCGA-KIRP	Male	1954	Caucasian	Not Hispanic or Latin American	--	Stage I	21079	Survived	--	1357
fb3a387f-ebc6-4422-a782-5c19056f77f2	TCGA-B0-5104	TCGA-KIRC	Female	1912	Caucasian	Not Hispanic or Latin American	2009	Stage I	32872	Deceased	2752	--
e7c159b7-e7c3-4482-8e80-72402dc3fdb4	TCGA-BP-4163	TCGA-KIRC	Female	1942	Caucasian	Not reported	--	Stage III	21980	Survived	--	2839
466d039a-d4d3-4bf4-93a2-89039f397d0d	TCGA-GL-6846	TCGA-KIRP	Male	1944	Caucasian	Not Hispanic or Latin American	--	Stage IV	19012	Survived	--	5925
11d7cf4d-4ad2-4ce7-a1ac-3b729a8d566e	TCGA-G7-6795	TCGA-KIRP	Male	1952	Caucasian	Not Hispanic or Latin American	--	Stage I	20478	Survived	--	1194
a5790b81-5001-4d1a-97ad-0ec9fc658f44	TCGA-BP-4992	TCGA-KIRC	Male	1941	Caucasian	Not reported	--	Stage I	24438	Survived	--	501
7d35b1e4-8dcf-4caa-adce-e4b72a2a10ca	TCGA-B2-5633	TCGA-KIRC	Male	1954	Caucasian	Not Hispanic or Latin American	--	Stage I	20493	Survived	--	963
351fb9f4-a3b6-44d8-9fdc-5b0b582fda23	TCGA-AK-3431	TCGA-KIRC	Female	1942	Caucasian	Not Hispanic or Latin American	--	Stage II	22852	Deceased	2241	1853
5570758c-1f07-4ff9-a570-b7ae39d15a89	TCGA-2Z-A9JJ	TCGA-KIRP	Female	1942	Caucasian	Not Hispanic or Latin American	--	Stage I	25240	Survived	--	1213
6bebd839-7a72-4e1f-9b76-146bdc0c55fc	TCGA-GL-7773	TCGA-KIRP	Male	1948	Caucasian	Not Hispanic or Latin American	--	Stage I	23239	Survived	--	393
8ac7f218-bd7b-4dda-8879-2cec49748e42	TCGA-KL-8331	TCGA-KICH	Female	1956	Caucasian	Not reported	--	Stage II	17710	Survived	--	3010
c20b1007-0111-4ef6-9df5-14da6094fca1	TCGA-2Z-A9JE	TCGA-KIRP	Male	1951	Caucasian	Not Hispanic or Latin American	--	Stage I	21557	Survived	--	1728
46d34d0c-b8a2-4ebd-b9a0-5485904ecafa	TCGA-CJ-4890	TCGA-KIRC	Male	1933	Caucasian	Not Hispanic or Latin American	--	Stage IV	26604	Survived	--	3519
597c81a3-5820-48b0-9a9c-c45257c7ad70	TCGA-B2-5635	TCGA-KIRC	Male	1936	Caucasian	Not Hispanic or Latin American	--	Stage I	27183	Survived	--	755
39867756-0ef0-4408-a0e1-c85ae7adb8ee	TCGA-BP-4331	TCGA-KIRC	Male	1950	Caucasian	Not Hispanic or Latin American	2008	Stage I	19022	Deceased	2454	--
c91a4cc3-aaa9-4bc9-b157-e46551d334c8	TCGA-B0-5713	TCGA-KIRC	Female	1931	Caucasian	Not Hispanic or Latin American	--	Stage III	27644	Survived	--	2782
6c15b31b-6942-43a9-b698-701a61430e30	TCGA-MH-A856	TCGA-KIRP	Male	1958	Caucasian	Hispanic or Latin American	--	Stage I	20006	Survived	--	947
b87bc182-b1c7-4e8d-a34b-704431b1d8d0	TCGA-4A-A93Y	TCGA-KIRP	Female	1950	African descent	Not Hispanic or Latin American	--	Stage II	23226	Survived	--	352
8d769b38-862f-46e3-a426-d09f79f28de6	TCGA-B0-4821	TCGA-KIRC	Female	1934	Asian	Not Hispanic or Latin American	2005	Stage III	25013	Deceased	1230	--
73cb1350-7590-4f79-bb86-3f395466652e	TCGA-B2-5639	TCGA-KIRC	Male	1964	Caucasian	Not Hispanic or Latin American	--	Stage IV	17045	Deceased	1003	417
393abcf7-1155-4b32-85ca-cd44d259e4b4	TCGA-CZ-5461	TCGA-KIRC	Male	1954	Caucasian	Not Hispanic or Latin American	2006	Stage IV	19030	Deceased	330	330
54c9850c-9b67-42ea-a04b-16a88f786dfa	TCGA-BP-5201	TCGA-KIRC	Male	1945	Caucasian	Not Hispanic or Latin American	--	Stage IV	23125	Survived	--	951
0c409bc3-1893-4203-9d84-6c016f1960c3	TCGA-A4-8312	TCGA-KIRP	Male	1952	African descent	Not Hispanic or Latin American	--	Stage I	22231	Survived	--	708
f5759059-c0e3-4f1a-af96-5c7197d3c33c	TCGA-CZ-5987	TCGA-KIRC	Male	1946	Caucasian	Not Hispanic or Latin American	2007	Stage IV	21928	Deceased	445	--
dd35edfd-ee6c-461f-b2a6-2dff8324117c	TCGA-BP-4797	TCGA-KIRC	Male	1973	Caucasian	Not Hispanic or Latin American	--	Stage III	12508	Survived	--	1107
5db69ebe-38db-4ef3-b825-674b4a6ddaee	TCGA-CJ-5680	TCGA-KIRC	Female	1938	Caucasian	Not Hispanic or Latin American	2005	Stage IV	23778	Deceased	768	--
eda2b871-8a18-4854-92d8-d8d66fb127d8	TCGA-B8-4620	TCGA-KIRC	Female	1940	Caucasian	Not Hispanic or Latin American	--	Stage III	25786	Survived	--	777
07aa333c-8bfb-4bdd-ad86-912c099ca0a9	TCGA-B8-5551	TCGA-KIRC	Female	1945	African descent	Not Hispanic or Latin American	--	Stage I	23976	Survived	--	16
2272c592-b9b6-4483-9f7f-6e185699b900	TCGA-AL-3468	TCGA-KIRP	Male	1931	Caucasian	Not Hispanic or Latin American	--	Stage II	27205	Deceased	2331	1636
1db41963-a520-47f0-828c-ed5c626507b1	TCGA-IA-A40Y	TCGA-KIRP	Female	1951	Caucasian	Not Hispanic or Latin American	--	Stage III	21996	Survived	--	62
a5af1391-89d3-4f41-930e-7e8272afec98	TCGA-KL-8344	TCGA-KICH	Male	1956	Caucasian	Not reported	--	Stage III	18742	Survived	--	876
4e3334e2-918f-4005-bb5a-12a67c7c0380	TCGA-B0-5700	TCGA-KIRC	Male	1932	Caucasian	Not Hispanic or Latin American	--	Stage I	28184	Survived	--	1790
5722df9f-5631-476d-a11b-b3c1e9a40fbf	TCGA-CZ-5466	TCGA-KIRC	Male	1940	Not reported	Not reported	--	Stage III	24669	Survived	--	685
59278f79-4f42-4d1c-9007-3958486042fc	TCGA-B8-5550	TCGA-KIRC	Male	1939	Caucasian	Not Hispanic or Latin American	--	Stage III	25937	Survived	--	1476
dc43cfe0-8880-419f-946c-c0ad586e57ca	TCGA-CZ-4859	TCGA-KIRC	Female	1946	Caucasian	Not reported	--	Stage I	21842	Survived	--	1787
78ec8bc9-e502-4f5b-b0f6-893718650352	TCGA-B8-4619	TCGA-KIRC	Male	1952	Caucasian	Not Hispanic or Latin American	--	Stage I	21206	Survived	--	523
62613d1d-978f-4b9d-a9c6-ae28ab384e57	TCGA-BP-4983	TCGA-KIRC	Female	1939	Asian	Not reported	--	Stage III	24558	Survived	--	1413
3e976301-4042-4ac0-8f01-ef2f1a8161a6	TCGA-CJ-4639	TCGA-KIRC	Female	1955	Caucasian	Hispanic or Latin American	--	Stage II	18066	Survived	--	3229
77d8c2cf-6b27-417b-9d43-14c95e6f9b85	TCGA-B0-4841	TCGA-KIRC	Male	1941	Caucasian	Not Hispanic or Latin American	2004	Stage IV	23097	Deceased	204	--
8b3de981-66cc-4aa6-9800-9cca6f8e1554	TCGA-WN-A9G9	TCGA-KIRP	Male	1957	Caucasian	Not Hispanic or Latin American	--	Stage I	--	Survived	--	791
e8bb682e-60a1-4842-a732-74558256dff8	TCGA-A4-8311	TCGA-KIRP	Male	1952	Caucasian	Not Hispanic or Latin American	--	Stage I	22220	Survived	--	729
a7c1d88a-d3a2-4232-a0df-3bd48fc27cc0	TCGA-SX-A71R	TCGA-KIRP	Male	1959	Caucasian	Not Hispanic or Latin American	--	Stage I	18742	Survived	--	1457
1bf54408-b5cb-45dc-ad03-ef2866a0ff59	TCGA-BQ-7059	TCGA-KIRP	Male	1939	Caucasian	Not Hispanic or Latin American	--	Stage I	26136	Survived	--	232
39847790-c951-4f9d-b23c-88c7f44d20a0	TCGA-P4-AAVL	TCGA-KIRP	Male	1925	Caucasian	Hispanic or Latin American	2011	Stage III	31082	Deceased	487	--
4c44f4a4-1529-4897-9f69-c8e6c705f905	TCGA-A3-3385	TCGA-KIRC	Female	1961	Caucasian	Not Hispanic or Latin American	--	Stage I	17114	Survived	--	1993
85fcd432-abf4-4bb7-8039-2de41477cb44	TCGA-BQ-5875	TCGA-KIRP	Female	1938	Caucasian	Not reported	--	Stage III	24153	Survived	--	2639
818022ea-123e-438d-9671-542f479028f2	TCGA-CJ-4875	TCGA-KIRC	Male	1937	Caucasian	Not Hispanic or Latin American	--	Stage IV	24510	Deceased	3554	2353
c0e26587-3191-4396-a20b-da9e7de213f4	TCGA-BP-4342	TCGA-KIRC	Male	1924	Caucasian	Not reported	2009	Stage II	29032	Deceased	2256	--
7bde24e1-8dc8-4359-827e-ffaef72898ef	TCGA-SX-A7SN	TCGA-KIRP	Male	1960	Caucasian	Not Hispanic or Latin American	--	Stage I	19116	Survived	--	578
942c0088-c9a0-428c-a879-e16f8c5bfdb8	TCGA-CJ-4642	TCGA-KIRC	Male	1958	Caucasian	Not Hispanic or Latin American	--	Stage II	17367	Survived	--	3205
b10eb61b-50b8-4df5-8c46-386a1b58c6a6	TCGA-CZ-4862	TCGA-KIRC	Male	1960	Caucasian	Not Hispanic or Latin American	--	Stage I	17077	Survived	--	3271
fdfaf862-46a4-4792-8487-810c6d1f9093	TCGA-BP-4330	TCGA-KIRC	Female	1942	African descent	Hispanic or Latin American	--	Stage III	22239	Survived	--	1888
6b033bf5-4ad9-419f-9d2c-63e2e8c80066	TCGA-G6-A8L8	TCGA-KIRC	Female	1946	African descent	Not Hispanic or Latin American	--	Stage I	22649	Deceased	1091	474
037c691e-6320-451b-9276-78459f1b705c	TCGA-BP-4352	TCGA-KIRC	Female	1933	Caucasian	Not Hispanic or Latin American	2007	Stage IV	27253	Deceased	344	--
b428463a-75d5-4663-a53b-ec2993795cc0	TCGA-B8-4151	TCGA-KIRC	Female	1958	Caucasian	Hispanic or Latin American	--	Stage III	18760	Survived	--	1299
b602a73b-809c-44c6-a787-d496705e7ae8	TCGA-CZ-5467	TCGA-KIRC	Female	1921	Caucasian	Not Hispanic or Latin American	2007	Stage III	31473	Deceased	73	--
ea854858-1dad-4b01-8e58-f19e6a7c41a3	TCGA-DV-5574	TCGA-KIRC	Male	1971	Caucasian	Not Hispanic or Latin American	--	Stage I	13517	Survived	--	2016
fc052a9d-0134-46ce-af98-4703b61d63c4	TCGA-DV-5569	TCGA-KIRC	Female	1980	Caucasian	Not Hispanic or Latin American	--	Stage I	10698	Survived	--	355
74749fe8-f5d0-4d0d-8c7a-e56eba6503b3	TCGA-CZ-5455	TCGA-KIRC	Male	1943	Caucasian	Not Hispanic or Latin American	2007	Stage IV	23150	Deceased	561	--
46194f7f-af16-42b7-bef6-9c0d1e8f9b0d	TCGA-B0-5075	TCGA-KIRC	Female	1928	Caucasian	Not Hispanic or Latin American	2006	Stage III	28205	Deceased	637	--
03301d0d-efee-4087-9fff-d1d4f53a924c	TCGA-BQ-5887	TCGA-KIRP	Male	1955	Caucasian	Not reported	--	Stage III	19747	Survived	--	771
b764e6a1-da21-4593-b133-25827c5b8d47	TCGA-B0-4817	TCGA-KIRC	Male	1921	Caucasian	Not Hispanic or Latin American	2004	Stage III	29873	Deceased	1019	--
53dede5a-4423-4da5-bc1e-e5e98b011e36	TCGA-CJ-4873	TCGA-KIRC	Female	1919	Caucasian	Not Hispanic or Latin American	--	Stage III	31096	Survived	--	2259
d2748e35-4719-43c1-a533-b6b0cd9688c3	TCGA-G7-7502	TCGA-KIRP	Male	1928	Caucasian	Not Hispanic or Latin American	--	Stage I	30346	Survived	--	786
33c09cd7-2ccc-4a69-b738-79dfd9aa149d	TCGA-5P-A9KE	TCGA-KIRP	Male	1941	Caucasian	Not Hispanic or Latin American	--	Not reported	25805	Survived	--	824
f8ac66a2-16a5-4230-986b-1da8d0a61361	TCGA-A4-A5XZ	TCGA-KIRP	Female	1947	Caucasian	Not Hispanic or Latin American	--	Stage II	24006	Survived	--	479
58dee518-f105-4620-996e-3fb6177aa493	TCGA-B0-4836	TCGA-KIRC	Male	1942	Caucasian	Not Hispanic or Latin American	2006	Stage IV	22488	Deceased	1238	--
f38a6799-11e0-471c-834e-0d97e00aec07	TCGA-A3-A8OU	TCGA-KIRC	Female	1937	African descent	Not Hispanic or Latin American	--	Stage I	27377	Survived	--	0
0ff579a1-e295-408d-b194-febbca798e34	TCGA-DV-5575	TCGA-KIRC	Female	1955	Caucasian	Not Hispanic or Latin American	--	Stage I	19022	Survived	--	1729
5dc807f2-f4f0-434b-b099-43cf41d99cbd	TCGA-BP-5192	TCGA-KIRC	Male	1948	Caucasian	Not reported	--	Stage I	21891	Survived	--	714
e7c8a4d3-d51e-482a-9045-4de9c9f29945	TCGA-B0-5106	TCGA-KIRC	Male	1940	Caucasian	Not Hispanic or Latin American	2008	Stage I	23547	Deceased	1598	--
69fb3eff-a32c-48e1-aab8-645ef31d163a	TCGA-A3-3367	TCGA-KIRC	Male	1934	Caucasian	Not Hispanic or Latin American	--	Stage I	26489	Survived	--	2270
e5eca191-f585-490d-81e3-9cced1047093	TCGA-BP-4334	TCGA-KIRC	Male	1947	Caucasian	Not reported	--	Stage III	20609	Deceased	645	645
830b8de5-fd22-49d6-ad1d-c7cf619bf0ac	TCGA-CJ-4905	TCGA-KIRC	Female	1944	Caucasian	Not Hispanic or Latin American	--	Stage I	22864	Survived	--	1496
6205c2d8-d431-4c4c-8ac6-ee407170e833	TCGA-CZ-5469	TCGA-KIRC	Male	1966	Caucasian	Not Hispanic or Latin American	2009	Stage II	15242	Deceased	946	--
ec3b2a30-fcf6-45ef-bd9d-e6089a237c0f	TCGA-CJ-4904	TCGA-KIRC	Female	1946	Caucasian	Not Hispanic or Latin American	--	Stage IV	22036	Survived	--	3302
30208a4c-ecb0-4b3c-a349-87e1c1f43e85	TCGA-BP-5170	TCGA-KIRC	Male	1949	Caucasian	Not reported	--	Stage I	20229	Survived	--	2412
7d0dbcb3-d024-4c20-a545-430c0d067fda	TCGA-F9-A97G	TCGA-KIRP	Male	1934	Asian	Not Hispanic or Latin American	--	Stage III	29156	Survived	--	13
e4769374-7d4d-4aaf-b6fe-a01da59ee713	TCGA-B0-4833	TCGA-KIRC	Female	1921	Caucasian	Not Hispanic or Latin American	2009	Stage I	30190	Deceased	2386	--
81bc5a6f-3584-486d-8a8f-d976dcb666ff	TCGA-4A-A93W	TCGA-KIRP	Female	1947	Caucasian	Not Hispanic or Latin American	--	Stage I	24117	Survived	--	4
326745d8-98ca-4f4d-b217-96aea9faa1ad	TCGA-B0-5812	TCGA-KIRC	Male	1950	Caucasian	Not Hispanic or Latin American	--	Stage I	19600	Survived	--	3834
ae55b2d3-62a1-419e-9f9a-5ddfac356db4	TCGA-B0-5117	TCGA-KIRC	Male	1970	Caucasian	Not Hispanic or Latin American	--	Stage I	14612	Survived	--	1608
452135f2-6de6-4593-a091-ddf6344ee431	TCGA-KL-8328	TCGA-KICH	Male	1943	Caucasian	Not reported	--	Stage II	21976	Survived	--	3127
c689ae1d-4a6b-45db-b4d1-6b34c5c61522	TCGA-KL-8342	TCGA-KICH	Female	1961	Caucasian	Not reported	--	Stage II	16550	Survived	--	2248
2030e10b-a4c2-460f-9e29-90c8a76ea05e	TCGA-MH-A55W	TCGA-KIRP	Male	1961	African descent	Not Hispanic or Latin American	--	Stage I	18573	Survived	--	1043
3d3e1db7-716b-4f0f-84b9-2d2f11c9390f	TCGA-HE-7130	TCGA-KIRP	Female	--	Not reported	Not reported	--	Stage III	--	Survived	--	1770
2304b8f8-4cb4-46c5-a88e-c78d97b06d6b	TCGA-A3-3352	TCGA-KIRC	Male	1931	Caucasian	Not Hispanic or Latin American	2006	Stage III	--	Deceased	561	--
df3b1215-58fd-49c7-8f99-3a854d6cc667	TCGA-B0-4693	TCGA-KIRC	Female	1937	Caucasian	Not Hispanic or Latin American	2009	Stage III	26659	Deceased	77	--
0ec3caa1-7c51-417b-a89c-18e9fceb80c4	TCGA-KO-8416	TCGA-KICH	Male	1966	Caucasian	Not Hispanic or Latin American	--	Stage III	15261	Survived	--	2752
725802a7-d2cb-4c4a-b20e-980ca1056ada	TCGA-IA-A83S	TCGA-KIRP	Male	1922	Caucasian	Not Hispanic or Latin American	2010	Not reported	29677	Deceased	2609	--
cd54aff9-bee4-41aa-b347-48f8684dcece	TCGA-SX-A7SR	TCGA-KIRP	Male	1946	Caucasian	Not Hispanic or Latin American	--	Stage II	24237	Survived	--	805
98dea82b-46f9-4b77-be8a-06669bcf731b	TCGA-B8-5549	TCGA-KIRC	Male	1957	Caucasian	Not Hispanic or Latin American	--	Stage I	19561	Survived	--	194
886ce4a0-a78d-4976-9667-041385c9b6d5	TCGA-IZ-A6M8	TCGA-KIRP	Male	1944	African descent	Not Hispanic or Latin American	--	Stage I	25545	Survived	--	497
c0171d4e-9970-44f4-8502-f31f0e145643	TCGA-AK-3445	TCGA-KIRC	Male	1937	Caucasian	Not Hispanic or Latin American	--	Stage III	25494	Survived	--	2392
0c151271-2cf9-43f4-9e9b-fe927de43131	TCGA-IA-A40X	TCGA-KIRP	Female	1962	African descent	Not Hispanic or Latin American	--	Stage I	18239	Survived	--	608
95cb399c-0a6f-4bd8-8146-36f367f30611	TCGA-2Z-A9J2	TCGA-KIRP	Female	1937	Caucasian	Not Hispanic or Latin American	--	Stage I	26134	Survived	--	1795
d7abeadd-ca92-4e18-ae06-70baf9ce42e0	TCGA-AK-3447	TCGA-KIRC	Male	1923	Caucasian	Not Hispanic or Latin American	--	Stage II	30676	Survived	--	1217
9d202594-7697-443f-a1ee-d8e7b28ecb8f	TCGA-B0-4849	TCGA-KIRC	Male	1953	Caucasian	Not Hispanic or Latin American	2004	Stage III	18843	Deceased	69	--
4fca10bd-988a-47f9-8ed5-037c0d59d70c	TCGA-A3-3324	TCGA-KIRC	Male	1955	Caucasian	Not reported	--	Stage I	18843	Survived	--	1186
0df9ec46-d600-4845-9d00-2dc2732c68d1	TCGA-GK-A6C7	TCGA-KIRC	Female	1936	African descent	Not Hispanic or Latin American	--	Stage I	28107	Survived	--	61
b5f6a0e3-f9ac-475f-9a34-b8b8834f1779	TCGA-KO-8410	TCGA-KICH	Female	1930	Caucasian	Not Hispanic or Latin American	--	Stage I	27084	Survived	--	3136
4298ccdb-2e6d-4267-822d-75b021364084	TCGA-B0-4710	TCGA-KIRC	Female	1935	Caucasian	Not Hispanic or Latin American	--	Stage III	27396	Survived	--	1755
e04bd954-b207-481d-84fd-6c4f8d070e8a	TCGA-BP-4763	TCGA-KIRC	Female	1925	Caucasian	Not reported	2007	Stage I	29150	Deceased	1270	--
73512f9d-c6e4-446f-8e31-666c6af44da5	TCGA-B0-5121	TCGA-KIRC	Male	1954	Caucasian	Not Hispanic or Latin American	--	Stage I	20635	Survived	--	1485
42d044ae-1416-477d-ac80-779c49bc8d35	TCGA-AL-3472	TCGA-KIRP	Male	1951	African descent	Not Hispanic or Latin American	--	Not reported	21166	Survived	--	2029
467bf226-a646-4217-bce6-8d0f11c756eb	TCGA-CZ-5456	TCGA-KIRC	Male	1949	Caucasian	Not reported	--	Stage II	21164	Survived	--	2422
ffb88267-1a97-41c9-ae25-6c6cefaf9dd9	TCGA-BP-5190	TCGA-KIRC	Male	1946	Caucasian	Not Hispanic or Latin American	--	Stage I	22285	Survived	--	1011
048ebea2-47ef-4359-9213-a1b7e4fdecf0	TCGA-Y8-A898	TCGA-KIRP	Male	1944	Caucasian	Not Hispanic or Latin American	--	Stage I	25344	Survived	--	475
3280a078-8841-4c5c-a361-b58bc37b965c	TCGA-B8-A54H	TCGA-KIRC	Female	1943	African descent	Not reported	--	Stage II	25243	Survived	--	256
a8e0f80a-7049-4b5a-af21-cb6421286271	TCGA-BP-4351	TCGA-KIRC	Female	1955	Caucasian	Not reported	--	Stage III	18662	Survived	--	970
2913faf2-d722-4993-8e9a-3c4cc1f5d82b	TCGA-BP-4337	TCGA-KIRC	Female	1927	Caucasian	Not reported	2003	Stage III	27906	Deceased	2	--
453085d8-2998-4629-9b2d-641e57d1a497	TCGA-BP-4173	TCGA-KIRC	Male	1957	Caucasian	Not reported	--	Stage II	17449	Survived	--	1893
e002c248-0db9-4f94-8590-88dfd6c0c642	TCGA-CJ-4876	TCGA-KIRC	Male	1947	Caucasian	Hispanic or Latin American	--	Stage II	20993	Survived	--	1955
5195c9ac-b649-49f8-8750-f9a4787e8e52	TCGA-2Z-A9J3	TCGA-KIRP	Male	1941	Caucasian	Not Hispanic or Latin American	2012	Stage II	24626	Deceased	1771	--
3db2fdbb-ef0e-4a5d-8fb2-4e6756d29b17	TCGA-2Z-A9JQ	TCGA-KIRP	Male	1946	Caucasian	Not Hispanic or Latin American	--	Stage I	24244	Survived	--	778
d7155ce6-e6b2-4c1f-8233-85f0d63e8e11	TCGA-AK-3443	TCGA-KIRC	Male	1961	Caucasian	Not Hispanic or Latin American	--	Stage II	16578	Survived	--	1423
50f29fc7-c111-4101-b970-b1e1dd3388cf	TCGA-A3-3320	TCGA-KIRC	Female	1953	Caucasian	Not reported	--	Stage I	19138	Survived	--	1508
8f936d84-3b81-4d1c-aca1-93f5c86ed1bc	TCGA-BP-5198	TCGA-KIRC	Male	1936	Caucasian	Not reported	--	Stage III	26360	Survived	--	603
a121406a-30b2-4717-ae96-edcb17d911e2	TCGA-B9-4115	TCGA-KIRP	Male	1956	African descent	Not Hispanic or Latin American	--	Stage I	19571	Survived	--	803
648fecca-4946-4880-8359-6801cbb4fc0d	TCGA-KO-8403	TCGA-KICH	Male	1956	Caucasian	Not Hispanic or Latin American	--	Stage I	18171	Survived	--	3208
7f715b2e-fe7c-4a6e-95d1-fcab93b58f21	TCGA-G7-6789	TCGA-KIRP	Female	1951	Caucasian	Not Hispanic or Latin American	2004	Stage IV	19593	Deceased	122	--
efb088d9-fa88-4caf-a837-20d76efc83f6	TCGA-B0-4838	TCGA-KIRC	Female	1934	Caucasian	Not Hispanic or Latin American	2005	Stage I	25268	Deceased	834	--
a43401ae-14cd-4f57-946b-9a9c073f2a47	TCGA-CZ-5982	TCGA-KIRC	Female	1946	Caucasian	Not reported	--	Stage I	21592	Survived	--	2439
8c6720ef-4f85-4d22-b9bc-6745b55bf6d8	TCGA-B8-4154	TCGA-KIRC	Female	1937	Caucasian	Not Hispanic or Latin American	--	Stage I	26882	Survived	--	1380
421e845c-f4e8-4f46-bff6-9aaa9d208e81	TCGA-BQ-7061	TCGA-KIRP	Female	1928	Caucasian	Not Hispanic or Latin American	--	Stage I	30662	Survived	--	218
64b35577-c430-4f11-8a34-965921e3a37d	TCGA-IA-A40U	TCGA-KIRP	Male	1955	Caucasian	Not Hispanic or Latin American	--	Stage III	20463	Survived	--	511
0a6a375b-3b61-453f-a64a-db3d49352949	TCGA-B0-5707	TCGA-KIRC	Female	1965	Caucasian	Not Hispanic or Latin American	--	Stage I	14598	Survived	--	3744
692f9978-ada8-43aa-81a1-108464c81609	TCGA-CJ-4903	TCGA-KIRC	Male	1956	Caucasian	Not Hispanic or Latin American	--	Stage I	18510	Survived	--	1559
45da55a6-aa58-49af-9a28-95b8ca2d4614	TCGA-5P-A9JY	TCGA-KIRP	Male	1927	Caucasian	Not Hispanic or Latin American	2010	Not reported	28881	Deceased	1508	--
3fa6c93e-e7fe-402c-9526-c81411aa0920	TCGA-CJ-5679	TCGA-KIRC	Male	1930	Caucasian	Not Hispanic or Latin American	2004	Stage III	26858	Deceased	679	--
5358b8c7-d69c-4485-9420-03416564187b	TCGA-BP-5181	TCGA-KIRC	Female	1948	Caucasian	Not reported	--	Stage I	21514	Survived	--	1495
844d8b94-59b0-4787-97eb-474e3aa3e022	TCGA-BP-4160	TCGA-KIRC	Male	1935	Caucasian	Hispanic or Latin American	--	Stage III	24720	Survived	--	2881
cf77fe39-0b4a-4b38-b563-2a244b9fb5c0	TCGA-B0-4845	TCGA-KIRC	Male	1933	Caucasian	Not Hispanic or Latin American	2008	Stage IV	25582	Deceased	1986	--
b08dfba8-6afb-4217-9259-72be6f1f3363	TCGA-KN-8426	TCGA-KICH	Male	1956	Caucasian	Not reported	--	Stage IV	18345	Survived	--	108
4b2ec8aa-8460-440e-b75b-6b92ae7a3ffc	TCGA-DV-5566	TCGA-KIRC	Female	1940	Caucasian	Not Hispanic or Latin American	--	Stage I	24717	Survived	--	1398
f1ed9155-ea54-4435-8920-0df8ed7febda	TCGA-BP-5200	TCGA-KIRC	Male	1964	Caucasian	Not reported	--	Stage II	16197	Survived	--	1063
7dcb37f9-c059-4ed3-a616-963ad4ada6d7	TCGA-DZ-6135	TCGA-KIRP	Male	1961	Not reported	Not reported	--	Stage I	16468	Survived	--	2269
78412f82-cc55-43d5-96ca-1d02cf957725	TCGA-GL-A59R	TCGA-KIRP	Male	1933	Caucasian	Not Hispanic or Latin American	--	Stage III	29046	Survived	--	378
79e469c5-c18c-4c20-aaa2-8866623229d9	TCGA-BP-4343	TCGA-KIRC	Male	1939	Caucasian	Not reported	2008	Stage III	23498	Deceased	1912	--
63643ba6-bed9-4c36-91dd-a18105fadc06	TCGA-KL-8336	TCGA-KICH	Female	1955	Caucasian	Not reported	2008	Stage IV	18821	Deceased	920	--
f2801b21-5444-4cc3-a642-c60c6d82cd3d	TCGA-CZ-5454	TCGA-KIRC	Male	1943	Caucasian	Not Hispanic or Latin American	2007	Stage IV	23083	Deceased	722	--
e9847c37-0d93-47bf-b669-c7f7a1abfa88	TCGA-BP-4332	TCGA-KIRC	Male	1966	Caucasian	Not reported	--	Stage III	13404	Survived	--	1133
822cf6c1-dd65-4814-94b1-0c335208ad9b	TCGA-CJ-5678	TCGA-KIRC	Male	1941	African descent	Not Hispanic or Latin American	2004	Stage IV	22944	Deceased	574	--
f6d3e963-5bff-40f6-8430-1c6fb5ec6503	TCGA-B0-5399	TCGA-KIRC	Male	1964	Caucasian	Not Hispanic or Latin American	--	Stage I	17145	Survived	--	1411
dc8dbf62-b687-4362-8839-2fac69703f64	TCGA-KO-8408	TCGA-KICH	Male	1957	Caucasian	Not Hispanic or Latin American	2005	Stage III	17299	Deceased	507	--
c4247ccb-8201-428e-a2e7-b5104f095588	TCGA-CZ-5458	TCGA-KIRC	Male	1963	Caucasian	Not reported	--	Stage III	15790	Survived	--	2789
71b35cd8-ecee-4599-bb24-b1ef78118423	TCGA-B9-4117	TCGA-KIRP	Female	1961	African descent	Not Hispanic or Latin American	--	Not reported	17622	Survived	--	14
7080bc0a-709e-4871-9539-4616f194e310	TCGA-CW-5583	TCGA-KIRC	Female	1952	Caucasian	Not reported	--	Stage I	18666	Survived	--	2489
f3a921d5-7a6d-4a6e-893b-a5e1d3f4750b	TCGA-B0-5110	TCGA-KIRC	Female	1938	Caucasian	Not Hispanic or Latin American	--	Stage I	25976	Survived	--	2009
8be7d2e2-1504-49d0-bbdd-893d3d12e072	TCGA-BP-4341	TCGA-KIRC	Male	1936	Caucasian	Not reported	2007	Stage III	24727	Deceased	1589	--
4ee14e95-09d8-4512-b358-3e0e7cb74c9a	TCGA-B0-4844	TCGA-KIRC	Male	1944	Caucasian	Not Hispanic or Latin American	2004	Stage IV	22220	Deceased	313	--
f2b93fbd-5848-46e2-978e-ba84e810e0dc	TCGA-CJ-6031	TCGA-KIRC	Male	1949	Caucasian	Not Hispanic or Latin American	--	Stage I	19905	Survived	--	1906
e0127e51-43ba-4536-bc9d-004591f9c627	TCGA-CZ-5462	TCGA-KIRC	Male	1924	Caucasian	Not reported	2007	Stage IV	30659	Deceased	311	--
e7bbc8a9-b63b-4967-812b-f9280a5e181e	TCGA-BP-4167	TCGA-KIRC	Male	1944	Caucasian	Not reported	--	Stage III	21901	Survived	--	2718
1ef4526a-8089-46ba-aa7f-4300ab6bbbe9	TCGA-PJ-A5Z8	TCGA-KIRP	Female	1953	Caucasian	Not Hispanic or Latin American	--	Stage I	21968	Survived	--	600
e6831884-67a2-4ce4-bdfa-49e5e208eae8	TCGA-KV-A6GD	TCGA-KIRP	Male	1928	Caucasian	Not Hispanic or Latin American	--	Stage I	31217	Survived	--	560
ac8cadda-c01e-4e8d-9557-38e0a36c3210	TCGA-P4-A5EB	TCGA-KIRP	Male	1923	Caucasian	Not Hispanic or Latin American	--	Stage I	30395	Survived	--	3015
9fd9104b-a26d-44c7-bb45-f1edd76d0aa0	TCGA-CW-5590	TCGA-KIRC	Male	1953	Caucasian	Not Hispanic or Latin American	2006	Stage IV	18905	Deceased	1075	--
bf768635-b809-4df4-a4e6-7495e66aa227	TCGA-B0-5709	TCGA-KIRC	Female	1941	Caucasian	Not Hispanic or Latin American	--	Stage III	22843	Survived	--	3974
da0289c6-ff84-4063-ba99-a0d0a338f6cd	TCGA-2Z-A9J5	TCGA-KIRP	Male	1926	Caucasian	Not Hispanic or Latin American	--	Stage II	29275	Survived	--	3050
d4c9fd69-d447-4607-be1e-2b5f7ec15f90	TCGA-BQ-5891	TCGA-KIRP	Female	1952	Caucasian	Not Hispanic or Latin American	--	Stage III	20945	Survived	--	29
a1ad1a96-2b6e-4c86-9d71-e176b902e9d4	TCGA-B8-5545	TCGA-KIRC	Male	1968	African descent	Not Hispanic or Latin American	--	Stage I	15376	Survived	--	1525
10c03d66-a290-4e46-9018-2932a236eb09	TCGA-A3-3313	TCGA-KIRC	Male	1946	African descent	Not reported	2007	Stage I	21556	Deceased	735	735
883c37e2-c723-45d7-9e25-082d1bec34e2	TCGA-CZ-5986	TCGA-KIRC	Male	1945	Caucasian	Not reported	--	Stage I	22456	Survived	--	373
62cf9546-b932-4a5e-bc9b-4103506d296d	TCGA-B0-5705	TCGA-KIRC	Female	1937	Caucasian	Not Hispanic or Latin American	--	Stage I	23746	Survived	--	4537
5cf9d9fe-2823-4577-a150-27b970f38a5d	TCGA-AK-3460	TCGA-KIRC	Male	1949	Caucasian	Not Hispanic or Latin American	--	Stage I	21281	Survived	--	2508
a682a2a3-dc53-4b7e-8929-07215737ec5e	TCGA-B2-5641	TCGA-KIRC	Male	1931	Caucasian	Not Hispanic or Latin American	--	Stage I	28953	Survived	--	656
ba96288c-60d3-4e56-8940-90c5b22d4ddc	TCGA-BP-4164	TCGA-KIRC	Female	1951	Caucasian	Not reported	2004	Stage III	18898	Deceased	992	--
a8ec7a72-7e3a-41cc-9eb7-62e7a0642a20	TCGA-A4-8518	TCGA-KIRP	Male	1964	Caucasian	Not Hispanic or Latin American	--	Stage I	17713	Survived	--	600
b7143068-4afd-47ed-9e08-1894f886c503	TCGA-B0-5109	TCGA-KIRC	Male	1940	Caucasian	Not Hispanic or Latin American	2010	Stage III	25428	Deceased	587	--
4bec3959-d59d-4e80-855c-f044a5780780	TCGA-5P-A9K3	TCGA-KIRP	Male	1948	Caucasian	Not Hispanic or Latin American	2008	Not reported	21829	Deceased	471	--
3972ae59-114d-4e5d-89fa-f7675da417ab	TCGA-CJ-4907	TCGA-KIRC	Male	1948	Caucasian	Not Hispanic or Latin American	--	Stage III	21208	Survived	--	1499
c7e9ba09-0826-466c-8555-6595de31ed31	TCGA-A3-3362	TCGA-KIRC	Female	1945	Caucasian	Not Hispanic or Latin American	--	Stage I	21988	Survived	--	1559
1957fb63-be5a-4889-bbae-01dfbd286c4a	TCGA-UZ-A9PN	TCGA-KIRP	Male	--	Caucasian	Not Hispanic or Latin American	--	Stage III	19724	Deceased	1136	667
ac20ec63-1615-4cd3-966f-1e786077af75	TCGA-A4-A5DU	TCGA-KIRP	Female	1967	Caucasian	Not Hispanic or Latin American	--	Stage I	16779	Survived	--	496
5c9a6c40-982e-45c7-98d3-aeb6cad16986	TCGA-B9-4113	TCGA-KIRP	Male	1938	African descent	Not Hispanic or Latin American	2006	Stage I	23613	Deceased	1536	--
4978eb8d-4a38-470b-9a00-6dd3aada1aa9	TCGA-BP-4338	TCGA-KIRC	Male	1960	Caucasian	Not reported	--	Stage I	15891	Survived	--	2859
519615e6-8847-4ed5-a409-b6b183ff3f06	TCGA-V9-A7HT	TCGA-KIRP	Male	1942	African descent	Not Hispanic or Latin American	--	Stage II	24610	Survived	--	965
cefaf325-24d3-4b69-bddb-1ceb66f9a693	TCGA-5P-A9K8	TCGA-KIRP	Female	1959	Caucasian	Not Hispanic or Latin American	--	Not reported	18880	Survived	--	1309
d4815225-0ac0-4295-a70d-74162066c0bd	TCGA-A3-3343	TCGA-KIRC	Male	1926	Caucasian	Not Hispanic or Latin American	--	Stage II	28930	Survived	--	945
bcf26561-6e11-441c-955e-181ef2e68b41	TCGA-B0-5099	TCGA-KIRC	Female	1914	Caucasian	Not Hispanic or Latin American	2003	Stage III	32364	Deceased	485	--
e719b7f3-27c4-4017-9d34-a660776c2cd7	TCGA-BP-4799	TCGA-KIRC	Male	1937	Caucasian	Not reported	2010	Stage III	25842	Deceased	1133	--
4668cb20-6396-4d98-90d8-61814697d16a	TCGA-G7-6792	TCGA-KIRP	Male	1967	African descent	Not Hispanic or Latin American	--	Stage I	14664	Survived	--	2765
fa543627-9e3c-4af9-bb33-f0cdd9fbc9cc	TCGA-AK-3451	TCGA-KIRC	Male	1958	Caucasian	Not Hispanic or Latin American	--	Stage II	17859	Survived	--	2868
aa2b6825-3352-4d47-a637-48452f4a958b	TCGA-MM-A84U	TCGA-KIRC	Female	1955	African descent	Not Hispanic or Latin American	--	Stage I	21375	Survived	--	700
7e620e32-54c5-4f5b-9e18-211516a3eb41	TCGA-B8-A54I	TCGA-KIRC	Male	1964	African descent	Not Hispanic or Latin American	--	Stage I	17722	Survived	--	150
82f069c4-7928-4b7b-8a42-114db7de0501	TCGA-BP-4994	TCGA-KIRC	Male	1953	Caucasian	Not reported	--	Stage I	19946	Survived	--	1308
f459ce8d-d245-4feb-a1fe-c273b02feaaf	TCGA-PJ-A5Z9	TCGA-KIRP	Female	1932	Caucasian	Not Hispanic or Latin American	--	Stage I	29365	Survived	--	540
265f1d03-fa56-4f9a-a1d2-33f123558729	TCGA-BP-5175	TCGA-KIRC	Male	1944	Caucasian	Not reported	--	Stage I	21949	Survived	--	932
33cf0893-0411-4758-aa90-602bfedf0850	TCGA-BP-4807	TCGA-KIRC	Male	1966	Caucasian	Not reported	--	Stage I	15360	Survived	--	211
b81243b3-5130-4268-9883-07e547b8d728	TCGA-BP-4325	TCGA-KIRC	Female	1937	Caucasian	Not reported	--	Stage I	23588	Survived	--	2964
9ab5714c-19bc-4022-b1ce-ef18ee2a9cb2	TCGA-BQ-5880	TCGA-KIRP	Male	1927	Caucasian	Not reported	2009	Stage III	29053	Deceased	1314	--
0bd313f0-0b6d-4bf3-aae2-6496d71d6d3a	TCGA-B0-4848	TCGA-KIRC	Male	1950	Caucasian	Not Hispanic or Latin American	2006	Stage III	19892	Deceased	883	--
c285ada3-fd49-46a5-882f-b6c352572e2a	TCGA-BP-4985	TCGA-KIRC	Male	1934	Caucasian	Not reported	2008	Stage III	26611	Deceased	952	--
57070e5b-0eb5-44b7-abb3-3007fa34543a	TCGA-BP-5009	TCGA-KIRC	Male	1955	Caucasian	Not Hispanic or Latin American	2009	Stage I	19052	Deceased	1092	--
4f81a5b5-b570-4331-a51b-4a65fc2e4e13	TCGA-IZ-8196	TCGA-KIRP	Male	1962	Caucasian	Not Hispanic or Latin American	--	Stage I	18540	Survived	--	649
c04c5ac6-5b44-4e47-bf52-e4d92d76eea5	TCGA-A3-3335	TCGA-KIRC	Male	1965	Caucasian	Not Hispanic or Latin American	--	Stage II	15250	Survived	--	1886
58ef1a13-a549-4043-b66c-5327bfcbd2e6	TCGA-CW-5589	TCGA-KIRC	Male	1952	Caucasian	Not Hispanic or Latin American	--	Stage I	19312	Survived	--	2378
2e930925-9eaf-4469-9328-35241f60eddd	TCGA-SX-A7SL	TCGA-KIRP	Male	1938	Not reported	Not reported	--	Stage I	27063	Survived	--	823
56f883d7-3ce1-47be-a581-f7337d06d359	TCGA-A4-A5Y1	TCGA-KIRP	Male	1937	Caucasian	Not Hispanic or Latin American	--	Stage III	27541	Deceased	395	87
d8b73891-05e0-4ab5-ab2e-0acf8d03595c	TCGA-A4-7734	TCGA-KIRP	Female	1958	Caucasian	Not Hispanic or Latin American	--	Stage I	19612	Survived	--	27
6b0c1e54-b643-4490-927e-d5c91957d5d2	TCGA-CZ-5459	TCGA-KIRC	Male	1943	Caucasian	Not reported	--	Stage III	23318	Survived	--	1683
d62d39f9-c896-4758-a785-e236f0154f14	TCGA-B8-5162	TCGA-KIRC	Male	1948	Caucasian	Not Hispanic or Latin American	--	Stage II	23008	Survived	--	36
305eaef4-4644-46e3-a696-d2e4a972f691	TCGA-CZ-4865	TCGA-KIRC	Female	1936	Caucasian	Not Hispanic or Latin American	2006	Stage I	25709	Deceased	166	--
513a4de3-427d-4823-8644-b6faf69a137f	TCGA-BP-4344	TCGA-KIRC	Female	1931	Caucasian	Not reported	--	Stage I	27561	Survived	--	1666
3be0bc1d-d81f-4769-b650-8cc8858e45db	TCGA-B0-5098	TCGA-KIRC	Female	1945	African descent	Not Hispanic or Latin American	2002	Stage I	19620	Deceased	1584	--
d65f7f50-2cb0-45e7-866a-ba5c498aef52	TCGA-CJ-4893	TCGA-KIRC	Female	1929	Caucasian	Not Hispanic or Latin American	--	Stage I	27885	Survived	--	750
f57690ba-a120-4ea2-83e0-0559d1eb62c4	TCGA-B0-5080	TCGA-KIRC	Male	1942	Caucasian	Not Hispanic or Latin American	2005	Stage IV	23052	Deceased	342	--
ed53edb2-3951-4d97-b62a-b9aee879cecd	TCGA-EV-5901	TCGA-KIRP	Female	1963	Caucasian	Not reported	--	Stage I	17275	Survived	--	1040
171044a9-9e8e-419b-af3a-4849d92c3b1e	TCGA-B0-5108	TCGA-KIRC	Male	1955	Caucasian	Not Hispanic or Latin American	--	Stage III	19932	Survived	--	1782
9fc40b03-0b56-4b1f-93ed-dbc455ae3fd9	TCGA-AL-3466	TCGA-KIRP	Male	1963	Caucasian	Not Hispanic or Latin American	2004	Stage IV	15181	Deceased	293	--
0709749f-a30a-4fdd-a409-d12be09a5899	TCGA-AK-3450	TCGA-KIRC	Female	1921	Caucasian	Not Hispanic or Latin American	--	Stage I	31364	Survived	--	1779
74fc9f65-b5f1-4b56-93a5-f90eaab52e31	TCGA-B0-5083	TCGA-KIRC	Male	1942	Caucasian	Not Hispanic or Latin American	2007	Stage I	23034	Deceased	1045	--
604b9fd9-93d4-40b8-b83b-f5381d8418a2	TCGA-GL-A9DD	TCGA-KIRP	Male	1944	Caucasian	Not Hispanic or Latin American	--	Stage I	25483	Survived	--	341
8aaa4e25-5c12-4ace-96dc-91aaa0c4457c	TCGA-B0-5094	TCGA-KIRC	Male	1946	Caucasian	Not Hispanic or Latin American	2008	Stage IV	22965	Deceased	333	--
8942ebfa-946a-41a7-8b4c-ce45a2096c81	TCGA-B0-4813	TCGA-KIRC	Male	1933	Caucasian	Not Hispanic or Latin American	2001	Stage III	25018	Deceased	18	18
cdd8eb5c-bda8-4961-9db4-72e0c4907e95	TCGA-BP-4973	TCGA-KIRC	Male	1959	Caucasian	Not reported	--	Stage III	17461	Survived	--	1384
2797088e-f534-4c1e-abf8-cc6f832cd911	TCGA-A4-7997	TCGA-KIRP	Male	1944	Caucasian	Not Hispanic or Latin American	--	Stage I	24486	Survived	--	927
9a404208-c3d3-4e6b-b511-1a4ccf595c18	TCGA-BP-4782	TCGA-KIRC	Female	1950	Caucasian	Not reported	--	Stage I	20102	Survived	--	354
2fc175d1-9d95-44fd-a53e-820f6f404551	TCGA-KN-8421	TCGA-KICH	Female	1957	Caucasian	Not Hispanic or Latin American	--	Stage II	17524	Survived	--	2674
2f1c4db6-88a7-4a5d-a5fe-94d85f569440	TCGA-KM-8443	TCGA-KICH	Male	1952	Caucasian	Not Hispanic or Latin American	--	Stage II	21183	Survived	--	1520
32bbf3d8-fd0e-45e2-b2a8-80192e86a13c	TCGA-UZ-A9Q0	TCGA-KIRP	Male	--	Caucasian	Not Hispanic or Latin American	--	Stage I	21915	Survived	--	3368
9dc7812b-c7a2-4de4-bf6d-4c7261384a62	TCGA-A3-3387	TCGA-KIRC	Male	1957	Caucasian	Not Hispanic or Latin American	--	Stage I	17920	Survived	--	617
b3a9b0be-2ccb-4e55-b72c-3f218ca46a3e	TCGA-BP-4962	TCGA-KIRC	Male	1947	Caucasian	Not reported	--	Stage II	21255	Survived	--	1785
7fc6b44d-ae66-409c-98e1-c1a518c33e95	TCGA-CZ-4864	TCGA-KIRC	Male	1916	Caucasian	Not Hispanic or Latin American	2009	Stage II	31557	Deceased	2830	2830
e865d40a-9989-436c-8426-88cc84c863e8	TCGA-CJ-5689	TCGA-KIRC	Male	1915	Caucasian	Hispanic or Latin American	2009	Stage I	32872	Deceased	1620	--
075d17f2-dd1a-4c12-9e6c-ded1b052d107	TCGA-P4-AAVO	TCGA-KIRP	Male	1939	Caucasian	Not Hispanic or Latin American	--	Stage I	25354	Survived	--	2400
8f8a632d-7fbd-4c86-b909-afb7edb9ad28	TCGA-B0-5701	TCGA-KIRC	Male	1942	Caucasian	Not Hispanic or Latin American	--	Stage III	23915	Survived	--	2461
7aece0e0-e57b-40b9-8ef3-8b98624b0e91	TCGA-B8-5546	TCGA-KIRC	Female	1972	African descent	Not Hispanic or Latin American	--	Stage I	14113	Survived	--	505
9bb2a95c-42f2-4847-8b65-eafa2d833859	TCGA-A4-A7UZ	TCGA-KIRP	Male	1942	Caucasian	Not Hispanic or Latin American	--	Stage III	26264	Survived	--	0
540cbfa7-d17d-44f5-b67e-f2b9b03827cd	TCGA-B8-A54F	TCGA-KIRC	Female	1963	African descent	Not Hispanic or Latin American	--	Stage I	18028	Survived	--	519
a6e960af-3ca5-42fb-b546-451c2583282d	TCGA-B9-4617	TCGA-KIRP	Male	1969	African descent	Not Hispanic or Latin American	--	Not reported	15053	Survived	--	35
baaf32ff-b31b-4c42-bbf6-8ff7ab569ab6	TCGA-KL-8335	TCGA-KICH	Male	1938	Caucasian	Not reported	--	Stage III	24832	Survived	--	2815
072507cf-1249-4b28-86d4-3ab97822a74c	TCGA-B1-A47M	TCGA-KIRP	Male	1932	African descent	Not Hispanic or Latin American	--	Stage III	29068	Survived	--	659
e58f2c7b-d1cc-48f3-a0c9-dcd2b27c37f6	TCGA-B8-5552	TCGA-KIRC	Female	1969	Caucasian	Not Hispanic or Latin American	--	Stage I	15219	Survived	--	1046
310c31bf-91ce-40b4-99e4-a10242296de9	TCGA-CJ-5676	TCGA-KIRC	Male	1957	Caucasian	Hispanic or Latin American	--	Stage III	17170	Survived	--	4067
44f39f41-cf63-421d-ad56-513beb72d9ca	TCGA-G7-A8LE	TCGA-KIRP	Male	1946	Caucasian	Not Hispanic or Latin American	--	Stage I	22810	Survived	--	2453
87c5e2cb-0b2e-4f40-927b-5e1ad7de4824	TCGA-P4-A5E6	TCGA-KIRP	Male	1937	African descent	Not Hispanic or Latin American	--	Stage III	24615	Survived	--	3035
09c4ea05-928d-49b7-b7fb-30cff3481b14	TCGA-CW-5584	TCGA-KIRC	Male	1929	Caucasian	Not Hispanic or Latin American	2003	Stage III	27352	Deceased	164	--
69cec2e1-fa83-47e2-a75d-9c1432f1108d	TCGA-G7-A8LC	TCGA-KIRP	Male	1952	Caucasian	Not Hispanic or Latin American	--	Stage I	22553	Survived	--	702
4d02010e-9e69-40d3-9bf0-3d4510aa0614	TCGA-AL-3467	TCGA-KIRP	Female	1951	Caucasian	Not Hispanic or Latin American	--	Not reported	19783	Survived	--	2135
e15a108e-0b32-426f-926a-3fb1af0a82d3	TCGA-B3-4104	TCGA-KIRP	Male	1935	Caucasian	Not Hispanic or Latin American	--	Stage II	27709	Survived	--	1049
2b7c7e88-a204-44a4-ab28-624b586dc238	TCGA-A4-A5Y0	TCGA-KIRP	Female	1951	Caucasian	Not Hispanic or Latin American	--	Stage I	22341	Survived	--	252
a2663a86-a006-4867-9e88-2b523df48303	TCGA-B8-A54K	TCGA-KIRC	Male	1951	African descent	Not Hispanic or Latin American	--	Stage I	22627	Survived	--	469
f00b7956-73a9-4e4b-85d2-60b3ba13f4a4	TCGA-CZ-5457	TCGA-KIRC	Male	1944	Caucasian	Not Hispanic or Latin American	--	Stage III	22763	Survived	--	2754
2efcefca-5e52-4b3d-a48a-9e9c73cc0141	TCGA-CZ-4854	TCGA-KIRC	Male	1937	Caucasian	Not Hispanic or Latin American	2008	Stage I	24876	Deceased	1404	--
307b742a-3340-41ae-8e41-934b58bbd48d	TCGA-AT-A5NU	TCGA-KIRP	Male	1934	Caucasian	Hispanic or Latin American	--	Stage I	28137	Survived	--	67
291f45ab-1b77-456a-9783-06106fbe3053	TCGA-CZ-4866	TCGA-KIRC	Female	1927	Caucasian	Not Hispanic or Latin American	--	Stage I	28878	Survived	--	3267
8d5d69a4-7733-4dec-8ddb-64c79c2c956e	TCGA-BP-4768	TCGA-KIRC	Female	1933	Caucasian	Not reported	--	Stage I	26474	Survived	--	400
1380d4cc-8f56-4206-bfe6-8e99462fe180	TCGA-B0-4823	TCGA-KIRC	Male	1914	Caucasian	Not Hispanic or Latin American	2003	Stage I	32290	Deceased	454	--
4cfe4f31-f62c-423a-8b9f-17f455b15313	TCGA-BP-4760	TCGA-KIRC	Male	1935	African descent	Not Hispanic or Latin American	--	Stage I	25268	Survived	--	2361
d34c99b6-d90d-4328-86f8-e0152365e1ab	TCGA-IA-A83V	TCGA-KIRP	Male	1939	Caucasian	Not Hispanic or Latin American	2010	Stage I	23238	Deceased	2941	--
78048432-2de1-498c-9cf1-9c5bd43daa39	TCGA-CJ-4870	TCGA-KIRC	Female	1946	African descent	Not Hispanic or Latin American	--	Stage III	21340	Survived	--	1498
a46f36c3-e886-4efe-945a-0cb2e5b765ef	TCGA-B0-4822	TCGA-KIRC	Male	1924	Caucasian	Not Hispanic or Latin American	2005	Stage II	28774	Deceased	1111	--
b7994839-77a5-4725-aa58-a9e8c79dbfc2	TCGA-CJ-4895	TCGA-KIRC	Male	1943	Caucasian	Not Hispanic or Latin American	2008	Stage IV	22892	Deceased	1200	--
1b0ad45e-b917-4e91-83c4-e5386cdf0eee	TCGA-B0-4842	TCGA-KIRC	Female	1931	Caucasian	Not Hispanic or Latin American	2008	Stage III	27019	Deceased	1724	--
56ae2434-e84a-494b-a784-2c2009be8ae6	TCGA-B9-5155	TCGA-KIRP	Male	1939	Caucasian	Not Hispanic or Latin American	--	Stage III	26149	Survived	--	665
99f59583-2728-4c1d-b98c-8fbc3bb0a819	TCGA-CZ-5470	TCGA-KIRC	Female	1936	Not reported	Not reported	--	Stage II	26494	Survived	--	386
eee108d6-bb11-4369-b776-0f524afef6f3	TCGA-CJ-5672	TCGA-KIRC	Male	1920	Caucasian	Not Hispanic or Latin American	2010	Stage I	30900	Deceased	2190	--
798d51ff-182e-406c-8885-8a198d9959d1	TCGA-A3-3378	TCGA-KIRC	Male	1946	Caucasian	Not Hispanic or Latin American	--	Stage I	22090	Survived	--	630
616bc43c-34b9-48e8-8219-4ef4d052f91b	TCGA-B0-5095	TCGA-KIRC	Male	1927	Caucasian	Not Hispanic or Latin American	2008	Stage III	29921	Deceased	245	--
08c1bb22-81f5-4a6d-98ce-f9c31d896eab	TCGA-AK-3461	TCGA-KIRC	Male	1935	Caucasian	Not Hispanic or Latin American	--	Stage I	26464	Survived	--	2217
f94fc471-74f8-4774-9f28-95533293fc1d	TCGA-5P-A9K9	TCGA-KIRP	Female	1952	Caucasian	Not Hispanic or Latin American	2012	Not reported	21600	Deceased	589	--
8958c2bf-b986-4c07-98d2-09dfe2375a14	TCGA-BP-4345	TCGA-KIRC	Male	1944	Caucasian	Not Hispanic or Latin American	--	Stage III	22879	Survived	--	1516
cfc999aa-802e-4a0d-8b14-be2b19fa2a17	TCGA-B2-4101	TCGA-KIRC	Male	1958	Caucasian	Not Hispanic or Latin American	--	Stage II	19059	Survived	--	648
04beccb3-f513-4d60-b57f-a4382e4eeda3	TCGA-B8-A8YJ	TCGA-KIRC	Female	1953	African descent	Not reported	--	Stage I	21994	Survived	--	431
11a33d4a-4839-468f-9d61-5630586ed978	TCGA-KO-8404	TCGA-KICH	Male	1927	Caucasian	Not Hispanic or Latin American	2005	Stage IV	28705	Deceased	325	--
f0446aed-9b4b-4e77-8708-88f239f2b671	TCGA-B9-A5W7	TCGA-KIRP	Male	1965	African descent	Not Hispanic or Latin American	--	Stage I	17465	Survived	--	585
a42103aa-0f25-4939-9f9d-9ec11a5c8cca	TCGA-A3-A8OW	TCGA-KIRC	Male	1974	African descent	Not Hispanic or Latin American	--	Stage III	13546	Survived	--	323
e3aa5595-223b-42e9-aec0-e49f631e37d5	TCGA-AS-3777	TCGA-KIRC	Male	1946	Caucasian	Not Hispanic or Latin American	--	Stage I	23039	Survived	--	1238
672fe335-42ed-4a86-9953-c8862a081c24	TCGA-BQ-7050	TCGA-KIRP	Female	1953	Caucasian	Hispanic or Latin American	--	Stage I	19550	Survived	--	1864
4afab224-f65e-48a8-8802-01138e210e29	TCGA-G7-7501	TCGA-KIRP	Female	1956	African descent	Not Hispanic or Latin American	--	Stage III	20165	Deceased	624	416
f0f7e57f-1e9d-4f24-a685-a0811aacbbed	TCGA-MH-A55Z	TCGA-KIRP	Male	1946	African descent	Not Hispanic or Latin American	--	Stage I	24017	Survived	--	845
a7bf785f-0539-4899-ac21-47d1fc347ee8	TCGA-AL-3473	TCGA-KIRP	Male	1953	Caucasian	Not Hispanic or Latin American	--	Stage II	20104	Survived	--	1906
5e248b21-e69d-4dee-a1e8-029ade80d0eb	TCGA-CZ-5465	TCGA-KIRC	Female	1931	Not reported	Not reported	--	Stage III	27838	Deceased	2564	1446
3cbca837-f5a7-4a87-8f02-c59eac232d5a	TCGA-A3-3308	TCGA-KIRC	Female	1929	Caucasian	Not reported	--	Stage III	28287	Survived	--	16
beef6a78-a57c-46f1-8f4e-6899f0ba2c6d	TCGA-CJ-6032	TCGA-KIRC	Female	1941	Caucasian	Hispanic or Latin American	--	Stage II	23310	Survived	--	3639
a007b49b-297c-48c7-9f0a-12bdb470df4b	TCGA-IZ-8195	TCGA-KIRP	Male	1930	Caucasian	Not Hispanic or Latin American	--	Stage II	29963	Survived	--	677
94625198-6b3b-4cf2-bb22-4d247e498d28	TCGA-A4-8098	TCGA-KIRP	Male	1938	African descent	Not Hispanic or Latin American	--	Stage I	26685	Survived	--	896
0b8956ec-f11b-4d74-b8b7-bfcb64ae974c	TCGA-A4-7585	TCGA-KIRP	Male	1940	Caucasian	Not Hispanic or Latin American	2009	Stage III	24778	Deceased	1070	--
f7a2b87f-c265-4cc5-a792-428756e31d8b	TCGA-A4-7287	TCGA-KIRP	Female	1936	Caucasian	Not Hispanic or Latin American	--	Stage I	27621	Deceased	597	234
27fb01ac-3ea8-4dd5-8479-d89cdef1a118	TCGA-EV-5903	TCGA-KIRP	Male	1953	Caucasian	Not Hispanic or Latin American	--	Stage I	20888	Survived	--	757
804a6159-e381-44ea-8680-43c69d013cef	TCGA-CJ-4874	TCGA-KIRC	Female	1931	Caucasian	Hispanic or Latin American	--	Stage I	26761	Survived	--	2283
23656226-2d99-4548-959f-5c2eed803e33	TCGA-KM-8438	TCGA-KICH	Female	1955	Caucasian	Not Hispanic or Latin American	--	Stage II	16683	Survived	--	4622
d542c363-fd6c-447d-b71a-0e94fec125e4	TCGA-KL-8329	TCGA-KICH	Female	1946	Asian	Not reported	--	Stage I	20972	Survived	--	2752
fedcaa7b-ec9d-4bae-a8ac-af10fbf3e568	TCGA-B0-5119	TCGA-KIRC	Female	1949	Caucasian	Not Hispanic or Latin American	--	Stage I	22607	Survived	--	1552
87ae9d51-7397-4dca-87a4-7b0f20321729	TCGA-P4-A5E8	TCGA-KIRP	Male	1947	Caucasian	Not Hispanic or Latin American	2007	Stage III	21132	Deceased	1306	--
18545977-f8a7-42a8-a15c-7a1fe72bd77f	TCGA-BQ-5876	TCGA-KIRP	Male	1929	Caucasian	Not reported	--	Stage I	27409	Survived	--	586
222a2e5b-9d55-4477-8a54-7776bd44f8a7	TCGA-KN-8423	TCGA-KICH	Male	1961	Caucasian	Not Hispanic or Latin American	--	Stage I	16335	Survived	--	788
420409bb-0889-40a1-80cf-9b5916704f04	TCGA-B0-4814	TCGA-KIRC	Male	1943	Caucasian	Not Hispanic or Latin American	2001	Stage IV	21374	Deceased	168	--
960d1eaf-0b96-488b-b62c-829c024fd4b8	TCGA-CJ-5671	TCGA-KIRC	Male	1953	Caucasian	Not Hispanic or Latin American	--	Stage I	18954	Survived	--	3987
52e9daf0-288b-4220-bd44-0b6147fd951c	TCGA-AK-3456	TCGA-KIRC	Male	1959	African descent	Not Hispanic or Latin American	--	Stage II	17821	Survived	--	1143
25e4b9ff-2bdb-4ee1-8d6d-17cce7949db9	TCGA-GL-A59T	TCGA-KIRP	Male	1966	Caucasian	Not Hispanic or Latin American	--	Stage I	17142	Survived	--	546
36e36797-1059-4198-ac91-45b3fa50f683	TCGA-BQ-5881	TCGA-KIRP	Male	1937	Caucasian	Not Hispanic or Latin American	--	Stage I	25481	Survived	--	1454
03f3dd32-e1d1-485b-a968-3f55798f4d46	TCGA-KL-8326	TCGA-KICH	Male	1932	Caucasian	Not reported	--	Stage III	25267	Survived	--	3322
3f72d63f-ad48-4500-baf6-897b1d6dda7d	TCGA-B0-4712	TCGA-KIRC	Male	1930	Caucasian	Not Hispanic or Latin American	2009	Stage IV	28095	Deceased	1337	--
3129e869-bb2f-423a-bd20-d0daae33b11a	TCGA-KL-8340	TCGA-KICH	Male	1972	Caucasian	Not reported	--	Stage II	12696	Survived	--	2024
86f68b7d-30f9-4f01-a9ea-5db1fcd00453	TCGA-CZ-4853	TCGA-KIRC	Male	1923	Caucasian	Not reported	--	Stage I	30191	Survived	--	774
46c87ae0-c123-4bdc-8a79-d375d8a7e7a3	TCGA-A3-3383	TCGA-KIRC	Male	1954	Caucasian	Not reported	--	Stage I	19324	Survived	--	861
a7ddd737-714d-423f-8fb5-5a932d014487	TCGA-CZ-5460	TCGA-KIRC	Male	1951	Caucasian	Not Hispanic or Latin American	--	Stage IV	20392	Survived	--	2873
cc316faf-dcb1-4dea-b8b0-a17d000ff40f	TCGA-KN-8425	TCGA-KICH	Male	1952	Caucasian	Not reported	--	Stage I	19692	Survived	--	3179
12fb96fd-c75e-4eb9-ad92-1a1ae7ad4749	TCGA-BQ-7044	TCGA-KIRP	Male	1927	Caucasian	Not reported	--	Stage III	26831	Survived	--	3760
72cc3423-d214-4035-b934-0d4e4b806b6c	TCGA-5P-A9K2	TCGA-KIRP	Male	1945	Caucasian	Not Hispanic or Latin American	--	Not reported	22964	Survived	--	2392
fb3aced2-4eb5-4b82-824f-e382a469bc15	TCGA-O9-A75Z	TCGA-KIRP	Male	1969	Caucasian	Not Hispanic or Latin American	--	Stage I	16183	Survived	--	471
d4d1c1d8-efc3-4282-b986-d7343de7e78f	TCGA-DW-7842	TCGA-KIRP	Male	1959	Caucasian	Not Hispanic or Latin American	--	Stage I	19166	Survived	--	92
781acafa-a58b-4180-bbca-c5b675d51b17	TCGA-BP-5168	TCGA-KIRC	Male	1927	Caucasian	Not reported	2006	Stage I	27692	Deceased	1463	--
88fc4bc4-32cf-4d92-8c29-20d920b8f719	TCGA-CW-5580	TCGA-KIRC	Female	1930	Caucasian	Not Hispanic or Latin American	2008	Stage IV	26696	Deceased	1964	--
e0c97b37-9834-4811-981e-dcb8982dba44	TCGA-UZ-A9PL	TCGA-KIRP	Male	--	Caucasian	Not Hispanic or Latin American	--	Stage II	21550	Survived	--	3152
19cd6d5b-0de3-4afd-9ecf-6f80c9977dc0	TCGA-BP-4967	TCGA-KIRC	Male	1929	Caucasian	Not reported	--	Stage III	27857	Survived	--	205
9ecdde9c-2179-4830-bd10-c4fa40f26066	TCGA-BP-4756	TCGA-KIRC	Female	1941	Asian	Not reported	--	Stage I	23001	Survived	--	374
dc6f2273-ffea-41f4-a28b-d03112587f4f	TCGA-BP-4769	TCGA-KIRC	Male	1942	Caucasian	Not Hispanic or Latin American	--	Stage I	23190	Survived	--	1876
b809c2f2-185c-496a-a1d4-589294443a1d	TCGA-B9-A44B	TCGA-KIRP	Male	1942	African descent	Not Hispanic or Latin American	--	Stage III	25763	Survived	--	361
61c75ffb-9d5d-478e-af48-1808e700aceb	TCGA-CJ-4640	TCGA-KIRC	Male	1955	Caucasian	Hispanic or Latin American	--	Stage III	18178	Survived	--	3480
52db2d93-fcc6-4f80-9668-a0a6ea450738	TCGA-A3-A6NL	TCGA-KIRC	Female	1963	African descent	Not Hispanic or Latin American	--	Stage I	17952	Survived	--	689
52495119-a052-4749-bed4-d4c81a6c3fb2	TCGA-BQ-5888	TCGA-KIRP	Female	1935	Caucasian	Not reported	--	Stage I	27346	Survived	--	403
7ca06dbe-f073-4aee-86ff-a545fad5ea93	TCGA-CJ-4878	TCGA-KIRC	Female	1933	Caucasian	Hispanic or Latin American	--	Stage III	26224	Survived	--	2186
28c8c2c6-c7bd-4a35-baaf-54133c2ba3ee	TCGA-EU-5907	TCGA-KIRC	Male	1929	Caucasian	Not Hispanic or Latin American	--	Stage III	29863	Survived	--	127
b472c982-f024-4e09-8326-071ee35ea55c	TCGA-BP-5008	TCGA-KIRC	Male	1961	Caucasian	Not reported	--	Stage I	17008	Survived	--	1071
635fedd0-4daf-4d97-958a-3e0f49c1a708	TCGA-BQ-5889	TCGA-KIRP	Male	1946	Caucasian	Not Hispanic or Latin American	2009	Stage IV	23267	Deceased	329	--
46240f32-116b-470c-9846-3616a6db4f2e	TCGA-A3-3376	TCGA-KIRC	Male	1955	African descent	Not Hispanic or Latin American	--	Stage I	18954	Deceased	1696	1070
a22d5ba2-5f11-49e9-911a-ec03b785fae5	TCGA-B8-4153	TCGA-KIRC	Male	1936	Caucasian	Not Hispanic or Latin American	--	Stage III	27031	Survived	--	762
cfc6f9ef-73b1-46af-b4c8-94fdd34f4584	TCGA-BQ-5894	TCGA-KIRP	Male	1968	Not reported	Hispanic or Latin American	--	Stage IV	15510	Survived	--	84
851a1157-e460-4794-8534-2eb6f0ae7468	TCGA-2Z-A9J1	TCGA-KIRP	Male	1937	Caucasian	Not Hispanic or Latin American	--	Stage I	26244	Survived	--	2298
3372a7d2-79cb-4cf0-9a7e-fe1a6b205daa	TCGA-A3-3347	TCGA-KIRC	Female	1929	Caucasian	Not Hispanic or Latin American	--	Stage III	27966	Deceased	1610	1610
3c4ed50e-d00e-4ffe-b426-41dfdcb7327a	TCGA-BP-4166	TCGA-KIRC	Male	1934	Caucasian	Not reported	--	Stage III	25300	Survived	--	13
7b184674-c88e-4479-be18-b403af5cc2c5	TCGA-BP-4766	TCGA-KIRC	Female	1961	Caucasian	Not reported	--	Stage I	15799	Survived	--	1462
40f79cfe-a51f-497b-b06e-7a4f9004f092	TCGA-KM-8442	TCGA-KICH	Male	1971	Not reported	Hispanic or Latin American	--	Stage II	14212	Survived	--	1437
28011111-4a01-4cdc-8d6b-7223fb2c501b	TCGA-G6-A8L6	TCGA-KIRC	Male	1958	African descent	Not Hispanic or Latin American	--	Stage IV	20306	Deceased	313	305
3eafd07f-49f4-4e16-a4f5-8c43ff40fb90	TCGA-B1-7332	TCGA-KIRP	Female	1951	African descent	Not Hispanic or Latin American	--	Stage II	22277	Survived	--	1141
4c474c70-1d72-49e8-a8cc-a4145c5ab607	TCGA-CZ-5985	TCGA-KIRC	Male	1948	Caucasian	Not Hispanic or Latin American	--	Stage II	21242	Survived	--	1997
ae8bc8ea-29e6-4fe4-9095-d6d2655ee4f5	TCGA-BQ-7048	TCGA-KIRP	Male	1939	Caucasian	Not Hispanic or Latin American	--	Stage III	23460	Survived	--	2839
1d176c53-6cbb-4a39-9a6f-669b4f1cb575	TCGA-B0-5696	TCGA-KIRC	Male	1938	Caucasian	Hispanic or Latin American	--	Stage III	25552	Survived	--	2609
51ae5536-f55c-4fd6-b990-5d3add98de5c	TCGA-P4-AAVM	TCGA-KIRP	Male	1941	Caucasian	Hispanic or Latin American	--	Stage I	25280	Survived	--	1539
33cd8b05-2b9b-40dd-97a2-40d02e27ee90	TCGA-CJ-4900	TCGA-KIRC	Female	1937	Caucasian	Not Hispanic or Latin American	2010	Stage IV	25508	Deceased	1714	--
96c38b74-c22b-4001-bfd0-a37eda1fbaed	TCGA-A3-A6NJ	TCGA-KIRC	Female	1955	African descent	Not Hispanic or Latin American	--	Stage I	20918	Survived	--	468
d5213422-9447-4f62-b486-3303e3f991fa	TCGA-CZ-4857	TCGA-KIRC	Male	1949	Caucasian	Not Hispanic or Latin American	2008	Stage IV	20718	Deceased	1432	--
09d7ce7a-774e-4784-9c9a-32b766fdb173	TCGA-B8-A54J	TCGA-KIRC	Male	1952	African descent	Not Hispanic or Latin American	--	Stage II	22071	Survived	--	528
6949efc1-4f71-4141-b129-a54b4bde5d2f	TCGA-CZ-4860	TCGA-KIRC	Male	1945	Caucasian	Not reported	2005	Stage IV	22115	Deceased	206	--
5ee039ec-3414-4fb8-8299-0c8c5198a1eb	TCGA-2Z-A9JO	TCGA-KIRP	Female	1956	African descent	Not Hispanic or Latin American	--	Stage I	20466	Survived	--	949
a614255d-9f1b-4e9a-8a50-435d4d123b3f	TCGA-BQ-7051	TCGA-KIRP	Male	1933	Caucasian	Not reported	--	Stage II	27120	Survived	--	1533
d61e22d8-c3ce-4237-83d7-da188b9fd456	TCGA-HE-A5NI	TCGA-KIRP	Male	--	Not reported	Not reported	--	Stage I	26985	Survived	--	360
bcbab8ce-abf1-4029-9419-6b1c671d41df	TCGA-B0-4699	TCGA-KIRC	Male	1930	Caucasian	Not Hispanic or Latin American	2004	Stage IV	27225	Deceased	110	--
d0f908c5-aafd-4b76-a2fb-39b7cc19bcf7	TCGA-B4-5377	TCGA-KIRC	Female	1942	Caucasian	Not Hispanic or Latin American	--	Stage IV	25115	Survived	--	365
0f3c4f8f-0766-46b0-81b4-18ca4f6ea20a	TCGA-KL-8330	TCGA-KICH	Female	1959	African descent	Not Hispanic or Latin American	--	Stage II	16250	Survived	--	3304
3b2b492b-94af-4540-b283-3b9ef98d5b2f	TCGA-B0-5706	TCGA-KIRC	Male	1959	Caucasian	Not Hispanic or Latin American	--	Stage II	16442	Survived	--	3205
ce0f2e87-6c46-45b5-8df7-3ba32e48ce52	TCGA-2Z-A9JG	TCGA-KIRP	Male	1946	Caucasian	Not Hispanic or Latin American	--	Stage I	23458	Survived	--	1662
c5bf474c-6919-47b4-ba59-34ab20c087d5	TCGA-B0-5120	TCGA-KIRC	Female	1938	Caucasian	Not Hispanic or Latin American	--	Stage I	26559	Survived	--	1169
d8b88441-16c7-4201-9c01-3e7237d18eee	TCGA-2Z-A9JK	TCGA-KIRP	Male	1961	Caucasian	Not Hispanic or Latin American	--	Stage III	18540	Survived	--	1186
f217a4f9-d8d8-440e-b73a-5f0448b58c4f	TCGA-BP-5187	TCGA-KIRC	Male	1953	Caucasian	Not reported	--	Stage I	19999	Survived	--	406
4e4faf51-2cbf-4910-a093-186660e4a19b	TCGA-KM-8476	TCGA-KICH	Male	1955	Caucasian	Not Hispanic or Latin American	--	Stage I	17240	Survived	--	3745
0bbfeec1-fbae-4c92-ae90-60ba39303bd8	TCGA-A3-3349	TCGA-KIRC	Female	1972	Caucasian	Not Hispanic or Latin American	--	Stage I	12431	Survived	--	1385
9816ac2a-0412-4649-a9da-8fd91b1eb8e1	TCGA-BP-4789	TCGA-KIRC	Male	1959	Caucasian	Not reported	--	Stage I	17540	Survived	--	1489
ed013726-31cd-4201-bf95-7746cce2a525	TCGA-A4-8515	TCGA-KIRP	Male	1965	american indian or alaska native	Not Hispanic or Latin American	--	Stage I	17345	Survived	--	709
f0c2cc3e-afdc-41b0-a892-3c0c00da5bc7	TCGA-SX-A7SP	TCGA-KIRP	Female	1946	Caucasian	Not Hispanic or Latin American	2013	Stage I	24382	Deceased	496	--
80c4fc5b-dc7d-4308-8c81-6e83625963b5	TCGA-BP-4781	TCGA-KIRC	Male	1927	Caucasian	Not reported	--	Stage I	28701	Survived	--	2080
aa82fb26-96c3-4b3d-a2e9-7123c0a07321	TCGA-B4-5843	TCGA-KIRC	Male	1965	Caucasian	Not Hispanic or Latin American	--	Stage I	16779	Survived	--	11
fb322d32-d753-41cc-a21e-e47bf063d5bb	TCGA-KO-8415	TCGA-KICH	Female	1963	Caucasian	Hispanic or Latin American	--	Stage I	16395	Survived	--	2939
0697436f-e487-45db-b0bc-ad9246f70196	TCGA-KL-8324	TCGA-KICH	Female	1933	Caucasian	Not reported	--	Stage II	24650	Survived	--	4676
9e4c8e1e-041c-4c95-9801-70c8dd0a7797	TCGA-B9-A8YI	TCGA-KIRP	Male	1934	African descent	Not Hispanic or Latin American	--	Stage I	28917	Survived	--	374
6e9e5e05-2bf8-4724-8e31-241f517289de	TCGA-BP-5178	TCGA-KIRC	Male	1933	Caucasian	Not reported	2009	Stage IV	26070	Deceased	1912	--
87ecfd2a-3376-446b-9b60-2cb8541bab9a	TCGA-A4-8310	TCGA-KIRP	Male	1954	Caucasian	Not Hispanic or Latin American	--	Stage III	21312	Survived	--	780
9f5c0a43-d222-484a-9249-d288387dd7a1	TCGA-BP-5010	TCGA-KIRC	Male	1944	Caucasian	Not Hispanic or Latin American	2009	Stage III	23130	Deceased	878	--
44e3fa7e-9a5f-438b-9c87-daa559e28d8d	TCGA-A4-7828	TCGA-KIRP	Female	1937	African descent	Not Hispanic or Latin American	--	Stage I	27122	Survived	--	238
bb4a6123-5851-4e49-b859-606ffd2a4d11	TCGA-B0-5710	TCGA-KIRC	Male	1951	Caucasian	Not Hispanic or Latin American	--	Stage I	21168	Survived	--	2430
4fd166d4-0b77-4815-ae6a-2165522f8251	TCGA-CJ-4884	TCGA-KIRC	Female	1933	Caucasian	Not Hispanic or Latin American	--	Stage III	26475	Survived	--	1759
88c91a7b-5c41-4361-85d0-da759ab94204	TCGA-B0-5711	TCGA-KIRC	Male	1954	Caucasian	Not Hispanic or Latin American	--	Stage III	18444	Survived	--	3989
2309c424-26fa-4cc6-a22a-2dc0f989af59	TCGA-CJ-4868	TCGA-KIRC	Male	1963	Caucasian	Not Hispanic or Latin American	2006	Stage IV	15601	Deceased	646	646
53d40ba3-c33b-4139-967d-5110884237a3	TCGA-BQ-5877	TCGA-KIRP	Male	1944	African descent	Not reported	2004	Stage IV	22095	Deceased	270	--
ab5266f6-8015-4347-b0bd-131ab1fbad51	TCGA-B4-5844	TCGA-KIRC	Female	1949	Caucasian	Not Hispanic or Latin American	--	Stage II	22409	Survived	--	7
f89990c0-e6a1-4721-86e6-2b06c33e0588	TCGA-2Z-A9JS	TCGA-KIRP	Male	1938	Caucasian	Not Hispanic or Latin American	2013	Stage I	27053	Deceased	492	--
d6625c4d-cd1c-4c62-8100-e8b2a49ce3ad	TCGA-BP-4974	TCGA-KIRC	Male	1948	Caucasian	Not reported	2006	Stage IV	21310	Deceased	211	--
d30f460b-8e85-4eb4-83b8-0a5d8bf4d10d	TCGA-BP-5199	TCGA-KIRC	Male	1948	Caucasian	Not Hispanic or Latin American	--	Stage II	21256	Survived	--	1355
3abd0691-f575-44ce-a13e-8f6bceb8cabf	TCGA-2Z-A9JI	TCGA-KIRP	Male	1972	Caucasian	Not Hispanic or Latin American	--	Stage III	14196	Survived	--	1567
6dc3788e-570f-4f39-9951-dcc7ad51e1f2	TCGA-BP-4765	TCGA-KIRC	Male	1961	Caucasian	Not reported	--	Stage I	15814	Survived	--	2184
af1111af-9384-4e37-9b16-227d38007ebd	TCGA-KN-8432	TCGA-KICH	Female	1924	Caucasian	Not Hispanic or Latin American	--	Stage II	31591	Survived	--	76
08a96dec-e658-493a-9308-83f7ace3b3b6	TCGA-KO-8409	TCGA-KICH	Male	1935	Caucasian	Not Hispanic or Latin American	--	Stage II	25419	Survived	--	3180
beac52b4-ab6b-4f20-aeff-8c15990aa710	TCGA-B9-7268	TCGA-KIRP	Male	1952	Caucasian	Not Hispanic or Latin American	--	Stage II	21705	Survived	--	671
8a575e00-5dc5-416d-a8f5-2cdfb8e62c31	TCGA-A3-3358	TCGA-KIRC	Female	1948	Caucasian	Not Hispanic or Latin American	--	Stage I	21087	Survived	--	1307
739deed4-d1dc-458f-bd0f-1e24d2bfd305	TCGA-KM-8439	TCGA-KICH	Male	1981	Caucasian	Not Hispanic or Latin American	--	Stage I	11266	Survived	--	708
70e306ee-9584-49d6-81a1-a49d837ab6aa	TCGA-KL-8341	TCGA-KICH	Male	1965	Asian	Not reported	2008	Stage IV	15045	Deceased	754	--
dc4b12b4-9b0d-4015-8e97-9f8756e24485	TCGA-HE-7128	TCGA-KIRP	Male	--	Not reported	Not reported	--	Stage I	--	Survived	--	--
03905b58-4b13-410c-8e92-115ab2a42e80	TCGA-B0-4824	TCGA-KIRC	Female	1953	Caucasian	Not Hispanic or Latin American	2006	Stage I	18132	Deceased	1657	--
cdfa3c5d-2fe8-4dfd-92c2-a54f39f55f18	TCGA-CJ-4641	TCGA-KIRC	Female	1950	Caucasian	Not Hispanic or Latin American	2009	Stage IV	20410	Deceased	1661	--
f9306cb1-c4e4-42eb-8aa9-ee906c408e10	TCGA-HE-A5NK	TCGA-KIRP	Male	--	Not reported	Not reported	--	Not reported	30088	Survived	--	2228
847865ca-9cf4-414b-bf59-a55965f37ec6	TCGA-J7-8537	TCGA-KIRP	Female	1974	Asian	Not Hispanic or Latin American	--	Stage III	13628	Deceased	321	4
36182304-2db7-446a-929c-7e43a47d863a	TCGA-BQ-7056	TCGA-KIRP	Female	1933	Caucasian	Not Hispanic or Latin American	--	Stage III	27467	Survived	--	612
5003a0cb-1a60-4c2e-b7f7-6e9245c66968	TCGA-BP-4959	TCGA-KIRC	Male	1954	Caucasian	Not Hispanic or Latin American	--	Stage I	17968	Survived	--	2660
828ad452-3daf-4467-bcbc-6dac2c93a7db	TCGA-B8-5553	TCGA-KIRC	Female	1943	Caucasian	Not Hispanic or Latin American	--	Stage I	24729	Survived	--	435
c33d0d12-a744-4a9a-b3f7-e28da6a109ab	TCGA-A3-A8OX	TCGA-KIRC	Female	1947	African descent	Not Hispanic or Latin American	--	Stage I	23998	Survived	--	0
ed97aeee-2a5b-4361-ab4f-f53c3fc5f532	TCGA-BP-4335	TCGA-KIRC	Female	1938	Caucasian	Not reported	2004	Stage IV	23860	Deceased	475	--
bbbce1ba-c739-43ba-b9cf-a4f746491ae3	TCGA-B2-4102	TCGA-KIRC	Male	1949	Caucasian	Not Hispanic or Latin American	--	Stage I	22492	Survived	--	952
4dd51edf-05d1-445a-b43c-6fce29eb21d4	TCGA-CW-6090	TCGA-KIRC	Male	1935	Caucasian	Not reported	--	Stage I	24909	Survived	--	2552
2666ab3e-f2b9-4b3d-bfce-aac2a4bafe62	TCGA-B3-3926	TCGA-KIRP	Female	1951	Caucasian	Not Hispanic or Latin American	--	Stage I	21876	Survived	--	883
16559faa-8103-4973-a47d-3435443e8ec1	TCGA-DV-5568	TCGA-KIRC	Male	1983	Caucasian	Not Hispanic or Latin American	--	Stage I	9714	Survived	--	370
91a605b2-929a-44ce-8522-2ff793ddf82f	TCGA-BQ-5882	TCGA-KIRP	Male	1953	Not reported	Not reported	2008	Stage III	20042	Deceased	658	--
c0ce18e0-89bd-469d-8ca7-292f815cd34f	TCGA-J7-A8I2	TCGA-KIRP	Male	1938	Asian	Not Hispanic or Latin American	--	Stage I	27431	Survived	--	307
8fc6b46b-1c60-40b1-8924-0c2c9307c6e0	TCGA-G7-6793	TCGA-KIRP	Female	1947	Caucasian	Not Hispanic or Latin American	2007	Stage IV	22215	Deceased	336	--
4e244c64-8fb6-4689-a306-3d5ed5c6cca5	TCGA-G7-6796	TCGA-KIRP	Male	1950	Caucasian	Not Hispanic or Latin American	--	Stage I	21252	Survived	--	2173
577847b9-f9b6-4954-868f-3d5ab2b4f694	TCGA-CZ-5453	TCGA-KIRC	Male	1939	Caucasian	Not reported	--	Stage II	24640	Deceased	2419	25
db7d3240-9fbd-432e-83ee-7226a6dcb9ce	TCGA-DW-7841	TCGA-KIRP	Male	1949	African descent	Not Hispanic or Latin American	--	Stage I	22403	Survived	--	445
1b3f2411-52cd-4482-bea2-95cf72020c6f	TCGA-AK-3425	TCGA-KIRC	Male	1932	Caucasian	Not Hispanic or Latin American	--	Stage I	24912	Survived	--	3343
3e5385f5-d4ff-4b96-8259-312602ec1196	TCGA-SX-A7SU	TCGA-KIRP	Male	1963	Not reported	Hispanic or Latin American	--	Stage I	17349	Survived	--	1331
158549f3-8f26-4efa-b3fd-62da0665830c	TCGA-B9-A8YH	TCGA-KIRP	Male	1961	African descent	Not Hispanic or Latin American	--	Stage I	19051	Survived	--	532
01277e9d-a35f-45d9-9e60-2e8cd79630a0	TCGA-DV-A4W0	TCGA-KIRC	Male	1953	African descent	Not Hispanic or Latin American	--	Stage I	20101	Survived	--	2470
c0a632ca-3e72-4553-8670-4a83c3a81b42	TCGA-WN-AB4C	TCGA-KIRP	Female	1951	Caucasian	Not Hispanic or Latin American	--	Stage I	--	Survived	--	1188
d9405dd0-ab00-4aac-9ba3-1e2bc43305da	TCGA-KV-A6GE	TCGA-KIRP	Male	1946	Caucasian	Not Hispanic or Latin American	--	Stage I	23979	Survived	--	885
edcbbfd8-9fc9-4774-bfbd-d1a30dc2f46a	TCGA-KN-8436	TCGA-KICH	Male	1947	Caucasian	Not Hispanic or Latin American	--	Stage II	22997	Survived	--	1288
ab954d5e-a19b-457a-b5b9-172afd6f9abe	TCGA-B8-5159	TCGA-KIRC	Female	1949	Caucasian	Not Hispanic or Latin American	--	Stage I	22462	Survived	--	722
cf059d8a-6c7a-48f4-a545-1160177d208d	TCGA-MH-A854	TCGA-KIRP	Female	1951	African descent	Not Hispanic or Latin American	--	Stage I	22804	Survived	--	536
2f38a984-c359-4d20-b23d-dca2d82f0270	TCGA-BP-5186	TCGA-KIRC	Female	1957	Caucasian	Not reported	--	Stage I	18348	Survived	--	693
9ec1c41f-495b-4715-956c-9f1ed0b47e01	TCGA-G7-A4TM	TCGA-KIRP	Male	1971	African descent	Not Hispanic or Latin American	--	Stage I	14966	Survived	--	768
6eb010c4-c906-42d4-894d-8b47de90e023	TCGA-KV-A74V	TCGA-KIRP	Male	1973	Caucasian	Not Hispanic or Latin American	--	Stage I	14834	Survived	--	347
02ec7a3a-2812-4a65-93cd-07bf655cc91b	TCGA-KL-8333	TCGA-KICH	Male	1936	Caucasian	Not reported	--	Stage II	25229	Survived	--	2991
73c712fe-54d6-4743-90bb-03313eb9fa77	TCGA-CJ-4920	TCGA-KIRC	Female	1940	Caucasian	Not Hispanic or Latin American	2004	Stage I	23656	Deceased	139	--
f1c1502e-1bd6-425a-b651-454363809668	TCGA-KN-8437	TCGA-KICH	Female	1964	Caucasian	Not Hispanic or Latin American	--	Stage I	15475	Survived	--	3068
d9f1bb02-4cb0-4f7c-8f34-ff5f301c6b2c	TCGA-BP-4161	TCGA-KIRC	Male	1928	Caucasian	Not reported	--	Stage I	27119	Survived	--	2746
c15d5920-4f59-4e31-9ba6-1f2de8ab5d5d	TCGA-BP-4177	TCGA-KIRC	Male	1940	Caucasian	Not Hispanic or Latin American	--	Stage I	23955	Survived	--	1670
46bc69a9-0090-4809-92b8-8cb741d9007d	TCGA-B0-5115	TCGA-KIRC	Male	1966	Caucasian	Not Hispanic or Latin American	--	Stage IV	15935	Survived	--	1604
afd60992-f279-46ee-8fb9-53f6be850f6c	TCGA-B4-5834	TCGA-KIRC	Male	1951	Caucasian	Not Hispanic or Latin American	--	Stage I	21713	Survived	--	26
568bfbc4-a4e8-4808-b458-5eaf56e83c45	TCGA-A4-7732	TCGA-KIRP	Male	1956	African descent	Not Hispanic or Latin American	--	Not reported	20226	Survived	--	582
5503f854-8eea-49b7-a196-bdc6c3c5815b	TCGA-UZ-A9PV	TCGA-KIRP	Male	--	Caucasian	Not Hispanic or Latin American	--	Stage I	23741	Survived	--	1444
03b2ac94-05a3-49a7-b68f-51d045395b07	TCGA-B0-5077	TCGA-KIRC	Male	1928	Caucasian	Not Hispanic or Latin American	2008	Stage I	28405	Deceased	1317	--
5daf4808-0393-4791-9927-742c30a20831	TCGA-BP-5194	TCGA-KIRC	Male	1969	Caucasian	Not reported	--	Stage I	14551	Survived	--	408
3ea341e3-868a-44f5-937f-e6a93b031544	TCGA-CJ-4882	TCGA-KIRC	Male	1948	African descent	Not Hispanic or Latin American	--	Stage III	21074	Survived	--	1883
551e8a06-382f-4cc3-b6b4-6ad61181f1f7	TCGA-B4-5378	TCGA-KIRC	Male	1948	Caucasian	Not Hispanic or Latin American	--	Stage I	22980	Survived	--	175
12adefc4-c9fd-46d3-904b-8fc52d5f1913	TCGA-B0-4696	TCGA-KIRC	Male	1943	Caucasian	Not Hispanic or Latin American	2003	Stage III	21317	Deceased	866	--
13e25128-9be1-4f67-a43f-a8744a619203	TCGA-CZ-5989	TCGA-KIRC	Male	1946	Caucasian	Not Hispanic or Latin American	--	Stage II	22170	Survived	--	1905
1cdb170b-9765-45ee-9e3e-388d0a419746	TCGA-BP-4158	TCGA-KIRC	Male	1932	Caucasian	Not reported	--	Stage I	25210	Survived	--	3377
d6ea5cec-97bf-4c0f-85bf-293d463b0586	TCGA-BP-5001	TCGA-KIRC	Female	1964	Caucasian	Not reported	--	Stage I	15858	Survived	--	1177
b2feca3f-8602-4a30-92bf-958ab2a2bd5d	TCGA-AK-3436	TCGA-KIRC	Male	1965	Caucasian	Not Hispanic or Latin American	--	Stage IV	14842	Survived	--	3331
3cba0f75-a95d-43e5-815b-a2582a80df05	TCGA-J7-6720	TCGA-KIRP	Male	1968	Asian	Not Hispanic or Latin American	--	Stage I	15620	Survived	--	388
047c0040-6eb9-4a05-923d-ec485585baac	TCGA-2Z-A9JN	TCGA-KIRP	Female	1962	African descent	Not Hispanic or Latin American	--	Stage I	18264	Survived	--	740
b7719c71-de18-4a4d-99ef-67b788c6f77c	TCGA-CJ-4635	TCGA-KIRC	Male	1956	Caucasian	Hispanic or Latin American	--	Stage I	17620	Survived	--	1416
dd9f2a45-cec8-438a-9059-74752880a90e	TCGA-UZ-A9PU	TCGA-KIRP	Male	--	Caucasian	Not Hispanic or Latin American	--	Stage I	28124	Deceased	933	--
151f07f5-1529-4fcd-912c-e55b2ff8abef	TCGA-KO-8407	TCGA-KICH	Male	1963	Caucasian	Not Hispanic or Latin American	--	Stage II	15407	Survived	--	2820
94394c85-6a69-4553-b1ee-c2364d5b4dd1	TCGA-F9-A8NY	TCGA-KIRP	Female	1975	Asian	Not Hispanic or Latin American	--	Stage IV	14101	Survived	--	36
ea26d89f-2843-489b-8627-3d5ed0cabc2a	TCGA-CZ-5984	TCGA-KIRC	Male	1954	Caucasian	Not reported	--	Stage I	18775	Survived	--	2067
e3d519cf-7727-4ae1-92d1-156f5add1701	TCGA-UZ-A9PQ	TCGA-KIRP	Male	--	African descent	Not Hispanic or Latin American	--	Stage III	21550	Deceased	2624	2182
52d73201-9333-422f-a530-5958e866a298	TCGA-B2-4098	TCGA-KIRC	Female	1938	African descent	Not Hispanic or Latin American	2010	Stage I	26606	Deceased	51	--
f31ba8ec-a3dd-4dd8-8d15-f6c5975ebe44	TCGA-KM-8441	TCGA-KICH	Female	1950	Caucasian	Not Hispanic or Latin American	--	Stage I	22303	Survived	--	876
3f0a2571-c088-4735-8152-61f6fd60ac63	TCGA-G6-A5PC	TCGA-KIRC	Female	1958	African descent	Not Hispanic or Latin American	2012	Stage IV	20029	Deceased	242	--
03ae8fdb-8a9c-401d-b8e3-b5ea57bad182	TCGA-B0-5097	TCGA-KIRC	Female	1951	Caucasian	Not Hispanic or Latin American	--	Stage III	21852	Survived	--	665
0631dc8c-5950-4419-adf2-ec3b1e259fc8	TCGA-CJ-5686	TCGA-KIRC	Female	1946	Caucasian	Not Hispanic or Latin American	--	Stage I	21836	Survived	--	2038
3c5f27e9-db2f-4963-9240-94815808d32f	TCGA-AK-3440	TCGA-KIRC	Male	1947	Caucasian	Not Hispanic or Latin American	--	Stage I	21337	Survived	--	2865
e4cc8898-d1d8-4f6d-b01c-04cd30f0cd8f	TCGA-A3-3359	TCGA-KIRC	Female	1923	Caucasian	Not Hispanic or Latin American	--	Stage I	30269	Survived	--	2504
bbdaa931-e922-49be-bfbf-fa0c2ae27d7a	TCGA-CW-6087	TCGA-KIRC	Male	1942	Caucasian	Not Hispanic or Latin American	2003	Stage IV	22438	Deceased	41	--
39034b58-1fe1-4cae-ad3e-3ee291f1b4d0	TCGA-KL-8338	TCGA-KICH	Male	1955	Caucasian	Not reported	--	Stage III	18667	Survived	--	2633
02b5012e-f7ac-4423-8978-0b2f5e50926e	TCGA-BP-4759	TCGA-KIRC	Male	1954	Caucasian	Not Hispanic or Latin American	--	Stage I	18569	Survived	--	2372
e562c60c-8e6e-481f-ad4f-28b067437ece	TCGA-KO-8414	TCGA-KICH	Female	1956	Caucasian	Not Hispanic or Latin American	--	Stage II	18502	Survived	--	3212
a122d361-835e-4cf2-850f-af7864aa112c	TCGA-KL-8346	TCGA-KICH	Male	1946	Caucasian	Not reported	--	Stage II	22651	Survived	--	1897
e08c161c-a9ac-4001-b567-2c15bef66fd5	TCGA-2Z-A9JP	TCGA-KIRP	Male	1948	Caucasian	Not Hispanic or Latin American	--	Stage I	23207	Survived	--	893
18bcef21-1eee-4b9f-9345-b2f5799b49ab	TCGA-B0-4697	TCGA-KIRC	Female	1957	Caucasian	Not Hispanic or Latin American	2004	Stage IV	16844	Deceased	578	--
f1ec5a7b-0973-4c38-9908-862196df9541	TCGA-B1-A47N	TCGA-KIRP	Male	1950	Caucasian	Not Hispanic or Latin American	--	Stage I	22800	Survived	--	1110
a4225cb2-7b4b-4122-b6b9-629c26e3ea56	TCGA-B9-A69E	TCGA-KIRP	Male	1942	Caucasian	Not Hispanic or Latin American	--	Stage III	26198	Survived	--	452
5ec1ec7b-9ef3-45fc-98a6-0202d15050fe	TCGA-B0-4818	TCGA-KIRC	Female	1934	Caucasian	Not Hispanic or Latin American	2003	Stage II	24853	Deceased	510	--
0022478c-4dfd-4cbe-a05e-fb20310844e3	TCGA-B0-5088	TCGA-KIRC	Male	1953	Caucasian	Not Hispanic or Latin American	2007	Stage I	19677	Deceased	563	--
5f633c79-fcf8-47da-b349-ada3fb794819	TCGA-KL-8337	TCGA-KICH	Male	1980	African descent	Not reported	--	Stage II	9819	Survived	--	1364
11ab53c8-6366-4bc9-b60d-23e6ed2d1cae	TCGA-A3-3372	TCGA-KIRC	Male	1943	Caucasian	Not reported	--	Stage III	23528	Survived	--	735
d2664fde-ce3b-45e6-9a23-4a07980f7bac	TCGA-CJ-5677	TCGA-KIRC	Female	1950	Caucasian	Not Hispanic or Latin American	2006	Stage IV	19849	Deceased	782	--
844ec449-eec0-4ea7-9da9-b75a164bef16	TCGA-B0-4847	TCGA-KIRC	Male	1944	Caucasian	Not Hispanic or Latin American	2006	Stage IV	22147	Deceased	793	--
12560466-52ca-4114-8c9b-4853599628f1	TCGA-GL-A9DC	TCGA-KIRP	Female	1947	Caucasian	Not Hispanic or Latin American	--	Stage I	24348	Survived	--	392
0b83c47f-246c-4af1-b4c0-2b880edbf2d4	TCGA-UZ-A9Q1	TCGA-KIRP	Female	--	Caucasian	Not Hispanic or Latin American	--	Stage I	32142	Survived	--	1562
8b3c068d-5090-4030-8e7e-39da005dee79	TCGA-A4-A4ZT	TCGA-KIRP	Female	1941	Caucasian	Not Hispanic or Latin American	--	Stage I	26058	Survived	--	516
89ea18fc-45ec-4e5c-969a-db2112dceefd	TCGA-B8-5165	TCGA-KIRC	Male	1967	Caucasian	Not Hispanic or Latin American	--	Stage I	15898	Survived	--	737
fa55865d-65b7-4587-800e-17b6b7f77517	TCGA-SX-A71S	TCGA-KIRP	Female	1944	Caucasian	Not Hispanic or Latin American	--	Stage I	24211	Survived	--	1504
366219b9-fde3-4d2d-82d3-15fe6245aa98	TCGA-KN-8429	TCGA-KICH	Female	1968	Caucasian	Not reported	--	Stage III	13903	Survived	--	2650
c558dffe-5aea-467e-ae4c-fdc2a43ab2fe	TCGA-BP-5180	TCGA-KIRC	Male	1951	Caucasian	Not reported	--	Stage I	19413	Survived	--	2263
d1e4f4c0-08cc-4012-9372-9ab987d80dab	TCGA-CJ-4894	TCGA-KIRC	Male	1947	Caucasian	Not Hispanic or Latin American	2007	Stage III	21524	Deceased	841	841
2c084454-18e9-4837-9bba-7e91a73a48e0	TCGA-GL-A4EM	TCGA-KIRP	Male	1950	Caucasian	Not Hispanic or Latin American	--	Stage I	22635	Survived	--	32
9aabcbd7-a26a-49b1-abf1-02c0dc3adcf2	TCGA-KL-8334	TCGA-KICH	Female	1968	Caucasian	Not reported	--	Stage III	13602	Survived	--	2949
fcad8f85-0046-4fc9-9611-3bf8ac91e887	TCGA-A4-8630	TCGA-KIRP	Female	1953	Caucasian	Not Hispanic or Latin American	--	Stage I	21884	Survived	--	436
8c9e1f60-1838-4aa4-a667-c1cef7dddbdf	TCGA-KN-8424	TCGA-KICH	Female	1963	Caucasian	Not reported	--	Stage I	15384	Survived	--	1983
aebe37c4-5b37-41f3-ade3-46e41bad8eab	TCGA-BP-4987	TCGA-KIRC	Female	1965	Asian	Not reported	--	Stage I	15041	Survived	--	1124
500636a5-d42b-469f-98e2-fdd4dddc61a0	TCGA-BP-4787	TCGA-KIRC	Female	1948	Caucasian	Not reported	2008	Stage IV	21697	Deceased	480	--
772e3aed-f211-42a1-9ab2-1c543f581541	TCGA-CJ-4637	TCGA-KIRC	Female	1952	Caucasian	Hispanic or Latin American	2010	Stage IV	19101	Deceased	2227	--
57959b73-534d-450c-b09d-f70ef1ffee25	TCGA-BP-4346	TCGA-KIRC	Male	1949	Caucasian	Not reported	2010	Stage III	21057	Deceased	1493	--
cc353686-e2b6-46a1-8095-48e2bc44b11f	TCGA-BP-4977	TCGA-KIRC	Male	1949	Caucasian	Not reported	--	Stage I	20950	Survived	--	454
5338d435-68fb-4f0d-a3e6-c843f703f75f	TCGA-CJ-4885	TCGA-KIRC	Male	1941	Caucasian	Not Hispanic or Latin American	--	Stage IV	23437	Survived	--	3451
1592435b-a79a-4fae-90f7-74b193777f08	TCGA-A4-8516	TCGA-KIRP	Male	1950	Caucasian	Not Hispanic or Latin American	--	Stage III	22879	Survived	--	23
e53893e7-cfaf-49bb-917f-6d549652b319	TCGA-A4-7288	TCGA-KIRP	Female	1937	Caucasian	Not Hispanic or Latin American	--	Not reported	26268	Survived	--	1857
89500416-1a5e-4f52-a1b9-6394f3943e4d	TCGA-BP-4991	TCGA-KIRC	Male	1953	Caucasian	Not reported	--	Stage I	19739	Survived	--	1413
455fd7d4-5ff4-423f-83ce-4630aef89bb7	TCGA-KN-8428	TCGA-KICH	Male	1935	Caucasian	Not Hispanic or Latin American	2010	Stage II	26252	Deceased	1590	--
74844571-c5a3-4a14-ac19-c7c1ce40259b	TCGA-B0-5702	TCGA-KIRC	Male	1936	Caucasian	Not Hispanic or Latin American	--	Stage I	26186	Survived	--	2172
50f914de-0410-4fe1-8e97-2fbd8be2efc0	TCGA-BQ-5883	TCGA-KIRP	Female	1928	African descent	Not reported	--	Stage I	28877	Survived	--	1242
83444c79-6aa5-4081-9143-2055a360e211	TCGA-CJ-4892	TCGA-KIRC	Female	1940	Caucasian	Not Hispanic or Latin American	--	Stage I	23764	Survived	--	1521
820ddb1a-fb51-42e9-8d33-3ebe28d5af93	TCGA-CJ-4872	TCGA-KIRC	Male	1953	Caucasian	Not Hispanic or Latin American	--	Stage I	18862	Survived	--	326
f964511a-09ed-4a56-a477-0ab1cf067275	TCGA-CJ-4889	TCGA-KIRC	Female	1942	Caucasian	Hispanic or Latin American	--	Stage I	23051	Survived	--	1946
aba26e6b-f11c-4ae6-a0d6-85bdd2060e8f	TCGA-DV-5567	TCGA-KIRC	Female	1968	African descent	Not Hispanic or Latin American	--	Stage I	14642	Survived	--	2004
04004bc7-cc5c-4683-b334-3e14a7c2f384	TCGA-B0-4843	TCGA-KIRC	Male	1947	Caucasian	Not Hispanic or Latin American	2004	Stage III	21088	Deceased	320	--
f1ae0181-74f8-47fd-83be-83a7d01101cc	TCGA-CW-5591	TCGA-KIRC	Male	1948	Caucasian	Not Hispanic or Latin American	--	Stage IV	20712	Survived	--	2271
9490cd1e-be30-45d3-b1ea-42c157d5f49d	TCGA-BP-5176	TCGA-KIRC	Female	1926	Caucasian	Not reported	2008	Stage I	28727	Deceased	1590	--
34e8fbd8-ed33-4d11-af4a-dd33af37fe28	TCGA-BP-4340	TCGA-KIRC	Female	1933	Caucasian	Not reported	2004	Stage I	25752	Deceased	562	--
ef2d7ef5-cdfc-48c9-b3fe-6eaf3be1106d	TCGA-DV-A4VX	TCGA-KIRC	Male	1949	African descent	Not Hispanic or Latin American	2012	Stage IV	21670	Deceased	1626	--
a55e63a9-5046-4f0f-a1e1-197b783d5387	TCGA-A3-3331	TCGA-KIRC	Female	1919	Caucasian	Not Hispanic or Latin American	--	Stage I	31615	Survived	--	1485
576ea0ef-3abb-479d-adb7-ba646cee344e	TCGA-B0-5703	TCGA-KIRC	Male	1936	Caucasian	Not Hispanic or Latin American	--	Stage I	26897	Survived	--	2246
2ed3296a-5b10-40d8-8af4-90dc031657cd	TCGA-AK-3455	TCGA-KIRC	Female	1936	Caucasian	Not Hispanic or Latin American	2008	Stage III	26221	Deceased	683	--
6b1ff32f-75a4-44aa-9da4-b6872e179c9f	TCGA-B0-5107	TCGA-KIRC	Female	1942	Caucasian	Not Hispanic or Latin American	2009	Stage IV	23929	Deceased	927	--
479035f0-649e-4396-b023-1649a23a01f1	TCGA-B0-5081	TCGA-KIRC	Female	1926	Caucasian	Not Hispanic or Latin American	2005	Stage III	29219	Deceased	362	--
31201e73-a922-4acd-b859-fa2f9ba0af93	TCGA-BP-4771	TCGA-KIRC	Male	1943	Caucasian	Not reported	2005	Stage IV	22771	Deceased	162	--
b11234b9-93d5-46df-bb67-110d6ed3e664	TCGA-DW-7834	TCGA-KIRP	Male	1948	Caucasian	Not Hispanic or Latin American	--	Stage I	19660	Survived	--	3950
3c1b6de7-c45f-4d86-be4b-a72ca7ca7cf9	TCGA-BP-4165	TCGA-KIRC	Female	1938	Caucasian	Not reported	--	Stage I	23685	Survived	--	3037
d66c9261-6c0c-44b0-92fa-a43757f34cb2	TCGA-2Z-A9J7	TCGA-KIRP	Male	1944	Caucasian	Not Hispanic or Latin American	2007	Stage IV	23230	Deceased	139	--
3f93d1cf-a307-4e29-9e6f-239e9ffaa179	TCGA-CW-6093	TCGA-KIRC	Male	1931	Caucasian	Not Hispanic or Latin American	--	Stage I	26909	Survived	--	3146
43d92569-fe5d-4eeb-a9cc-f7cd26fb3284	TCGA-UZ-A9PO	TCGA-KIRP	Male	--	Caucasian	Not Hispanic or Latin American	--	Stage I	29220	Survived	--	1911
17d053f2-8760-4f8e-9d25-64508e7f3857	TCGA-AK-3434	TCGA-KIRC	Male	1932	Caucasian	Not Hispanic or Latin American	--	Stage I	26490	Survived	--	2087
fd5728e0-e495-45f5-aac8-c0856510c8aa	TCGA-AK-3453	TCGA-KIRC	Female	1948	Caucasian	Not Hispanic or Latin American	--	Stage II	21271	Survived	--	2531
f3ba1cf8-ac67-4da8-96f3-8680dc55f247	TCGA-KN-8418	TCGA-KICH	Female	1961	Caucasian	Not reported	--	Stage II	15086	Survived	--	3935
c814c26c-ee8e-4fd8-a3d3-441b302ead3b	TCGA-B0-5699	TCGA-KIRC	Male	1950	Caucasian	Not Hispanic or Latin American	--	Stage I	19647	Survived	--	3841
4c325ee1-9b8e-45d4-a0a7-e47ec1eac402	TCGA-CJ-5682	TCGA-KIRC	Male	1944	Caucasian	Not Hispanic or Latin American	--	Stage IV	22244	Survived	--	3736
2711b4a4-9e6f-4a12-add6-c10f72e97d3c	TCGA-A3-A8OV	TCGA-KIRC	Male	1936	African descent	Not Hispanic or Latin American	--	Stage I	27526	Survived	--	340
49a756a9-7125-4b1d-bcfc-6cc44bdf26f6	TCGA-SX-A7SM	TCGA-KIRP	Male	1952	African descent	Not Hispanic or Latin American	2012	Stage IV	22044	Deceased	363	--
b5e873c1-1050-4c92-a26c-684aa26faa99	TCGA-2Z-A9J8	TCGA-KIRP	Male	1957	Caucasian	Not Hispanic or Latin American	--	Stage I	18498	Survived	--	2790
4edff57f-4b0e-4770-beac-590da7d7232c	TCGA-CJ-6033	TCGA-KIRC	Female	1950	Caucasian	Not Hispanic or Latin American	2004	Stage IV	19919	Deceased	224	--
5bad31ef-94b3-4765-a4de-6a0caf5d3154	TCGA-SX-A7SO	TCGA-KIRP	Male	1947	Caucasian	Not Hispanic or Latin American	--	Stage I	23534	Survived	--	1257
dc39df39-9945-4cb6-a852-d3b42177ac80	TCGA-IA-A83T	TCGA-KIRP	Male	1925	Caucasian	Not Hispanic or Latin American	2012	Not reported	29430	Deceased	2684	--
73292c19-d6a8-4bc4-97bc-ccce54f264f8	TCGA-2K-A9WE	TCGA-KIRP	Male	1960	Caucasian	Not Hispanic or Latin American	--	Stage II	19603	Survived	--	214
2a05f855-83cc-4276-befd-5d6d4ec18f82	TCGA-KO-8413	TCGA-KICH	Male	1960	Caucasian	Hispanic or Latin American	--	Stage I	17067	Survived	--	3038
c573a2f6-2404-4978-8ddc-91af27bab7c6	TCGA-BQ-5885	TCGA-KIRP	Male	1945	Caucasian	Not Hispanic or Latin American	--	Stage III	23173	Survived	--	921
d48bec14-6466-4924-a9e1-a37e31fcf83c	TCGA-P4-A5E7	TCGA-KIRP	Female	1930	Caucasian	Not Hispanic or Latin American	--	Stage I	27029	Survived	--	2649
bbb4578f-2df7-42fe-9e52-f923da05b4d0	TCGA-UZ-A9PZ	TCGA-KIRP	Male	--	Caucasian	Not Hispanic or Latin American	--	Stage III	23741	Survived	--	657
f2fca062-ca87-4089-916d-49b9ff146797	TCGA-CJ-4888	TCGA-KIRC	Male	1946	Caucasian	Not Hispanic or Latin American	2009	Stage IV	21701	Deceased	1567	--
04552448-4629-45c3-b2ab-0c1dec9c36cd	TCGA-HE-7129	TCGA-KIRP	Male	--	Not reported	Not reported	--	Stage II	--	Survived	--	2492
55b8d871-dbff-4c4a-8f73-82565588c23f	TCGA-DW-5560	TCGA-KIRP	Female	1971	Caucasian	Not Hispanic or Latin American	--	Stage I	13964	Survived	--	1486
8e50e35f-3fb3-4f1a-b4d5-4bacd31bb0bd	TCGA-DZ-6132	TCGA-KIRP	Male	1934	Not reported	Not reported	--	Stage I	25417	Survived	--	2460
c5265ca6-2cb5-406d-a635-c4c783561107	TCGA-AK-3426	TCGA-KIRC	Male	1967	Caucasian	Not Hispanic or Latin American	2006	Stage III	13770	Deceased	885	--
6208a0a6-104e-48e6-964c-39d120b418d3	TCGA-GL-A9DE	TCGA-KIRP	Male	1939	African descent	Not Hispanic or Latin American	--	Stage I	27330	Survived	--	496
a5b3de4c-f3fa-414c-b809-59c3c1438aa7	TCGA-Y8-A8RY	TCGA-KIRP	Male	1949	Caucasian	Not Hispanic or Latin American	--	Stage I	23192	Survived	--	769
267ff78b-bceb-466e-8582-c560fe227ff0	TCGA-CJ-4918	TCGA-KIRC	Male	1941	Caucasian	Not Hispanic or Latin American	2005	Stage IV	23379	Deceased	93	--
44130745-0b09-4201-829f-cc634f462d3b	TCGA-B0-4816	TCGA-KIRC	Male	1953	Caucasian	Not Hispanic or Latin American	2005	Stage II	18133	Deceased	1371	--
2ea84e23-6a0a-4c5d-9c70-d5355a85df35	TCGA-KM-8639	TCGA-KICH	Male	1938	Caucasian	Not Hispanic or Latin American	--	Stage I	24640	Survived	--	953
b9fc9eff-1228-482d-87a2-ebbb5c92733a	TCGA-BP-5191	TCGA-KIRC	Male	1928	Caucasian	Not Hispanic or Latin American	--	Stage III	29207	Survived	--	967
a40beabe-496e-4324-a1d1-5a7d8b002aab	TCGA-MH-A560	TCGA-KIRP	Male	1949	Caucasian	Not Hispanic or Latin American	--	Stage I	22866	Survived	--	924
4a88bc85-4c6e-4fac-8dbb-d3fc5f36b35e	TCGA-KN-8422	TCGA-KICH	Female	1977	Caucasian	Not reported	--	Stage I	10303	Survived	--	775
cfbeefdc-667f-4df0-967f-74b625f0d96a	TCGA-A4-7583	TCGA-KIRP	Male	1951	African descent	Not Hispanic or Latin American	--	Stage I	21962	Survived	--	3
919e9d37-3c44-4d15-a246-b7af1c13c1b8	TCGA-MH-A857	TCGA-KIRP	Male	1949	African descent	Not Hispanic or Latin American	--	Stage I	23114	Survived	--	890
ebef9db3-eedc-4015-940c-a8ccd07e0d25	TCGA-Y8-A895	TCGA-KIRP	Male	1939	Caucasian	Not Hispanic or Latin American	--	Stage I	27139	Survived	--	484
1bc2ad71-fb9d-4012-bfe7-c39e215a51eb	TCGA-B4-5835	TCGA-KIRC	Female	1946	Caucasian	Not Hispanic or Latin American	--	Stage I	23408	Survived	--	16
b81998f2-b3ff-4976-bc1c-8d38a68efa1d	TCGA-BP-4804	TCGA-KIRC	Male	1949	Caucasian	Not Hispanic or Latin American	--	Stage I	21727	Survived	--	1459
45bdcfd6-1e3f-4be8-b843-ae949e8e43eb	TCGA-MH-A562	TCGA-KIRP	Male	1955	African descent	Not Hispanic or Latin American	--	Stage I	20933	Survived	--	616
4481ca64-d37c-462d-9403-6b3339728e0c	TCGA-EU-5905	TCGA-KIRC	Female	1943	Caucasian	Not reported	--	Stage I	24475	Survived	--	119
c0f7147e-d28b-4358-9219-bb31f3012cff	TCGA-CJ-4886	TCGA-KIRC	Female	1963	Caucasian	Not Hispanic or Latin American	--	Stage I	15698	Survived	--	1952
e6e6a773-b155-45a9-989f-75c12ce1702a	TCGA-MH-A561	TCGA-KIRP	Male	1946	Caucasian	Hispanic or Latin American	--	Stage I	24271	Survived	--	841
7ef7c87e-6f11-4b9b-bb74-3c86036c8d20	TCGA-MH-A855	TCGA-KIRP	Female	1961	African descent	Not Hispanic or Latin American	--	Stage II	19029	Survived	--	369
e9faa588-d45a-450a-81a2-949eb2834bc0	TCGA-CZ-5452	TCGA-KIRC	Male	1937	Caucasian	Not Hispanic or Latin American	--	Stage II	25486	Survived	--	1789
2890b330-8ba5-4031-bed5-13e9d1d75af9	TCGA-CJ-6028	TCGA-KIRC	Male	1945	Caucasian	Not Hispanic or Latin American	2007	Stage IV	21380	Deceased	1625	--
659294b9-ded9-498a-bc00-c1d4d456aa4a	TCGA-A3-3363	TCGA-KIRC	Male	1956	Asian	Not reported	--	Stage II	18596	Survived	--	319
e33dff22-5bf1-4dd8-bed7-063cb555677c	TCGA-B0-4700	TCGA-KIRC	Male	1944	Caucasian	Not Hispanic or Latin American	2009	Stage IV	22034	Deceased	1980	--
9da334ed-314c-4445-ba29-ffd9bb42403c	TCGA-AK-3428	TCGA-KIRC	Male	1942	Caucasian	Not Hispanic or Latin American	--	Stage III	22653	Survived	--	3728
ff9328d5-d604-4276-866c-2d44ef3b2403	TCGA-BP-4176	TCGA-KIRC	Male	1941	Caucasian	Not reported	--	Stage I	23609	Survived	--	1955
2d8da564-e69f-4bfa-a1d3-227a294f3886	TCGA-CJ-4636	TCGA-KIRC	Male	1953	Caucasian	Not Hispanic or Latin American	--	Stage III	18878	Survived	--	1924
6988cf52-1e6e-4ed5-922b-044cf08a4553	TCGA-5P-A9JV	TCGA-KIRP	Male	1956	Caucasian	Not Hispanic or Latin American	--	Not reported	17973	Survived	--	2043
382291d3-6f93-4150-ae13-3d5951a39333	TCGA-BP-4803	TCGA-KIRC	Male	1929	Caucasian	Not reported	--	Stage III	28934	Survived	--	204
c793250d-1553-48e1-b6b2-aaffdfe5d39b	TCGA-BQ-5878	TCGA-KIRP	Female	1926	Caucasian	Not reported	--	Stage III	29010	Survived	--	1938
d99f31f7-2b3b-47e8-bd26-8d37da22aca0	TCGA-B0-4846	TCGA-KIRC	Male	1952	Caucasian	Not Hispanic or Latin American	2007	Stage IV	19139	Deceased	1200	--
094dbc57-e3a4-4319-8964-f29a06bd0203	TCGA-Y8-A897	TCGA-KIRP	Female	1945	Caucasian	Not Hispanic or Latin American	--	Stage I	25047	Survived	--	549
0487fc41-386c-4d76-9084-daf959bf5e98	TCGA-CW-5585	TCGA-KIRC	Male	1952	Caucasian	Not Hispanic or Latin American	--	Stage IV	18898	Survived	--	2609
6264f0dd-cc82-45f3-bee0-64f52307d324	TCGA-F9-A4JJ	TCGA-KIRP	Female	1977	African descent	Not reported	--	Stage III	12893	Deceased	325	97
1d37becb-7a1f-4d04-a0d1-bb14192b56f6	TCGA-G6-A8L7	TCGA-KIRC	Female	1927	African descent	Not Hispanic or Latin American	--	Stage I	29883	Survived	--	2133
e0e38071-877f-4ebf-955f-483eb4865351	TCGA-KL-8339	TCGA-KICH	Male	1939	Caucasian	Not reported	2008	Stage IV	24545	Deceased	855	--
75a53bff-bf0f-4ad8-9b8e-14a27914d4f2	TCGA-B3-3925	TCGA-KIRP	Male	1958	Caucasian	Not Hispanic or Latin American	--	Stage III	19224	Survived	--	1029
234a072c-f473-41bc-9d7a-39e0f949f7a5	TCGA-UZ-A9PM	TCGA-KIRP	Male	--	Caucasian	Not Hispanic or Latin American	--	Stage II	22646	Survived	--	3811
8d28f586-3de5-4033-a9fd-4f67be406fb4	TCGA-HE-A5NJ	TCGA-KIRP	Male	--	Not reported	Not reported	--	Not reported	21485	Survived	--	1726
59d18f0c-946f-4850-892f-70e2bf380232	TCGA-B8-A54E	TCGA-KIRC	Female	1949	African descent	Hispanic or Latin American	--	Stage I	22900	Survived	--	909
d4159990-85dd-4557-be1a-bd03818ea3ea	TCGA-B8-5163	TCGA-KIRC	Female	1947	Caucasian	Not Hispanic or Latin American	--	Stage III	23293	Survived	--	822
e7a1cbe2-793c-4747-8412-8be794f2382b	TCGA-G7-6790	TCGA-KIRP	Male	1950	Caucasian	Not Hispanic or Latin American	--	Stage I	21169	Survived	--	1575
ee7011e7-f692-410a-ba35-efe1ec75cf8e	TCGA-A3-3351	TCGA-KIRC	Male	1965	Caucasian	Hispanic or Latin American	--	Stage II	15562	Survived	--	910
949736aa-62d3-46e0-8507-ed2a84be0073	TCGA-B0-4691	TCGA-KIRC	Male	1954	Caucasian	Not Hispanic or Latin American	2009	Stage IV	20176	Deceased	139	--
21415ae7-dad6-40c4-be9d-3f881b558fbd	TCGA-B1-A654	TCGA-KIRP	Female	1969	African descent	Not Hispanic or Latin American	--	Stage I	15721	Survived	--	616
ce0ab696-4e50-4b05-a7e5-5191c257bfbe	TCGA-BP-4981	TCGA-KIRC	Female	1931	Caucasian	Not reported	2009	Stage III	27676	Deceased	1097	--
4f86dec5-34a7-4c11-9578-7e007a203cbf	TCGA-IA-A83W	TCGA-KIRP	Male	1933	Caucasian	Not Hispanic or Latin American	2008	Stage I	25678	Deceased	2043	--
83bdd67b-3dfd-458b-aaa1-5a0b051056e8	TCGA-BP-4170	TCGA-KIRC	Female	1931	Caucasian	Hispanic or Latin American	2009	Stage I	26596	Deceased	2343	--
f2b58595-dec0-4194-ab33-7c7dc6c058a6	TCGA-KN-8435	TCGA-KICH	Male	1945	Caucasian	Not Hispanic or Latin American	--	Stage II	21891	Survived	--	3498
dbe16232-525e-4101-9a39-9d4323b10ee9	TCGA-CJ-4871	TCGA-KIRC	Male	1941	Caucasian	Not Hispanic or Latin American	--	Stage IV	23195	Survived	--	2423
878d1caa-c4d8-4864-888c-310a0c1ee898	TCGA-CZ-5468	TCGA-KIRC	Male	1923	Caucasian	Not Hispanic or Latin American	2007	Stage IV	30729	Deceased	59	59
ffed886e-261e-464c-aa27-8204dd0eb9a1	TCGA-BP-4790	TCGA-KIRC	Male	1931	Caucasian	Not reported	2010	Stage I	28076	Deceased	1111	--
5dfd6430-e602-415c-905a-a894076940e6	TCGA-DW-7839	TCGA-KIRP	Female	1952	Caucasian	Not Hispanic or Latin American	--	Stage I	21347	Survived	--	419
6ccabcd0-8f30-4828-851f-0ac7cee1a33f	TCGA-BP-4329	TCGA-KIRC	Male	1927	Caucasian	Not reported	--	Stage III	27699	Deceased	845	845
d1a96a7a-2b11-48ce-869e-1fa19c1eb0a5	TCGA-A4-7996	TCGA-KIRP	Female	1950	Caucasian	Not Hispanic or Latin American	--	Stage I	22559	Survived	--	506
44598068-5220-4287-adad-0b4c3e21dc4b	TCGA-Y8-A8RZ	TCGA-KIRP	Male	1958	Caucasian	Not Hispanic or Latin American	--	Stage I	20386	Survived	--	112
db058eb4-9c5e-4226-92d1-de24aea83630	TCGA-B0-5693	TCGA-KIRC	Female	1956	Caucasian	Not Hispanic or Latin American	--	Stage I	17177	Survived	--	4074
4467ae73-499a-4af0-8431-e059d6ed21a5	TCGA-CJ-6027	TCGA-KIRC	Male	1926	Caucasian	Not Hispanic or Latin American	--	Stage I	28359	Deceased	3615	1855
ff127be4-631a-4e0e-a971-842f9eb6760e	TCGA-B0-4815	TCGA-KIRC	Male	1936	Caucasian	Not Hispanic or Latin American	2005	Stage III	23873	Deceased	1588	--
60df8616-8189-4d5c-8ebc-a05488cd9083	TCGA-DW-7963	TCGA-KIRP	Male	1967	African descent	Not Hispanic or Latin American	--	Stage I	15967	Survived	--	1240
060b2104-a015-400e-86c6-6febfb02bbd3	TCGA-A3-A6NN	TCGA-KIRC	Male	1934	African descent	Not Hispanic or Latin American	--	Stage I	28689	Survived	--	3
740e8238-8633-422a-a94a-83bbd37c6d77	TCGA-CJ-5683	TCGA-KIRC	Male	1926	Caucasian	Not Hispanic or Latin American	--	Stage I	28745	Survived	--	1889
e70c561a-1640-49d6-9662-f49b08118f1e	TCGA-DW-7838	TCGA-KIRP	Male	1943	Caucasian	Not Hispanic or Latin American	--	Stage I	24247	Survived	--	744
13afbde8-e5b5-4f3c-8a9d-daef71560005	TCGA-A4-A6HP	TCGA-KIRP	Male	1947	Caucasian	Not Hispanic or Latin American	--	Stage I	24447	Survived	--	379
9d12d90a-4948-434a-8802-8e83fd5fe01d	TCGA-SX-A7SQ	TCGA-KIRP	Male	1962	Caucasian	Not Hispanic or Latin American	--	Stage I	17696	Survived	--	1266
4100b960-7963-4a1e-ba24-0a6526387e06	TCGA-CW-6088	TCGA-KIRC	Male	1943	Caucasian	Not Hispanic or Latin American	--	Stage I	22020	Survived	--	3222
280d8569-0acb-47fa-a8f5-aa8540d89a94	TCGA-DW-7836	TCGA-KIRP	Male	1953	Caucasian	Not Hispanic or Latin American	--	Stage I	20269	Survived	--	1093
3cfe743c-f02e-42bf-a170-9d8b8a514d10	TCGA-BP-5004	TCGA-KIRC	Male	1954	Caucasian	Not reported	--	Stage I	19383	Survived	--	1126
6101ffe6-2ef6-4256-9d6b-a7c545836995	TCGA-KL-8325	TCGA-KICH	Female	1944	Caucasian	Not reported	2001	Stage II	20768	Deceased	725	--
1d9d253f-2de6-4eb6-8514-8ed3b041a83b	TCGA-5P-A9K0	TCGA-KIRP	Male	1932	Caucasian	Not Hispanic or Latin American	--	Not reported	27434	Survived	--	677
e4da964a-31da-4b81-b6ee-2c6dcee703ea	TCGA-A3-3323	TCGA-KIRC	Male	1953	Caucasian	Not reported	--	Stage I	19456	Survived	--	1106
452e96b0-dd23-4f5a-bc05-625763b0ee12	TCGA-KL-8345	TCGA-KICH	Male	1933	Caucasian	Not reported	--	Stage III	27412	Survived	--	1665
17846514-9a0a-40cd-8841-227e32a0c7db	TCGA-2Z-A9JM	TCGA-KIRP	Male	1984	Caucasian	Not Hispanic or Latin American	--	Stage I	10323	Survived	--	934
028d32fc-1b9f-49c6-9cb2-2d69671943cd	TCGA-BP-5174	TCGA-KIRC	Female	1959	Caucasian	Not Hispanic or Latin American	--	Stage I	16693	Survived	--	2257
db601d82-e2e7-469c-91da-3dbfcb477326	TCGA-BP-4964	TCGA-KIRC	Female	1951	Caucasian	Not reported	--	Stage I	20084	Survived	--	1862
6bed7cf2-4573-4757-adb3-032adc490ecd	TCGA-2Z-A9JT	TCGA-KIRP	Male	1941	Caucasian	Not Hispanic or Latin American	--	Stage I	26128	Survived	--	684
936c217f-f10b-43cf-bb6d-0a74ebec9b13	TCGA-DV-5576	TCGA-KIRC	Female	1953	African descent	Not Hispanic or Latin American	2009	Stage I	20310	Deceased	727	--
11111b58-c7df-4291-ad8a-4baec9ff7d1f	TCGA-B0-5694	TCGA-KIRC	Male	1937	Caucasian	Not Hispanic or Latin American	2009	Stage III	26060	Deceased	480	--
4a540448-f106-4b0e-9038-9f7ccefc785b	TCGA-2Z-A9J6	TCGA-KIRP	Male	1949	Caucasian	Not Hispanic or Latin American	--	Stage I	22265	Survived	--	1731
414056a2-b1dc-4741-b9b9-fda306da6ad6	TCGA-B0-4839	TCGA-KIRC	Female	1923	Caucasian	Not Hispanic or Latin American	2007	Stage I	29380	Deceased	1639	--
9c377f9b-79dd-4412-80ac-cea9a3529888	TCGA-B0-5692	TCGA-KIRC	Female	1938	Caucasian	Not Hispanic or Latin American	--	Stage III	24140	Survived	--	3944
69e6da3c-2a03-48bc-bc2a-019b21820149	TCGA-F9-A7VF	TCGA-KIRP	Female	1938	Caucasian	Not Hispanic or Latin American	--	Stage I	27446	Survived	--	73
22b6724c-a59f-4796-8166-992253e8caf1	TCGA-A3-3319	TCGA-KIRC	Male	1936	Caucasian	Not reported	--	Stage I	25699	Survived	--	1130
ccd44d97-f0d5-47cd-9c12-af458c750d23	TCGA-BP-4986	TCGA-KIRC	Male	1931	Caucasian	Hispanic or Latin American	--	Stage I	27612	Survived	--	785
1adb05d4-e1ca-4ede-81c7-ff24a243abae	TCGA-B2-4099	TCGA-KIRC	Male	1927	Caucasian	Not Hispanic or Latin American	--	Stage I	30355	Survived	--	972
98a639c2-d615-4dc1-98f0-298752b69b09	TCGA-HE-A5NH	TCGA-KIRP	Male	--	Not reported	Not reported	--	Stage I	22888	Survived	--	791
2a2f168c-f93a-4e83-8df2-93a3e7bc06a0	TCGA-BP-5000	TCGA-KIRC	Male	1967	Caucasian	Not reported	--	Stage I	14868	Survived	--	563
d3638a1f-da14-4c78-bb53-a5cc30850cbe	TCGA-BP-5185	TCGA-KIRC	Male	1951	Caucasian	Not reported	--	Stage I	20470	Survived	--	1132
b4a0bf74-1381-4c17-b97d-206810d9e59a	TCGA-KL-8343	TCGA-KICH	Male	1935	Caucasian	Not Hispanic or Latin American	--	Stage III	26562	Deceased	2172	1815
ee8c1919-17a9-4df1-8aa5-79546621b23c	TCGA-KO-8411	TCGA-KICH	Male	1946	Caucasian	Not Hispanic or Latin American	--	Stage I	21371	Survived	--	3958
a5d34ea3-9362-4233-8d9e-1892839179b2	TCGA-BP-4798	TCGA-KIRC	Male	1933	Caucasian	Not reported	2007	Not reported	27335	Deceased	334	--
dc04b82c-e1e8-4917-ba19-c2fea4a1b69a	TCGA-KN-8419	TCGA-KICH	Male	1961	African descent	Not Hispanic or Latin American	--	Stage II	15769	Survived	--	714
b5f51cf6-1013-4d4b-aff1-4b7e8f6afd9c	TCGA-BP-5006	TCGA-KIRC	Male	1946	Caucasian	Not reported	--	Stage I	22324	Survived	--	840
0b77657a-0297-4cee-b9f2-5de72e182016	TCGA-KO-8417	TCGA-KICH	Female	1977	Caucasian	Not Hispanic or Latin American	--	Stage I	11139	Survived	--	2815
f11f68ac-5ad2-416b-a0c2-697ac3e9718a	TCGA-CJ-4643	TCGA-KIRC	Female	1938	Caucasian	Hispanic or Latin American	--	Stage II	24477	Survived	--	1793
4cfe9a35-80f2-422b-82e8-8f4b12ded992	TCGA-B0-4707	TCGA-KIRC	Male	1945	Caucasian	Not Hispanic or Latin American	2009	Stage III	23322	Deceased	600	--
e45166cb-5150-4961-9e13-6891f02c1606	TCGA-CJ-4901	TCGA-KIRC	Male	1959	Caucasian	Not Hispanic or Latin American	--	Stage III	17396	Survived	--	1450
0b970feb-914f-4159-912f-6efec02b617f	TCGA-A3-3374	TCGA-KIRC	Female	1954	African descent	Not Hispanic or Latin American	--	Stage I	18890	Survived	--	1314
d52c3cb6-921e-4f26-b49c-e6e4f11f9c06	TCGA-KO-8405	TCGA-KICH	Male	1976	Caucasian	Hispanic or Latin American	--	Stage III	10671	Survived	--	3056
6a7a0f51-336a-445d-8a05-8b8811894037	TCGA-B0-4701	TCGA-KIRC	Female	1939	Caucasian	Not Hispanic or Latin American	2005	Stage IV	24232	Deceased	238	--
fcb7ed90-6c6b-4420-8d5b-4fc6f763adaa	TCGA-B9-A5W8	TCGA-KIRP	Male	1962	African descent	Not Hispanic or Latin American	--	Stage II	18440	Survived	--	524
db882417-af3c-4a86-9004-f7e943798409	TCGA-G7-A8LD	TCGA-KIRP	Male	1941	Caucasian	Not Hispanic or Latin American	2013	Stage III	25977	Deceased	514	--
2de427e2-b1f3-4915-9750-ab6414edc92e	TCGA-EU-5904	TCGA-KIRC	Female	1962	Caucasian	Not reported	--	Stage I	17468	Survived	--	551
7ac1d6c6-9ade-49af-8794-10b5b96b2b05	TCGA-A3-3307	TCGA-KIRC	Male	1939	Not reported	Not reported	--	Stage III	24315	Survived	--	1436
23c7555b-7a37-415d-bda8-3588078a0c2e	TCGA-BP-5189	TCGA-KIRC	Male	1947	Caucasian	Not Hispanic or Latin American	2009	Stage I	22156	Deceased	822	--
c6454371-1f84-4e8e-8c3a-2eac8380819e	TCGA-DV-5573	TCGA-KIRC	Male	1967	Caucasian	Not Hispanic or Latin American	--	Stage I	15264	Survived	--	1130
e548aeb2-04ca-48f8-af8d-8acb745748fc	TCGA-BP-5007	TCGA-KIRC	Male	1962	Caucasian	Not Hispanic or Latin American	--	Stage II	16793	Survived	--	1140
439794a8-51bd-4c70-968c-34cf26b90148	TCGA-B0-5113	TCGA-KIRC	Female	1941	Caucasian	Not Hispanic or Latin American	--	Stage III	25369	Survived	--	1175
955d428c-8fe8-456b-b86d-65ea6c2a1b18	TCGA-KN-8427	TCGA-KICH	Male	1952	Caucasian	Not reported	--	Stage IV	19854	Survived	--	30
f590f15b-21f5-4d99-9021-e5e1e0cc3758	TCGA-BQ-5886	TCGA-KIRP	Male	1934	Caucasian	Not reported	--	Stage III	27670	Survived	--	792
63dd7202-2ba3-41bb-8d05-8a7b4f34c7d1	TCGA-BP-4784	TCGA-KIRC	Female	1938	Caucasian	Not reported	--	Stage I	24603	Survived	--	1854
1e758394-67fb-45cb-98b0-5082c396d697	TCGA-B0-4828	TCGA-KIRC	Male	1924	Caucasian	Not Hispanic or Latin American	2003	Stage IV	28948	Deceased	307	--
e8c22f36-20ad-469f-8eac-fb52d8b2cd5c	TCGA-EV-5902	TCGA-KIRP	Male	1952	Caucasian	Not reported	--	Stage I	21344	Survived	--	578
897f85ec-7e14-426a-a532-eed01ccc90f1	TCGA-A3-3346	TCGA-KIRC	Male	1937	Caucasian	Not reported	2005	Stage I	25118	Deceased	137	--
8593764c-e468-4229-94de-6ba614b4f068	TCGA-AS-3778	TCGA-KIRC	Male	1975	Caucasian	Not Hispanic or Latin American	--	Stage I	12937	Survived	--	43
794aeb92-205f-4c75-bb1a-0b2c6db99fea	TCGA-B0-5690	TCGA-KIRC	Female	1951	Caucasian	Not Hispanic or Latin American	--	Stage I	19685	Survived	--	3392
3128d9bf-71fd-4edb-8d07-98f53ef0432e	TCGA-BP-5184	TCGA-KIRC	Male	1953	Caucasian	Not reported	--	Stage I	19746	Survived	--	1133
b3a6acab-00ad-48b7-94c2-bd56b461b48f	TCGA-AK-3429	TCGA-KIRC	Female	1950	Caucasian	Not Hispanic or Latin American	--	Stage II	19849	Survived	--	3328
551cade6-32e8-4aac-9e92-d6b113d4ed7f	TCGA-BQ-7060	TCGA-KIRP	Male	1958	american indian or alaska native	Not Hispanic or Latin American	--	Stage I	19479	Survived	--	214
ceb7cd9a-9cb1-42f2-a4ab-0b4381e2b85b	TCGA-CJ-5675	TCGA-KIRC	Male	1934	Caucasian	Not Hispanic or Latin American	--	Stage II	25617	Survived	--	3936
ee6dd13a-1436-48f5-8a9f-732898c1735f	TCGA-B3-8121	TCGA-KIRP	Female	1963	African descent	Not Hispanic or Latin American	--	Stage I	17760	Survived	--	379
97fee782-9aa3-41c7-8b7b-53c9c69bdabc	TCGA-AK-3427	TCGA-KIRC	Male	1939	Caucasian	Not Hispanic or Latin American	--	Stage I	24067	Survived	--	3583
31a0dd95-8199-4d25-b40d-4b353644af46	TCGA-B0-5691	TCGA-KIRC	Female	1936	Caucasian	Not Hispanic or Latin American	--	Stage I	24120	Survived	--	3431
5b66c4ae-3aed-4212-baa1-dac33bab8ebe	TCGA-B0-4698	TCGA-KIRC	Male	1928	Caucasian	Not Hispanic or Latin American	2003	Stage IV	27417	Deceased	42	--
24c1cf70-bd67-431e-a623-d20f8d3f52b2	TCGA-CJ-4881	TCGA-KIRC	Male	1963	Caucasian	Not Hispanic or Latin American	--	Stage III	15197	Survived	--	2014
fcecafa8-8b8b-4ae6-81bc-73acf05b211a	TCGA-CZ-4856	TCGA-KIRC	Female	1943	Caucasian	Not Hispanic or Latin American	--	Stage I	22684	Survived	--	18
e9f855b3-291b-449d-9758-caa0f99fa76d	TCGA-B0-5084	TCGA-KIRC	Male	1973	Caucasian	Not Hispanic or Latin American	2006	Stage IV	12219	Deceased	222	--
12c4c4f1-5880-4bf9-9945-80bf45415de6	TCGA-A3-3316	TCGA-KIRC	Male	1948	Caucasian	Not reported	--	Stage II	20931	Survived	--	1493
98ff8a6b-0ead-4e55-9fb7-6fe5cc69d0f6	TCGA-B0-4714	TCGA-KIRC	Male	1929	Caucasian	Not Hispanic or Latin American	2010	Stage IV	29873	Deceased	99	--
4519a839-11ea-4628-b5a7-071833ad16de	TCGA-CJ-4916	TCGA-KIRC	Female	1938	Caucasian	Not Hispanic or Latin American	--	Stage III	25470	Survived	--	1373
d3a226c3-a15c-4b3b-985b-211650cf0380	TCGA-5P-A9K6	TCGA-KIRP	Male	1945	Caucasian	Not Hispanic or Latin American	--	Not reported	23384	Survived	--	1914
75f5983b-553b-4a96-8625-867885e83db4	TCGA-B1-A655	TCGA-KIRP	Female	1935	Caucasian	Not Hispanic or Latin American	--	Stage I	28433	Survived	--	510
deace3d5-26fc-44d3-9f39-b5cde2c94152	TCGA-4A-A93X	TCGA-KIRP	Male	1955	Caucasian	Not Hispanic or Latin American	--	Stage IV	21348	Survived	--	390
2d813726-b8a6-4719-9323-a7496547e156	TCGA-BQ-7045	TCGA-KIRP	Male	1923	African descent	Not reported	2005	Stage I	28709	Deceased	1468	--
6369a2b1-921b-4d35-a0c8-6edac508a702	TCGA-BQ-7053	TCGA-KIRP	Female	1950	African descent	Hispanic or Latin American	--	Stage III	20837	Survived	--	1516
0d80fac4-f43e-4a67-b372-0af320966dbc	TCGA-DW-7840	TCGA-KIRP	Male	1951	African descent	Not Hispanic or Latin American	--	Stage I	22141	Survived	--	114
925ae8ff-3200-4564-be76-94db0984b027	TCGA-A4-A48D	TCGA-KIRP	Male	1928	African descent	Not Hispanic or Latin American	--	Stage I	31038	Survived	--	379
c1ea9a13-7f40-438b-a437-566d3d23f8bc	TCGA-G7-A8LB	TCGA-KIRP	Male	1943	Caucasian	Not Hispanic or Latin American	--	Stage IV	25782	Survived	--	547
eeacbbdc-68c9-4dce-8999-e1dbcb86c14a	TCGA-BP-4355	TCGA-KIRC	Female	1949	Caucasian	Not reported	2010	Stage III	21642	Deceased	953	--
0c139772-e303-45d1-b0c7-438fa1db105e	TCGA-A3-3311	TCGA-KIRC	Male	1948	Not reported	Not reported	2008	Stage I	21183	Deceased	1191	--
3f253cb2-ed66-4d02-a1d2-ba2f4320e61d	TCGA-5P-A9KH	TCGA-KIRP	Male	1928	Caucasian	Not Hispanic or Latin American	--	Not reported	28193	Survived	--	2051
07f596f7-8227-47d3-8e95-2e0b86f44f2b	TCGA-CJ-4908	TCGA-KIRC	Male	1968	Caucasian	Not Hispanic or Latin American	--	Stage I	14226	Survived	--	1531
d80f601b-1064-4ff0-9c51-7f6afb22d1f5	TCGA-A4-A57E	TCGA-KIRP	Male	1952	Caucasian	Not Hispanic or Latin American	--	Stage IV	21885	Deceased	258	0
6014f16b-5f3d-43ec-b8a7-7cf99583101a	TCGA-UZ-A9PS	TCGA-KIRP	Female	--	African descent	Not Hispanic or Latin American	--	Stage II	22646	Survived	--	2167
e1663694-17dd-4b01-b613-2516e022dfb7	TCGA-A3-3382	TCGA-KIRC	Male	1938	Caucasian	Not reported	--	Stage I	25207	Survived	--	574
7b4e529f-5ed9-4a81-94e6-7a62d604d46d	TCGA-CW-5588	TCGA-KIRC	Female	1926	Caucasian	Not Hispanic or Latin American	--	Stage I	28714	Survived	--	2017
92dec9c3-27c1-48c4-8184-5d8d12678992	TCGA-UZ-A9PK	TCGA-KIRP	Male	--	Caucasian	Not Hispanic or Latin American	--	Stage I	25933	Survived	--	3571
8e9e684c-20e5-48b1-9e40-970037fe959f	TCGA-CZ-5463	TCGA-KIRC	Male	1931	Caucasian	Not reported	--	Stage II	27911	Survived	--	662
dfd2c288-5054-4fc1-9cae-f437779dc2de	TCGA-B0-5697	TCGA-KIRC	Male	1957	Caucasian	Not Hispanic or Latin American	--	Stage I	18486	Survived	--	2630
36b46540-472f-4a4d-a801-b8b6ae660dc9	TCGA-HE-A5NF	TCGA-KIRP	Male	--	Not reported	Not reported	--	Stage I	21524	Survived	--	2582
4edd92e1-5da5-49a3-80e4-fa456aa425b8	TCGA-B9-4116	TCGA-KIRP	Female	1935	African descent	Not Hispanic or Latin American	--	Not reported	27692	Survived	--	627
34a19ed5-31a7-4ea4-91be-9fac72320e99	TCGA-G7-6797	TCGA-KIRP	Male	1964	Caucasian	Not Hispanic or Latin American	--	Stage III	17004	Survived	--	765
3b064b7e-c3cf-4fc3-844e-301a51737e35	TCGA-BP-4969	TCGA-KIRC	Female	1943	Caucasian	Not Hispanic or Latin American	--	Stage I	23216	Survived	--	1794
f2806652-1d7b-4c46-bb4e-ac7a2c96c68d	TCGA-CZ-5988	TCGA-KIRC	Male	1968	Caucasian	Not reported	--	Stage I	14131	Survived	--	693
552e78bb-dc9e-4c73-82bd-93a4bbea3a3a	TCGA-BQ-7055	TCGA-KIRP	Male	1935	Caucasian	Not reported	--	Stage I	26749	Survived	--	799
9f632fc3-2241-469a-a14a-cd537350155f	TCGA-A3-3370	TCGA-KIRC	Female	1958	Caucasian	Not Hispanic or Latin American	--	Stage I	17621	Survived	--	2274
9f4cd3b9-50ef-4f85-84b8-acb0b77887d1	TCGA-CJ-5684	TCGA-KIRC	Male	1944	Caucasian	Not Hispanic or Latin American	--	Stage III	22561	Survived	--	2231
a0f4ee95-b457-43cf-8b6c-0b6882dd99ce	TCGA-AL-7173	TCGA-KIRP	Female	1936	Caucasian	Not Hispanic or Latin American	--	Stage IV	26326	Survived	--	2060
07d409a0-d0dd-415a-95c3-38c26a518c56	TCGA-5P-A9JW	TCGA-KIRP	Male	1942	Caucasian	Not Hispanic or Latin American	--	Not reported	23570	Survived	--	3241
759238f2-0d37-404e-96f1-c26cae0ba2ea	TCGA-B0-4852	TCGA-KIRC	Female	1926	Caucasian	Not Hispanic or Latin American	2007	Stage II	28552	Deceased	1121	--
f07a7717-f6eb-40b7-82ea-0aa9d17ec337	TCGA-AL-3471	TCGA-KIRP	Male	1932	Caucasian	Not Hispanic or Latin American	--	Stage I	27249	Deceased	1500	412
2953131e-9c34-4fa2-8af4-2c8d66ea2821	TCGA-A3-A6NI	TCGA-KIRC	Male	1964	African descent	Not Hispanic or Latin American	--	Stage I	17190	Survived	--	1018
852effcd-8146-46e1-96fa-e5a9f09a88e2	TCGA-CJ-4634	TCGA-KIRC	Female	1944	Caucasian	Not Hispanic or Latin American	--	Stage I	22155	Survived	--	3498
5c73b91a-2bee-4388-854c-1c3a6ae732db	TCGA-BP-4998	TCGA-KIRC	Male	1958	Asian	Not reported	--	Stage I	17997	Survived	--	932
cf67eaf8-f5e6-41be-8992-cdb97091e1b0	TCGA-B0-5096	TCGA-KIRC	Female	1926	Caucasian	Not Hispanic or Latin American	1998	Stage III	26574	Deceased	68	--
06d86d68-0fd5-4c6e-8783-ed732a3291e8	TCGA-CJ-4869	TCGA-KIRC	Male	1955	Caucasian	Hispanic or Latin American	--	Stage III	17923	Survived	--	2554
9fb55e0b-43d8-40a3-8ef2-d198e6290551	TCGA-A3-3306	TCGA-KIRC	Male	1938	Caucasian	Not Hispanic or Latin American	--	Stage I	24569	Survived	--	1120
9b84d013-713b-4571-888c-12863fdd4a52	TCGA-BP-4327	TCGA-KIRC	Female	1927	Caucasian	Not reported	2002	Stage II	27556	Deceased	109	--
9aa63985-16ba-4d43-a6ec-4a35f2ff6513	TCGA-BP-4999	TCGA-KIRC	Male	1951	Caucasian	Not Hispanic or Latin American	--	Stage I	20518	Survived	--	1266
64aa0dd1-a80e-401e-96df-60d121d2cbec	TCGA-BP-5183	TCGA-KIRC	Male	1950	Caucasian	Hispanic or Latin American	--	Stage III	20881	Survived	--	1291
8f54d854-22ea-4bd0-8cb1-1ab708544095	TCGA-BP-5177	TCGA-KIRC	Female	1958	Caucasian	Not reported	--	Stage I	17147	Survived	--	293
fe1f95a3-a6c2-4a39-8586-f8a70e975dd4	TCGA-MM-A563	TCGA-KIRC	Male	1971	African descent	Not Hispanic or Latin American	--	Not reported	15037	Survived	--	591
d7ab7ec0-3de7-4ffd-a5ac-f75579355b2a	TCGA-B0-5402	TCGA-KIRC	Male	1946	Caucasian	Not Hispanic or Latin American	--	Stage IV	23477	Survived	--	1290
fdda296a-7321-4c8c-8076-40d92c570c8f	TCGA-AK-3433	TCGA-KIRC	Female	1956	Caucasian	Not Hispanic or Latin American	--	Stage II	17853	Survived	--	3409
3bd50bd2-c291-4362-9663-7b783a84ec43	TCGA-5P-A9KC	TCGA-KIRP	Female	1962	Caucasian	Not Hispanic or Latin American	--	Not reported	18975	Survived	--	377
6a6c1569-1045-4ed3-acdb-5c45e47614ca	TCGA-B1-A47O	TCGA-KIRP	Female	1958	Caucasian	Not Hispanic or Latin American	--	Stage I	19823	Survived	--	842
28e9b6f9-ab6a-400b-a6a9-79095a443591	TCGA-AK-3454	TCGA-KIRC	Male	1922	Caucasian	Not Hispanic or Latin American	--	Stage I	30862	Survived	--	874
ea456a1f-6e2c-4b34-ad24-ccd614bd57c9	TCGA-B8-A54G	TCGA-KIRC	Male	1962	African descent	Not Hispanic or Latin American	--	Stage I	18612	Survived	--	53
18325fdc-594b-4545-a77d-adb07a32ec73	TCGA-B8-4148	TCGA-KIRC	Female	1946	Caucasian	Not Hispanic or Latin American	--	Stage I	23062	Survived	--	1520
b123e7c1-2472-4427-bfeb-79666f971e66	TCGA-MW-A4EC	TCGA-KIRC	Female	1940	African descent	Hispanic or Latin American	--	Stage I	26649	Survived	--	498
c22d25c2-b836-4b91-8f4f-2062be002232	TCGA-BP-4775	TCGA-KIRC	Female	1950	Caucasian	Not reported	--	Stage I	20369	Survived	--	1843
5f53ace3-14ca-412a-af6c-98d8996f8177	TCGA-CW-6097	TCGA-KIRC	Male	1972	Caucasian	Not reported	2005	Stage III	11701	Deceased	571	--
68a1a23a-e762-440b-859e-2bebb42d0d59	TCGA-EU-5906	TCGA-KIRC	Male	1955	Caucasian	Not Hispanic or Latin American	--	Stage I	20246	Survived	--	206
f900767e-097b-4def-8a74-78fb042a039d	TCGA-BQ-5884	TCGA-KIRP	Female	1949	African descent	Not reported	--	Stage I	21730	Survived	--	792
424e5c99-3693-4b10-bbf0-fc43e851610c	TCGA-B2-3924	TCGA-KIRC	Male	1937	Caucasian	Not Hispanic or Latin American	--	Stage I	26846	Survived	--	1092
06197e26-3cb0-4bd0-a6e8-dd9af5047c6a	TCGA-CJ-4638	TCGA-KIRC	Female	1958	Caucasian	Not Hispanic or Latin American	2005	Stage IV	17110	Deceased	431	--
dc2208d9-dcb3-47ff-826b-676f199b8ccd	TCGA-BP-4989	TCGA-KIRC	Male	1949	Caucasian	Not reported	--	Stage III	21382	Survived	--	118
c499b3be-9db0-4809-b7c0-f5d81208d7ec	TCGA-BP-5173	TCGA-KIRC	Male	1929	Caucasian	Not reported	2004	Stage I	27436	Deceased	62	--
59f49821-412c-4945-b9e2-be0dcc8bf8bf	TCGA-B4-5836	TCGA-KIRC	Female	1949	Caucasian	Not Hispanic or Latin American	--	Stage I	22341	Survived	--	141
6a29783c-117b-479d-9910-18d629c00c51	TCGA-B1-5398	TCGA-KIRP	Male	1937	Caucasian	Not Hispanic or Latin American	--	Stage III	26820	Survived	--	1251
b39d6675-9378-4652-8a28-9b52b8ca88ce	TCGA-A3-A8CQ	TCGA-KIRC	Female	1952	African descent	Not Hispanic or Latin American	--	Stage I	21572	Survived	--	3
3ec3bcb3-492c-4942-be02-76a67f57e38f	TCGA-KL-8332	TCGA-KICH	Male	1949	Caucasian	Not reported	--	Stage I	20128	Survived	--	2582
26cc2c84-aaec-4cd1-9c45-dd08d372128d	TCGA-B0-4706	TCGA-KIRC	Male	1946	Caucasian	Not Hispanic or Latin American	2007	Stage III	22331	Deceased	65	26
75e02a42-6937-4761-868b-c369c7bd3c72	TCGA-B4-5832	TCGA-KIRC	Male	1945	Caucasian	Not Hispanic or Latin American	--	Stage III	23806	Survived	--	155
04ca8ab0-c10c-4300-8244-108ebc304410	TCGA-Y8-A8S1	TCGA-KIRP	Male	1952	Caucasian	Not Hispanic or Latin American	--	Stage I	22319	Survived	--	404
62c6edc7-170d-4825-ab81-f88b14013cc5	TCGA-B0-5085	TCGA-KIRC	Female	1929	Caucasian	Not Hispanic or Latin American	2007	Stage III	27793	Deceased	770	--
e173c4ba-9c08-4ce6-b46c-1673b5af9e2d	TCGA-BP-4971	TCGA-KIRC	Male	1966	Caucasian	Not reported	--	Stage III	14675	Survived	--	1487
08269082-cd8d-413a-a606-aa140cccc9e6	TCGA-B3-A6W5	TCGA-KIRP	Male	1970	African descent	Not Hispanic or Latin American	--	Stage I	15945	Survived	--	309
fc7065fc-d834-4e7d-98bd-ca6666beb6cb	TCGA-B2-A4SR	TCGA-KIRC	Male	1951	African descent	Not Hispanic or Latin American	--	Stage II	22637	Survived	--	507
a68bd706-58e7-4d36-bffa-6c94986a8d4e	TCGA-BP-4801	TCGA-KIRC	Male	1950	Caucasian	Not reported	--	Stage I	20825	Survived	--	1124
d51fa004-23e6-41a7-9237-ce9916e2e394	TCGA-B0-5092	TCGA-KIRC	Female	1955	Caucasian	Not Hispanic or Latin American	2009	Stage IV	19611	Deceased	459	--
872092b3-d31e-44d7-bd03-e29f52f8ab5a	TCGA-KM-8440	TCGA-KICH	Male	1972	African descent	Not Hispanic or Latin American	--	Stage III	13860	Survived	--	1366
793f2df2-87a3-47e2-9cc1-a1a0e8487b51	TCGA-BQ-5893	TCGA-KIRP	Male	1949	Caucasian	Not Hispanic or Latin American	2010	Stage IV	22320	Deceased	241	--
ca245eb0-c60e-4a94-afd8-ccf15c1008df	TCGA-5P-A9K4	TCGA-KIRP	Male	1954	Caucasian	Not Hispanic or Latin American	--	Not reported	19986	Survived	--	2184
2dde6b93-11a8-424f-9b54-b1a81cd26895	TCGA-BP-4762	TCGA-KIRC	Male	1962	Caucasian	Not reported	2007	Stage I	15358	Deceased	1343	--
4af65061-a15f-48d5-b4c0-30003386bf2e	TCGA-P4-A5EA	TCGA-KIRP	Female	1953	Caucasian	Not Hispanic or Latin American	2007	Stage III	19748	Deceased	201	--
adc5e117-f01a-4e4b-bcb8-3d1a726b01a1	TCGA-DZ-6133	TCGA-KIRP	Female	1938	Caucasian	Not reported	2008	Stage I	24311	Deceased	1557	--
b02a2698-d4d3-4977-a251-989694d60f73	TCGA-Y8-A8S0	TCGA-KIRP	Male	1955	Caucasian	Not Hispanic or Latin American	--	Stage I	21383	Survived	--	183
df1e2e79-0126-4f3a-85e3-36f59be04622	TCGA-T7-A92I	TCGA-KIRC	Female	1966	African descent	Not Hispanic or Latin American	--	Stage I	17331	Survived	--	356
b125ff14-4fb4-4f90-8622-fed49bdfe954	TCGA-B8-4622	TCGA-KIRC	Male	1953	Caucasian	Not Hispanic or Latin American	--	Stage IV	21135	Survived	--	1525
4d856b5d-a59b-45f2-a9b2-4d43ec8a20e4	TCGA-A3-3357	TCGA-KIRC	Male	1943	Caucasian	Not Hispanic or Latin American	--	Stage II	22825	Survived	--	2688
8d02978a-10cb-4bbf-8980-78aebe70bcd1	TCGA-A3-3328	TCGA-KIRC	Male	1928	Caucasian	Not Hispanic or Latin American	--	Stage I	29168	Survived	--	1385
b877d608-e4e0-4b28-9235-01dd65849cf7	TCGA-BQ-5879	TCGA-KIRP	Female	1973	Caucasian	Not reported	2006	Stage III	11862	Deceased	697	--
f76bb0cc-eb45-4a2b-9961-e94641a53dab	TCGA-IZ-A6M9	TCGA-KIRP	Male	1950	Caucasian	Not Hispanic or Latin American	--	Stage I	23149	Survived	--	376
70820391-13b4-438f-ba4a-c0804d4c2d76	TCGA-B4-5838	TCGA-KIRC	Male	1958	Caucasian	Not Hispanic or Latin American	--	Not reported	19242	Survived	--	166
6fbf13b2-614b-4c61-824b-81ae25daae31	TCGA-BP-4777	TCGA-KIRC	Male	1959	Caucasian	Not Hispanic or Latin American	--	Stage I	17133	Survived	--	1731
9626e62f-f984-463a-8ef3-677489191864	TCGA-SX-A7SS	TCGA-KIRP	Male	1943	Caucasian	Not Hispanic or Latin American	--	Stage I	24660	Survived	--	1615
c1b46fd8-1221-4641-a323-84bfb444a45f	TCGA-CJ-4897	TCGA-KIRC	Female	1926	Caucasian	Hispanic or Latin American	--	Stage III	29124	Survived	--	3341
9aa02d46-294b-4e99-b9ee-56edcbfb5275	TCGA-KO-8406	TCGA-KICH	Female	1988	Caucasian	Not Hispanic or Latin American	--	Stage I	6556	Survived	--	3145
9680b5ff-1882-434f-9981-e8ac33764b93	TCGA-KM-8477	TCGA-KICH	Male	1949	Caucasian	Not Hispanic or Latin American	--	Stage I	20491	Survived	--	1553
d8e6c4a2-7d2b-430c-8515-c2148c9bcda4	TCGA-A4-A772	TCGA-KIRP	Male	1974	Caucasian	Hispanic or Latin American	--	Stage I	14278	Survived	--	0
d4098753-2e83-42c1-a06b-c03f7700e70c	TCGA-BP-5195	TCGA-KIRC	Male	1933	Caucasian	Not Hispanic or Latin American	--	Stage I	27547	Survived	--	749
cff68090-09df-492b-874c-0caeb29f9361	TCGA-2Z-A9JD	TCGA-KIRP	Male	1943	Caucasian	Not Hispanic or Latin American	--	Stage I	24370	Survived	--	1060
2b1dea0a-6d55-4fdd-9c1c-0d9fbe03bd78	TCGA-3Z-A93Z	TCGA-KIRC	Male	1944	African descent	Not Hispanic or Latin American	--	Stage I	25205	Survived	--	385
f00224ff-eb5d-4e46-ac9c-02fd7230f0c2	TCGA-A4-8517	TCGA-KIRP	Male	1941	Caucasian	Not Hispanic or Latin American	--	Stage I	26090	Survived	--	597
d9208e7b-0b47-43ff-a4e8-d4e591e286c4	TCGA-BP-4354	TCGA-KIRC	Male	1966	Caucasian	Not reported	2008	Stage IV	14973	Deceased	1034	--
0300e3a3-c278-4c20-8739-6d8aa24588cb	TCGA-B9-5156	TCGA-KIRP	Male	1959	Caucasian	Not Hispanic or Latin American	--	Not reported	18841	Survived	--	1338
7c1f5540-ba4f-498d-ac15-b395197ec5f3	TCGA-A4-7286	TCGA-KIRP	Male	1969	Caucasian	Not Hispanic or Latin American	--	Not reported	15631	Survived	--	554
2d7e2ae4-09ba-40af-82ce-66ac7dbd4831	TCGA-BP-5169	TCGA-KIRC	Male	1934	Caucasian	Not reported	--	Stage I	25615	Survived	--	193
fae200ed-78e7-4d2d-82b5-aee63fc54d25	TCGA-BP-4982	TCGA-KIRC	Male	1964	Caucasian	Not reported	--	Stage I	15451	Survived	--	1014
c4bbbcd2-aa18-4b1f-99d4-93279e31d7e7	TCGA-CJ-4887	TCGA-KIRC	Male	1957	Caucasian	Not Hispanic or Latin American	2007	Stage IV	17611	Deceased	932	--
f72defb3-87ca-4efd-9dc7-d2068533fd98	TCGA-BP-4349	TCGA-KIRC	Female	1938	Caucasian	Not reported	--	Stage I	24853	Survived	--	372
1a726069-0b44-42ad-9a20-0ee90b31796b	TCGA-B3-4103	TCGA-KIRP	Male	1954	Caucasian	Not Hispanic or Latin American	--	Stage I	20708	Survived	--	930
d232f22d-a3e7-41c8-97e1-205de2b488aa	TCGA-CJ-4891	TCGA-KIRC	Female	1948	Caucasian	Not Hispanic or Latin American	2007	Stage III	21059	Deceased	819	--
d7cf4fc0-6357-4973-af4c-b456f430478a	TCGA-AK-3458	TCGA-KIRC	Male	1959	Caucasian	Not Hispanic or Latin American	--	Stage I	17557	Survived	--	1168
93b05e07-fd17-44ce-8735-dcc28264b229	TCGA-BQ-7049	TCGA-KIRP	Female	1960	Caucasian	Not reported	2008	Stage I	16717	Deceased	1364	--
d3b47e53-6f40-4fc8-b5a4-cbe548a770a9	TCGA-6D-AA2E	TCGA-KIRC	Female	1945	African descent	Not Hispanic or Latin American	--	Stage I	25043	Survived	--	362
b6d4e2d5-5739-4be3-8a4c-6e7a17d1d40f	TCGA-BP-5202	TCGA-KIRC	Male	1933	Caucasian	Not reported	--	Stage III	27556	Survived	--	29
62f5ceb7-bb0b-4248-850b-cc1cf012f570	TCGA-B0-5400	TCGA-KIRC	Female	1949	Caucasian	Not Hispanic or Latin American	--	Stage III	21819	Survived	--	1733
781c4776-7f82-4bc5-a490-291ebcebbca4	TCGA-BQ-7062	TCGA-KIRP	Male	1947	African descent	Not Hispanic or Latin American	--	Stage I	23559	Survived	--	116
52d80054-3745-438c-b96e-e344c4ee4a5d	TCGA-B0-4819	TCGA-KIRC	Female	1942	Caucasian	Not Hispanic or Latin American	2002	Stage IV	22220	Deceased	183	183
e5641df6-0d4f-4613-a012-c953f8b2017e	TCGA-DZ-6134	TCGA-KIRP	Male	1936	Caucasian	Not reported	--	Stage I	25529	Survived	--	1856
04e9a63a-d742-488c-8564-bf9d79aa2091	TCGA-KN-8431	TCGA-KICH	Female	1972	Not reported	Not reported	--	Stage II	13043	Survived	--	588
cba5705a-80dd-4496-9283-c5d3a92c7dba	TCGA-B8-4146	TCGA-KIRC	Female	1968	Caucasian	Not Hispanic or Latin American	--	Stage I	15063	Survived	--	511
2375ef64-8212-4ad4-97e8-bfa6d1db430f	TCGA-BP-4976	TCGA-KIRC	Male	1929	Caucasian	Not reported	--	Stage I	28380	Survived	--	1632
e4245fff-1281-40e5-87b4-4e42a18a3a63	TCGA-HE-A5NL	TCGA-KIRP	Male	--	Not reported	Not reported	--	Stage I	18913	Survived	--	767
9fe336a8-08a7-4fe7-bf45-afd6a8eb9c75	TCGA-CJ-4902	TCGA-KIRC	Male	1945	Caucasian	Not Hispanic or Latin American	--	Stage III	22424	Survived	--	1520
dfa9513d-4e09-405b-a80f-2987ec5c5263	TCGA-B8-4143	TCGA-KIRC	Female	1936	Caucasian	Not Hispanic or Latin American	2003	Stage IV	24132	Deceased	709	--
1e417b93-837d-4110-9090-239eb82c3e20	TCGA-BP-4968	TCGA-KIRC	Male	1966	Caucasian	Not Hispanic or Latin American	--	Stage I	14651	Survived	--	1746
7664c241-b369-4d76-9cd1-7f2bdc1d267f	TCGA-BP-4326	TCGA-KIRC	Female	1949	Caucasian	Not reported	--	Stage I	19376	Deceased	1625	1625
900b5f21-e8fb-4a3f-b8e3-ef098716e508	TCGA-CJ-4899	TCGA-KIRC	Male	1964	Asian	Not Hispanic or Latin American	--	Stage I	15637	Survived	--	1528
6b79d20c-d5bc-4580-837e-b36dfd0c199c	TCGA-CZ-5464	TCGA-KIRC	Male	1938	Caucasian	Not reported	--	Stage IV	25463	Survived	--	2128
9cffe9f2-421e-4596-b3ac-8788f862ab59	TCGA-B0-5102	TCGA-KIRC	Female	1925	Caucasian	Not Hispanic or Latin American	2006	Stage I	27152	Deceased	2764	--
f06bdea2-4528-4a14-9cea-280af6b4c702	TCGA-CZ-4858	TCGA-KIRC	Male	1966	Caucasian	Not Hispanic or Latin American	--	Stage II	14343	Deceased	2105	1943
646241fe-e202-4e72-ae61-84f577488968	TCGA-DZ-6131	TCGA-KIRP	Male	1972	Caucasian	Not reported	--	Stage III	11487	Survived	--	2429
73fc6ae6-7c5e-44de-a9a0-17292cbb01cc	TCGA-CW-5587	TCGA-KIRC	Female	1941	Caucasian	Not Hispanic or Latin American	--	Stage III	22693	Survived	--	2226
ad7ba244-67fa-4155-8f13-424bdcbb12e5	TCGA-5P-A9JZ	TCGA-KIRP	Female	1955	Caucasian	Not Hispanic or Latin American	--	Not reported	18885	Survived	--	2744
123b1a31-3635-4e90-b714-0c20df64cf0d	TCGA-B0-4694	TCGA-KIRC	Male	1937	Caucasian	Not Hispanic or Latin American	2009	Stage III	26582	Deceased	106	--
e7afc830-fa22-4562-a1f3-0f4f5a34eacd	TCGA-B8-5158	TCGA-KIRC	Male	1954	Caucasian	Not Hispanic or Latin American	--	Stage III	20764	Survived	--	1218
8d4b602b-d1a4-4d80-adf4-5f527de78d4b	TCGA-B0-4713	TCGA-KIRC	Female	1934	Caucasian	Not Hispanic or Latin American	2010	Stage III	27899	Deceased	202	--
8ffd330e-d8da-4c27-871c-89831a548f30	TCGA-SX-A71V	TCGA-KIRP	Male	1931	Caucasian	Not Hispanic or Latin American	--	Stage I	29332	Survived	--	876
8ed08632-b5b3-4be3-bd71-999456fa2d23	TCGA-A3-3380	TCGA-KIRC	Male	1953	Not reported	Hispanic or Latin American	--	Stage I	19828	Survived	--	567
3f05a719-e81e-4f0c-a5c1-f1733b7aba11	TCGA-BP-4169	TCGA-KIRC	Female	1927	Caucasian	Not reported	2004	Stage II	27778	Deceased	701	--
9ceefc7e-fba9-47eb-a0ca-2bc1fccb5490	TCGA-B0-5100	TCGA-KIRC	Male	1926	African descent	Not Hispanic or Latin American	2003	Stage III	26478	Deceased	1913	--
51de632d-e3ec-4995-90df-01b894cd68f6	TCGA-Y8-A894	TCGA-KIRP	Female	1956	Caucasian	Not Hispanic or Latin American	--	Stage I	20964	Survived	--	567
8e5a0feb-b044-49ef-8cea-80816e4c5635	TCGA-2Z-A9JR	TCGA-KIRP	Male	1955	Caucasian	Not Hispanic or Latin American	--	Stage I	20932	Survived	--	161
75801b19-6569-4345-8134-82344a412c21	TCGA-B0-4718	TCGA-KIRC	Male	1953	Caucasian	Not Hispanic or Latin American	--	Stage III	20910	Survived	--	1778
f085f014-2690-4ff0-910a-89176c78cfc9	TCGA-UZ-A9PX	TCGA-KIRP	Male	--	Caucasian	Not Hispanic or Latin American	--	Stage I	26663	Survived	--	1981
620baefa-db8f-4af9-9101-4b9b252fa73e	TCGA-MM-A564	TCGA-KIRC	Male	1944	African descent	Not Hispanic or Latin American	--	Stage II	24916	Survived	--	607
8ee720b5-6f3a-4921-85ab-70e75c0835b0	TCGA-A3-3317	TCGA-KIRC	Male	1938	Not reported	Not reported	--	Stage II	24803	Survived	--	1491
b34991f5-fa49-5b35-8e1b-95794d23ca12	TARGET-52-PARRCL	TARGET-RT	Female		Caucasian	Hispanic or Latin American		Stage II	214	Survived	--	2577
53f97589-3897-59d9-bb10-55bad19490f4	TARGET-52-PARZBI	TARGET-RT	Female		Caucasian	Not Hispanic or Latin American		Stage III	526	Deceased	252	252
645452f9-637b-5ac4-a9df-5d7fe1354401	TARGET-52-PAUDPV	TARGET-RT	Female		Caucasian	Not Hispanic or Latin American		Stage III/IV	54	Deceased	80	80
3c7cd774-a7f4-57e3-afe9-e99e2d8b29dc	TARGET-52-PASDLA	TARGET-RT	Female		Caucasian	Hispanic or Latin American		Stage II	332	Survived	--	2399
5cdd05ea-5285-50b7-971a-8bc005d01669	TARGET-52-PARPFY	TARGET-RT	Male		Caucasian	Not Hispanic or Latin American		Stage III	361	Deceased	102	102
131add48-00fb-5982-919f-4996bdcd5c82	TARGET-50-PAKECR	TARGET-WT	Female		Caucasian	Not Hispanic or Latin American		Stage II	1102	Survived	--	3458
76c39b6f-a629-5a66-b562-ee83defb0b47	TARGET-50-PAEAFB	TARGET-WT	Male		Caucasian	Not Hispanic or Latin American		Stage III	490	Deceased	2145	2145
3d1ee6cf-546d-55fa-9f19-a27ff29a0849	TARGET-50-PAKXWB	TARGET-WT	Female		Caucasian	Not Hispanic or Latin American		Stage III	2681	Deceased	458	458
7ab3f02e-e4de-59f1-beb3-1f6308e28f66	TARGET-50-PAJNTJ	TARGET-WT	Male		Other	Not Hispanic or Latin American		Stage II	707	Deceased	1013	1013
4bb21e43-d465-5f6a-96a4-c8682ae3faf8	TARGET-50-PAEBXA	TARGET-WT	Female		African descent	Not Hispanic or Latin American		Stage III	1192	Deceased	1114	1114
de741bc5-b711-504d-b5ac-fbcc34570c58	TARGET-50-CAAAAM	TARGET-WT	Female		Caucasian	Not Hispanic or Latin American		Stage III	2750	Survived	--	3260
9867770a-0037-5f96-b48c-17bc5092f1aa	TARGET-50-PALGLU	TARGET-WT	Female		Caucasian	Hispanic or Latin American		Stage III	1275	Deceased	326	326
0171447a-da02-5e9e-97b0-88d21d85e669	TARGET-50-PAJMVU	TARGET-WT	Female		African descent	Not Hispanic or Latin American		Stage IV	1638	Survived	--	2092
e744ce75-1717-5f39-a6f9-9681d095dbf9	TARGET-50-PAJMLI	TARGET-WT	Male		African descent	Not Hispanic or Latin American		Stage I	1342	Deceased	265	265
c71b52c9-0fb0-57df-9257-d033521c23f0	TARGET-50-PAJLNJ	TARGET-WT	Female		Caucasian	Not reported		Stage II	325	Deceased	858	858
b924440c-c470-5877-980a-6665b47d3329	TARGET-50-PAKRZW	TARGET-WT	Female		Caucasian	Not reported		Stage II	2238	Survived	--	954
3b7ba08e-d020-505b-9e3a-2a17ac091509	TARGET-50-PAKYFC	TARGET-WT	Female		Other	Not Hispanic or Latin American		Stage II	1069	Survived	--	631
8921ce31-3225-5109-8e73-614f2447ae2b	TARGET-50-PAKRCC	TARGET-WT	Male		Caucasian	Not Hispanic or Latin American		Stage I	1466	Survived	--	3215
24057437-cf86-5618-9429-0c16efb6617b	TARGET-50-PAJNJJ	TARGET-WT	Female		Caucasian	Not Hispanic or Latin American		Stage II	5698	Survived	--	3085
6095ab07-e23a-56e2-9a48-9a6658fcc1e7	TARGET-50-PAJMLZ	TARGET-WT	Male		Not reported	Hispanic or Latin American		Stage II	1324	Deceased	358	358
3d496d60-a616-55b6-a6bf-6acf76b56fee	TARGET-50-PAJNBN	TARGET-WT	Male		Caucasian	Not reported		Stage IV	1509	Deceased	759	759
64f0fd66-9e25-5b03-94ae-a2eb98424239	TARGET-50-PAKZFK	TARGET-WT	Female		Caucasian	Not Hispanic or Latin American		Stage II	1340	Survived	--	2073
f4537527-e53e-5621-b5cb-e971382e0c28	TARGET-50-PAJNZI	TARGET-WT	Female		Caucasian	Not Hispanic or Latin American		Stage II	2842	Survived	--	929
6a4f2507-64b7-5b1a-85e3-605aa58be7b9	TARGET-50-PAJLTH	TARGET-WT	Male		Caucasian	Not reported		Stage II	2819	Survived	--	3059
2b385f74-b8e3-5168-a77b-4b6f6c5d1d2e	TARGET-50-PAJPAU	TARGET-WT	Male		Caucasian	Not reported		Stage I	1389	Survived	--	2350
c11ac4ca-e0dd-50b3-a461-a7ab0d1f6264	TARGET-50-PAJMVC	TARGET-WT	Male		African descent	Not Hispanic or Latin American		Stage III	1548	Survived	--	727
756861f3-e20a-5aa9-904e-a51fd26a1cbe	TARGET-50-PALJIP	TARGET-WT	Female		Caucasian	Not Hispanic or Latin American		Stage II	1789	Deceased	770	770
7281d4eb-3513-5e7c-84c7-c6aa9ee53f13	TARGET-50-PAECJB	TARGET-WT	Female		Caucasian	Not Hispanic or Latin American		Stage III	807	Deceased	282	282
78938ff6-d077-5e77-829c-1454ad746737	TARGET-50-PAKNXS	TARGET-WT	Male		Caucasian	Not Hispanic or Latin American		Stage III	1245	Deceased	329	329
5c3bcade-12a5-51f9-b4c5-3a7e241b6807	TARGET-50-PAJNAA	TARGET-WT	Female		Caucasian	Not Hispanic or Latin American		Stage II	3327	Survived	--	2848
8d36b806-163d-5ad1-83f0-ccdc6e728e94	TARGET-50-PAJMMY	TARGET-WT	Male		Caucasian	Hispanic or Latin American		Stage III	1953	Survived	--	4163
2702f0ce-d496-50cd-b4f9-ee82d0e8eb70	TARGET-50-PAKXXF	TARGET-WT	Male		Caucasian	Not Hispanic or Latin American		Stage III	1821	Deceased	416	416
bca5b5c6-5a2c-57ba-b7e9-a67747d00f7b	TARGET-50-PAKKSE	TARGET-WT	Female		Caucasian	Not Hispanic or Latin American		Stage II	847	Survived	--	1925
5ea4d07f-b95b-5fc8-b536-9b643a5554ec	TARGET-50-PALFRD	TARGET-WT	Female		Caucasian	Hispanic or Latin American		Stage III	1785	Survived	--	1420
0bc09e73-617a-527d-9770-8587d6897001	TARGET-50-PAKSDG	TARGET-WT	Male		Caucasian	Not Hispanic or Latin American		Stage I	1002	Deceased	702	702
e15e739f-5024-5e6c-bea9-aae4bb21b165	TARGET-50-PAJMIZ	TARGET-WT	Female		Caucasian	Not reported		Stage III	2488	Deceased	180	180
aa1b2046-c06c-50f2-9391-7ae10f4a0b71	TARGET-50-PAJLSP	TARGET-WT	Male		Caucasian	Not reported		Stage II	706	Survived	--	2789
0b372c9b-2d5a-5483-8c96-7f829d962a99	TARGET-50-CAAAAQ	TARGET-WT	Female		Not reported	Not reported		Stage IV/V	1287	Survived	--	2501
fa45b11d-f94d-50c7-8982-4e3ac5203715	TARGET-50-PAJNLT	TARGET-WT	Female		African descent	Not Hispanic or Latin American		Stage IV	1546	Deceased	440	440
febc157e-ad8d-572b-903c-99752948f367	TARGET-50-PAJPDC	TARGET-WT	Female		Other	Not Hispanic or Latin American		Stage II	2904	Survived	--	2365
f32a3476-d55f-5faa-8c58-814ebfeea46f	TARGET-50-PAKNRX	TARGET-WT	Male		Caucasian	Not Hispanic or Latin American		Stage II	1785	Deceased	586	586
37b63d05-d4fe-544e-b215-9751ab9d4e93	TARGET-50-PAJMSE	TARGET-WT	Female		Caucasian	Not reported		Stage III	1681	Deceased	528	528
ea376f92-8de5-5424-8250-f9c39ed18c8c	TARGET-50-PAJMEP	TARGET-WT	Male		Caucasian	Not Hispanic or Latin American		Stage I	670	Deceased	1563	1563
04721d69-6c48-5423-9574-38fc810dbeda	TARGET-50-PAJMJT	TARGET-WT	Female		Caucasian	Not Hispanic or Latin American		Stage II	1921	Survived	--	4042
37825bea-c75c-5830-90ed-22ea7e057a44	TARGET-50-PAJNEC	TARGET-WT	Female		Caucasian	Not Hispanic or Latin American		Stage III	1474	Deceased	1066	1066
b92ef9b3-68f8-5b5d-becb-b823a0250b3f	TARGET-50-PALDWP	TARGET-WT	Male		Caucasian	Not Hispanic or Latin American		Stage III	2104	Deceased	528	528
fd0ae063-912e-5925-bcc5-86bbd377e0fd	TARGET-50-PAKFYV	TARGET-WT	Female		African descent	Not Hispanic or Latin American		Stage III	1246	Deceased	680	680
a0a0ceff-2847-5661-a117-c68ed2a57bd7	TARGET-50-PAJMUF	TARGET-WT	Male		Caucasian	Not Hispanic or Latin American		Stage III	829	Survived	--	3547
9a70dc22-460b-5b7a-8bc9-3dc232f11126	TARGET-50-PAJLLF	TARGET-WT	Female		Not reported	Not reported		Stage II	2423	Survived	--	2536
a7239dcc-18a7-5c96-bb95-3b117e196e6f	TARGET-50-PAKFME	TARGET-WT	Female		Caucasian	Not Hispanic or Latin American		Stage III	1713	Survived	--	3110
b7dddaad-f48a-5ecb-98ed-b591727324de	TARGET-50-PAJMRL	TARGET-WT	Male		African descent	Not Hispanic or Latin American		Stage II	1685	Deceased	686	686
8e9627b8-82ed-5124-bc4d-93ef2c95467a	TARGET-50-PAKRVH	TARGET-WT	Male		Caucasian	Not Hispanic or Latin American		Stage II	2728	Survived	--	3059
fe4d8eac-595a-5370-a9b8-4611174f1097	TARGET-50-PAKZHF	TARGET-WT	Male		Caucasian	Not Hispanic or Latin American		Stage II	1309	Survived	--	519
852a4e1b-85ed-5f6e-9e74-05dce9702c85	TARGET-50-PAJMKJ	TARGET-WT	Female		Caucasian	Not reported		Stage II	276	Survived	--	3830
69e2e237-e4b1-5a94-9929-c72864feafc8	TARGET-50-PAJMXF	TARGET-WT	Male		Caucasian	Not Hispanic or Latin American		Stage I	1650	Deceased	2099	2099
c06f0889-dee7-5e70-bd0d-854a1230d11d	TARGET-50-PAJLPX	TARGET-WT	Male		African descent	Not Hispanic or Latin American		Stage III	2702	Survived	--	2572
cf4428a4-ddf2-5b2e-8be0-ffdb7d28965a	TARGET-50-PAJPHA	TARGET-WT	Male		Caucasian	Not Hispanic or Latin American		Stage II	1124	Survived	--	1895
c3d30c0e-b697-5470-8165-dd1b77939198	TARGET-50-PAJLUJ	TARGET-WT	Female		Not reported	Not reported		Stage IV	2326	Survived	--	4449
d9d7ee7f-2157-5eae-be03-7076d06ba028	TARGET-50-PAKULH	TARGET-WT	Female		Caucasian	Hispanic or Latin American		Stage III	1030	Deceased	375	375
51e9a1e0-1ec3-506f-a9a6-8ec0845d8e90	TARGET-50-PAKKNS	TARGET-WT	Male		Caucasian	Not Hispanic or Latin American		Stage I	547	Survived	--	1795
b68a9546-4697-530e-a628-08c83a6a7017	TARGET-50-PAKGZX	TARGET-WT	Male		Caucasian	Hispanic or Latin American		Stage III	2201	Survived	--	1963
ca3d8cee-18fd-5b91-8e91-ac588ae8cca3	TARGET-50-PAJPEW	TARGET-WT	Male		Caucasian	Not Hispanic or Latin American		Stage II	5082	Survived	--	3241
7fd45d0f-75b9-50b0-a232-a725663cf2ae	TARGET-50-PAKNTW	TARGET-WT	Male		Caucasian	Not Hispanic or Latin American		Stage III	4779	Survived	--	290
6163ffa9-e0b9-5d6f-b650-0ce2df32b6c3	TARGET-50-PAJNDU	TARGET-WT	Male		Caucasian	Not Hispanic or Latin American		Stage III	2360	Survived	--	2948
9e265b0d-4497-5824-880d-0a0c80c1dfd8	TARGET-50-PAJNCZ	TARGET-WT	Male		Caucasian	Not Hispanic or Latin American		Stage I	581	Survived	--	3579
dee14127-42e8-55db-8aed-58a7416226c8	TARGET-50-CAAAAH	TARGET-WT	Female		Caucasian	Not reported		Stage III	1710	Deceased	311	311
5655c524-18a3-5591-9a5d-5d1240ec7f2e	TARGET-50-PALEZT	TARGET-WT	Female		Caucasian	Not Hispanic or Latin American		Stage II	4397	Survived	--	331
6660e211-1279-5db3-886b-0fc85142627e	TARGET-50-PAJNAV	TARGET-WT	Male		African descent	Not Hispanic or Latin American		Stage IV	1449	Deceased	905	905
c5032173-66d1-5d68-93c9-f330545d7048	TARGET-50-PAJNNR	TARGET-WT	Male		Caucasian	Not reported		Stage III	2265	Deceased	217	217
e7a136c3-e178-59fd-b675-06de4b7e3f05	TARGET-50-PAKWPM	TARGET-WT	Male		Caucasian	Not Hispanic or Latin American		Stage II	1914	Survived	--	2888
16e8a388-f4f5-5a17-90b4-5ec92d1a66a3	TARGET-50-PAJLTI	TARGET-WT	Male		African descent	Not Hispanic or Latin American		Stage I	961	Survived	--	3295
f975d082-0cbe-508e-a90a-e07b75afdc3b	TARGET-50-PAKGMU	TARGET-WT	Female		Caucasian	Not reported		Stage II	1121	Survived	--	2784
2a7dafbf-df0a-53a8-8472-344dd6338d3c	TARGET-50-PAKMUB	TARGET-WT	Male		African descent	Not Hispanic or Latin American		Stage II	2412	Survived	--	477
3ee7be39-0c68-5007-9489-448706a88d20	TARGET-50-PAJLKR	TARGET-WT	Female		Caucasian	Not reported		Stage IV	2247	Survived	--	2589
70da1670-0384-59d4-857b-c53c07a40f50	TARGET-50-PAJMEN	TARGET-WT	Female		Caucasian	Not Hispanic or Latin American		Stage II	1508	Deceased	1732	1732
39c1aa21-d15c-5f9f-9fea-562d14471768	TARGET-50-PAJNSL	TARGET-WT	Female		Caucasian	Not reported		Stage II	160	Survived	--	1990
d16f1595-bd97-596e-ba73-576535a3509f	TARGET-50-PALKRS	TARGET-WT	Male		African descent	Not Hispanic or Latin American		Stage III	2003	Deceased	384	384
c1b1748f-6992-508e-a48a-496d7a4eb209	TARGET-50-PAJNCJ	TARGET-WT	Female		Not reported	Not reported		Stage II	1762	Survived	--	3689
b6c4b6f9-1941-55b6-a66c-1758167faa2c	TARGET-50-CAAAAC	TARGET-WT	Female		Caucasian	Not Hispanic or Latin American		Stage III	2244	Deceased	2615	2615
c8124bca-2540-55b3-8091-46d0b9bc01a8	TARGET-50-PAJLIP	TARGET-WT	Female		Caucasian	Not reported		Stage III	3037	Survived	--	2733
c9615a61-e358-5115-b926-3acc7e90ab72	TARGET-50-PAJPDN	TARGET-WT	Female		African descent	Not Hispanic or Latin American		Stage II	1112	Survived	--	1987
eed7edb7-abaa-54ae-839b-3cf311ab97ee	TARGET-50-PAJNZS	TARGET-WT	Female		Caucasian	Not reported		Stage III	1789	Survived	--	1668
1707c969-73b1-54ec-875f-1b7a6fca056c	TARGET-50-PADZUB	TARGET-WT	Female		Caucasian	Not Hispanic or Latin American		Stage IV	5557	Deceased	1271	1271
b7406393-14ec-5f6c-a924-37986984e9f9	TARGET-50-PAKNAL	TARGET-WT	Female		Caucasian	Not Hispanic or Latin American		Stage III	2070	Survived	--	1492
9880f1f3-bd47-5da9-9e7f-62b7564198b5	TARGET-50-PAJNYT	TARGET-WT	Male		Caucasian	Not Hispanic or Latin American		Stage III	768	Deceased	354	354
29572180-c563-5080-9866-0bb9ed96df9b	TARGET-50-PAJLWT	TARGET-WT	Male		Caucasian	Not reported		Stage II	1262	Deceased	994	994
05808c8b-6bd1-520e-beab-f2b70ea86c87	TARGET-50-PAKSCC	TARGET-WT	Male		Other	Hispanic or Latin American		Stage II	691	Survived	--	1628
f8ea90e4-af7f-5f6f-a22b-804b07fefa6f	TARGET-50-CAAAAL	TARGET-WT	Female		African descent	Not Hispanic or Latin American		Stage III	1599	Survived	--	3289
8bf8a722-ef2c-5d26-aa38-dc816de848de	TARGET-50-PAKVET	TARGET-WT	Female		Caucasian	Not Hispanic or Latin American		Stage I	405	Survived	--	1475
e6fe798a-bea5-5a0b-9779-d057da4ac78b	TARGET-50-PALLFB	TARGET-WT	Male		Caucasian	Not Hispanic or Latin American		Stage III	2879	Deceased	343	343
72749b08-856a-5f49-b4d8-4ff4a472de4b	TARGET-50-PAJNUP	TARGET-WT	Female		Caucasian	Not reported		Stage III	2201	Deceased	752	752
0224e9da-d6e7-5b8f-91f6-bc8372ee5d22	TARGET-50-CAAAAO	TARGET-WT	Female		Not reported	Not reported		Stage III	1326	Deceased	672	672
91497bb6-805e-5228-9788-adde985d303c	TARGET-50-PAJMFY	TARGET-WT	Female		Caucasian	Not reported		Stage II	1868	Survived	--	748
157df805-b1c3-5489-be11-579a304297be	TARGET-50-PAJNVE	TARGET-WT	Female		Caucasian	Not Hispanic or Latin American		Stage III	800	Survived	--	3382
84856b30-9fff-51de-81df-4f392d3dd317	TARGET-50-PADXAY	TARGET-WT	Male		Caucasian	Not Hispanic or Latin American		Stage II	1958	Survived	--	4795
7c161414-e04f-5ec0-9f92-97a277ca23eb	TARGET-50-PAKGED	TARGET-WT	Female		Caucasian	Not Hispanic or Latin American		Stage III	2809	Survived	--	1791
4dcdd89c-b2a7-594c-95d7-f0e17b7ba440	TARGET-50-PAJMEL	TARGET-WT	Female		Caucasian	Not Hispanic or Latin American		Stage IV	1336	Survived	--	4002
42f78594-db07-5523-b17f-67d5188ebd0a	TARGET-50-PAKMSV	TARGET-WT	Male		Caucasian	Not Hispanic or Latin American		Stage III	1968	Deceased	733	733
83d3a5f5-41b0-5c12-b120-c70c4d7a984f	TARGET-50-PAJNZU	TARGET-WT	Female		Caucasian	Not Hispanic or Latin American		Stage I	970	Survived	--	3451
f1343c19-9d58-56ce-9cf4-486b764469db	TARGET-50-PALFME	TARGET-WT	Male		Caucasian	Hispanic or Latin American		Stage II	3703	Deceased	267	267
a52a85e7-38b0-5f29-879f-f898ed20f2ee	TARGET-50-PAJNZK	TARGET-WT	Female		Caucasian	Not Hispanic or Latin American		Stage II	1532	Survived	--	1040
d8b01991-bd6b-5658-b486-bb22a7b2a81e	TARGET-50-PAKYLT	TARGET-WT	Female		Caucasian	Not Hispanic or Latin American		Stage III	2307	Survived	--	2812
d48fcaa9-1353-5b14-b41a-7319b73cf046	TARGET-50-PAKZER	TARGET-WT	Female		Caucasian	Not Hispanic or Latin American		Stage II	2271	Survived	--	2829
b2494bc4-4569-56b6-9baa-7a5e4cf36711	TARGET-50-CAAAAJ	TARGET-WT	Female		Caucasian	Not Hispanic or Latin American		Stage IV	401	Survived	--	3385
22e5e9b7-e477-5379-b3af-e9e3c853a1ed	TARGET-50-PAJPGY	TARGET-WT	Female		Caucasian	Not Hispanic or Latin American		Stage II	2122	Survived	--	2910
8c189b82-c505-5227-b248-9b2f575e965e	TARGET-50-PAJNRL	TARGET-WT	Male		African descent	Not Hispanic or Latin American		Stage IV	1476	Deceased	256	256
9b78aeef-39d1-52fd-9b6b-302ec09c40e7	TARGET-50-PAJNUS	TARGET-WT	Male		African descent	Not Hispanic or Latin American		Stage IV	887	Deceased	647	647
d9f4709d-5d3c-5ae3-8c2d-07466f088e0d	TARGET-50-PAJNGH	TARGET-WT	Male		Caucasian	Not reported		Stage I	851	Deceased	1229	1229
797675aa-43fe-5067-8bbf-ab923e9402aa	TARGET-50-PAJNNC	TARGET-WT	Male		Not reported	Not reported		Stage II	281	Survived	--	1732
7ca67e09-27b3-5815-a5b6-9064a0bc732d	TARGET-50-PAJPAR	TARGET-WT	Female		African descent	Not Hispanic or Latin American		Stage III	1950	Deceased	542	542
5dc9328b-b5a0-5542-bda9-752bac0b0178	TARGET-50-CAAAAS	TARGET-WT	Female		Caucasian	Not Hispanic or Latin American		Stage III	2476	Survived	--	639
f55316e3-733c-574f-a1ab-3f65ee0f319c	TARGET-50-PAJNVX	TARGET-WT	Male		Caucasian	Not reported		Stage I	1365	Deceased	427	427
83a1865d-4be5-561e-a91d-e93312bc47f2	TARGET-50-PALERC	TARGET-WT	Female		Caucasian	Not Hispanic or Latin American		Stage II	156	Survived	--	2790
51d3eea6-c85f-58cd-8338-46fa50fc2d12	TARGET-50-PALGAZ	TARGET-WT	Female		Caucasian	Hispanic or Latin American		Stage I	222	Deceased	422	422
719e3c7c-54a0-5f00-86e9-dfd34f0e7900	TARGET-50-CAAAAR	TARGET-WT	Female		Not reported	Not reported		Stage IV	314	Survived	--	3542
11ea3935-e7eb-537d-b055-fa07f063a54d	TARGET-50-PAJMFU	TARGET-WT	Female		Not reported	Hispanic or Latin American		Stage II	1348	Survived	--	2894
5761a7af-2883-517c-bbc1-2d78898cd85e	TARGET-50-PAKUIT	TARGET-WT	Female		Caucasian	Not Hispanic or Latin American		Stage IV	1236	Deceased	228	228
26e501c4-c3df-592f-b7e7-76dfeade7a55	TARGET-50-PAJPCM	TARGET-WT	Female		Caucasian	Not reported		Stage II	1754	Survived	--	3121
49baff6a-e0b8-54ec-a169-d82f97912708	TARGET-50-PAJNCC	TARGET-WT	Male		African descent	Not Hispanic or Latin American		Stage II	797	Survived	--	2845
9ba1348f-150c-5282-998e-80e386468d95	TARGET-50-PAJNRH	TARGET-WT	Female		Other	Hispanic or Latin American		Stage I	1340	Survived	--	1703
128b06f8-c16a-588e-adf2-68c87e038590	TARGET-50-PALGVY	TARGET-WT	Female		Caucasian	Not Hispanic or Latin American		Stage III	1182	Survived	--	1286
a60dc117-ccf1-52fa-a651-f43306901886	TARGET-50-PAJLKC	TARGET-WT	Female		Caucasian	Not reported		Stage II	2464	Survived	--	2930
a1c6fe4a-6d2b-5278-b0a5-75e51e31894e	TARGET-50-PALKCW	TARGET-WT	Male		Caucasian	Not Hispanic or Latin American		Stage II	1895	Survived	--	1110
e5224b30-351f-5d6a-a050-cf55f07cd987	TARGET-50-PAJMKI	TARGET-WT	Male		Caucasian	Not Hispanic or Latin American		Stage III	2168	Deceased	630	630
92cde419-e466-539f-9528-87fe382df5f8	TARGET-50-PAKPDF	TARGET-WT	Female		African descent	Not Hispanic or Latin American		Stage III	1912	Deceased	345	345
f30383b6-1355-57eb-a0ee-558070012904	TARGET-50-PAKJGM	TARGET-WT	Male		Caucasian	Not Hispanic or Latin American		Stage III	1007	Deceased	409	409
3a4693f0-cf26-5767-b036-5d51a46cf1a6	TARGET-50-PALDTE	TARGET-WT	Male		Caucasian	Not Hispanic or Latin American		Stage II	979	Survived	--	2551
TCGA, The Cancer Genome Atlas.
